# Supplementary material
Source: PubMed Central journal article supplement (PMC7511990)

**National Cancer Institute Developmental Therapeutics Program  
In-Vitro Screening Data Review Checklist**

**NSC:** D - 720780 / 1

**Experiment ID:** 0103BS71

**Test Date:** March 26, 2001

**Review Date:**

Pending Action by the NCI for this experiment

1. \_\_\_\_\_ None
2. \_\_\_\_\_ Repeat testing in the Primary Screen
3. \_\_\_\_\_ Refer to Biological Evaluation Committee
4. \_\_\_\_\_ Currently under Review by Biological Evaluation Committee

# National Cancer Institute Developmental Therapeutics Program In-Vitro Testing Results

|                                  |                                       |                |               |
|----------------------------------|---------------------------------------|----------------|---------------|
| NSC : D - 720780 / 1             | Experiment ID : 0103BS71              | Test Type : 08 | Units : Molar |
| Report Date : September 01, 2011 | Test Date : March 26, 2001            | QNS :          | MC :          |
| COMI : 25EpiRitt (7334)          | Stain Reagent : SRB Dual-Pass Related | SSPL : 0GZS    |               |

| Panel/Cell Line                   | Log10 Concentration |       |                        |       |       |       |       |       |                |      |      |      |            |            | GI50      | TGI | LC50 |
|-----------------------------------|---------------------|-------|------------------------|-------|-------|-------|-------|-------|----------------|------|------|------|------------|------------|-----------|-----|------|
|                                   | Time                |       | Mean Optical Densities |       |       |       |       |       | Percent Growth |      |      |      |            |            |           |     |      |
|                                   | Zero                | Ctrl  | -10.0                  | -9.0  | -8.0  | -7.0  | -6.0  | -10.0 | -9.0           | -8.0 | -7.0 | -6.0 | -5.0       | -4.0       |           |     |      |
| <b>Leukemia</b>                   |                     |       |                        |       |       |       |       |       |                |      |      |      |            |            |           |     |      |
| CCRF-CEM                          | 0.316               | 0.920 | 0.441                  | 0.348 | 0.298 | 0.273 | 0.161 | 21    | 5              | -6   | -14  | -49  | < 1.00E-10 | 3.03E-9    | > 1.00E-6 |     |      |
| HL-60(TB)                         | 1.133               | 2.972 | 1.918                  | 1.555 | 1.313 | 1.268 | 1.068 | 43    | 23             | 10   | 7    | -6   | < 1.00E-10 | 3.63E-7    | > 1.00E-6 |     |      |
| K-562                             | 0.257               | 1.407 | 0.540                  | 0.250 | 0.285 | 0.239 | 0.196 | 25    | -3             | 2    | -7   | -24  | < 1.00E-10 | .          | > 1.00E-6 |     |      |
| MOLT-4                            | 0.251               | 0.754 | 0.145                  | 0.115 | 0.126 | 0.136 | 0.160 | -42   | -54            | -50  | -46  | -36  | < 1.00E-10 | < 1.00E-10 | .         |     |      |
| RPMI-8226                         | 0.517               | 1.554 | 0.423                  | 0.374 | 0.344 | 0.342 | 0.271 | -18   | -28            | -34  | -34  | -48  | < 1.00E-10 | < 1.00E-10 | > 1.00E-6 |     |      |
| SR                                | 0.322               | 1.176 | 0.421                  | 0.335 | 0.278 | 0.283 | 0.152 | 12    | 1              | -14  | -12  | -53  | < 1.00E-10 | 1.25E-9    | 8.47E-7   |     |      |
| <b>Non-Small Cell Lung Cancer</b> |                     |       |                        |       |       |       |       |       |                |      |      |      |            |            |           |     |      |
| A549/ATCC                         | 0.192               | 1.193 | 0.685                  | 0.673 | 0.556 | 0.545 | 0.535 | 49    | 48             | 36   | 35   | 34   | < 1.00E-10 | > 1.00E-6  | > 1.00E-6 |     |      |
| EKVX                              | 0.757               | 1.564 | 1.091                  | 1.034 | 0.897 | 0.914 | 0.393 | 41    | 34             | 17   | 19   | -48  | < 1.00E-10 | 1.94E-7    | > 1.00E-6 |     |      |
| HOP-62                            | 0.396               | 0.981 | 0.753                  | 0.614 | 0.572 | 0.559 | 0.325 | 61    | 37             | 30   | 28   | -18  | 2.89E-10   | 4.06E-7    | > 1.00E-6 |     |      |
| HOP-92                            | 0.761               | 0.961 | 0.808                  | 0.751 | 0.711 | 0.673 | 0.478 | 24    | -1             | -7   | -12  | -37  | < 1.00E-10 | 8.80E-10   | > 1.00E-6 |     |      |
| NCI-H226                          | 0.525               | 1.365 | 1.250                  | 1.135 | 1.089 | 1.062 | 0.879 | 86    | 73             | 67   | 64   | 42   | 4.34E-7    | > 1.00E-6  | > 1.00E-6 |     |      |
| NCI-H23                           | 0.191               | 0.744 | 0.599                  | 0.573 | 0.422 | 0.370 | 0.231 | 74    | 69             | 42   | 32   | 7    | 5.01E-9    | > 1.00E-6  | > 1.00E-6 |     |      |
| NCI-H322M                         | 0.624               | 1.443 | 1.238                  | 1.262 | 1.068 | 1.043 | 0.692 | 75    | 78             | 54   | 51   | 8    | 1.07E-7    | > 1.00E-6  | > 1.00E-6 |     |      |
| NCI-H460                          | 0.203               | 1.267 | 0.537                  | 0.281 | 0.205 | 0.184 | 0.182 | 31    | 7              | .    | -10  | -10  | < 1.00E-10 | 1.03E-8    | > 1.00E-6 |     |      |
| NCI-H522                          | 0.497               | 1.188 | 0.998                  | 0.798 | 0.400 | 0.271 | 0.167 | 72    | 43             | -20  | -46  | -66  | 5.96E-10   | 4.89E-9    | 1.63E-7   |     |      |
| <b>Colon Cancer</b>               |                     |       |                        |       |       |       |       |       |                |      |      |      |            |            |           |     |      |
| COLO 205                          | 0.308               | 1.171 | 1.090                  | 0.604 | 0.104 | 0.092 | 0.025 | 91    | 34             | -66  | -70  | -92  | 5.25E-10   | 2.19E-9    | 6.87E-9   |     |      |
| HCC-2998                          | 0.457               | 1.157 | 0.784                  | 0.808 | 0.812 | 0.768 | 0.633 | 47    | 50             | 51   | 44   | 25   | .          | > 1.00E-6  | > 1.00E-6 |     |      |
| HCT-116                           | 0.105               | 0.636 | 0.297                  | 0.186 | 0.245 | 0.217 | 0.092 | 36    | 15             | 26   | 21   | -12  | < 1.00E-10 | 4.26E-7    | > 1.00E-6 |     |      |
| HCT-15                            | 0.110               | 0.646 | 0.624                  | 0.528 | 0.309 | 0.129 | 0.091 | 96    | 78             | 37   | 4    | -17  | 4.83E-9    | 1.48E-7    | > 1.00E-6 |     |      |
| HT29                              | 0.511               | 1.478 | 1.023                  | 0.721 | 0.551 | 0.513 | 0.324 | 53    | 22             | 4    | .    | -37  | 1.24E-10   | 1.01E-7    | > 1.00E-6 |     |      |
| KM12                              | 0.327               | 1.424 | 1.169                  | 0.886 | 0.515 | 0.580 | 0.365 | 77    | 51             | 17   | 23   | 3    | 1.07E-9    | > 1.00E-6  | > 1.00E-6 |     |      |
| SW-620                            | 0.213               | 1.067 | 0.597                  | 0.419 | 0.296 | 0.234 | 0.122 | 45    | 24             | 10   | 2    | -43  | < 1.00E-10 | 1.13E-7    | > 1.00E-6 |     |      |
| <b>CNS Cancer</b>                 |                     |       |                        |       |       |       |       |       |                |      |      |      |            |            |           |     |      |
| SF-268                            | 0.523               | 1.299 | 0.964                  | 0.797 | 0.704 | 0.670 | 0.474 | 57    | 35             | 23   | 19   | -9   | 2.07E-10   | 4.67E-7    | > 1.00E-6 |     |      |
| SF-295                            | 0.481               | 1.256 | 0.337                  | 0.284 | 0.180 | 0.176 | 0.141 | -30   | -41            | -63  | -63  | -71  | < 1.00E-10 | < 1.00E-10 | 2.60E-9   |     |      |
| SF-539                            | 0.578               | 1.433 | 0.674                  | 0.495 | 0.215 | 0.174 | 0.100 | 11    | -14            | -63  | -70  | -83  | < 1.00E-10 | 2.74E-10   | 5.44E-9   |     |      |
| SNB-19                            | 0.347               | 1.444 | 0.997                  | 0.900 | 0.735 | 0.732 | 0.426 | 59    | 50             | 35   | 35   | 7    | 1.06E-9    | > 1.00E-6  | > 1.00E-6 |     |      |
| U251                              | 0.206               | 1.138 | 0.570                  | 0.579 | 0.490 | 0.440 | 0.432 | 39    | 40             | 30   | 25   | 24   | < 1.00E-10 | > 1.00E-6  | > 1.00E-6 |     |      |
| <b>Melanoma</b>                   |                     |       |                        |       |       |       |       |       |                |      |      |      |            |            |           |     |      |
| LOX IMVI                          | 0.270               | 1.637 | 0.756                  | 0.419 | 0.303 | 0.270 | 0.332 | 36    | 11             | 2    | .    | 4    | < 1.00E-10 | > 1.00E-6  | > 1.00E-6 |     |      |
| MALME-3M                          | 0.720               | 1.336 | 1.175                  | 1.082 | 0.831 | 0.799 | 0.710 | 74    | 59             | 18   | 13   | -1   | 1.64E-9    | 7.97E-7    | > 1.00E-6 |     |      |
| M14                               | 0.180               | 0.734 | 0.669                  | 0.468 | 0.299 | 0.306 | 0.143 | 88    | 52             | 21   | 23   | -21  | 1.16E-9    | 3.32E-7    | > 1.00E-6 |     |      |
| MDA-MB-435                        | 0.367               | 1.470 | 1.097                  | 0.693 | 0.425 | 0.443 | 0.382 | 66    | 30             | 5    | 7    | 1    | 2.76E-10   | > 1.00E-6  | > 1.00E-6 |     |      |
| MDA-N                             | 0.255               | 1.070 | 0.715                  | 0.413 | 0.210 | 0.210 | 0.131 | 56    | 19             | -18  | -18  | -49  | 1.49E-10   | 3.34E-9    | > 1.00E-6 |     |      |
| SK-MEL-2                          | 0.349               | 0.825 | 0.651                  | 0.623 | 0.535 | 0.506 | 0.367 | 63    | 58             | 39   | 33   | 4    | 2.56E-9    | > 1.00E-6  | > 1.00E-6 |     |      |
| SK-MEL-28                         | 0.570               | 0.742 | 0.550                  | 0.272 | 0.113 | 0.115 | 0.027 | -4    | -52            | -80  | -80  | -95  | < 1.00E-10 | < 1.00E-10 | 8.98E-10  |     |      |
| SK-MEL-5                          | 0.455               | 1.286 | 0.715                  | 0.659 | 0.160 | 0.130 | 0.055 | 31    | 24             | -65  | -71  | -88  | < 1.00E-10 | 1.88E-9    | 6.82E-9   |     |      |
| UACC-257                          | 0.614               | 1.477 | 1.439                  | 1.112 | 0.302 | 0.306 | 0.222 | 96    | 58             | -51  | -50  | -64  | 1.18E-9    | 3.40E-9    | 9.83E-9   |     |      |
| UACC-62                           | 0.529               | 1.789 | 1.219                  | 0.412 | 0.407 | 0.451 | 0.367 | 55    | -22            | -23  | -15  | -31  | 1.15E-10   | 5.14E-10   | > 1.00E-6 |     |      |
| <b>Ovarian Cancer</b>             |                     |       |                        |       |       |       |       |       |                |      |      |      |            |            |           |     |      |
| IGROV1                            | 0.557               | 1.609 | 1.081                  | 0.907 | 0.733 | 0.734 | 0.509 | 50    | 33             | 17   | 17   | -9   | < 1.00E-10 | 4.58E-7    | > 1.00E-6 |     |      |
| OVCAR-3                           | 0.650               | 1.576 | 1.417                  | 1.394 | 1.269 | 1.228 | 1.081 | 83    | 80             | 67   | 62   | 47   | 6.05E-7    | > 1.00E-6  | > 1.00E-6 |     |      |
| OVCAR-5                           | 0.408               | 1.052 | 0.813                  | 0.626 | 0.554 | 0.599 | 0.258 | 63    | 34             | 23   | 30   | -37  | 2.77E-10   | 2.79E-7    | > 1.00E-6 |     |      |
| OVCAR-8                           | 0.351               | 1.173 | 0.995                  | 0.851 | 0.833 | 0.736 | 0.560 | 78    | 61             | 59   | 47   | 25   | 5.39E-8    | > 1.00E-6  | > 1.00E-6 |     |      |
| NCI/ADR-RES                       | 0.422               | 1.032 | 0.992                  | 0.978 | 0.817 | 0.693 | 0.574 | 93    | 91             | 65   | 44   | 25   | 5.29E-8    | > 1.00E-6  | > 1.00E-6 |     |      |
| SK-OV-3                           | 0.790               | 1.284 | 1.092                  | 0.972 | 0.740 | 0.669 | 0.341 | 61    | 37             | -6   | -15  | -57  | 2.87E-10   | 7.13E-9    | 6.82E-7   |     |      |
| <b>Renal Cancer</b>               |                     |       |                        |       |       |       |       |       |                |      |      |      |            |            |           |     |      |
| 786-0                             | 0.404               | 1.311 | 0.706                  | 0.630 | 0.537 | 0.566 | 0.254 | 33    | 25             | 15   | 18   | -37  | < 1.00E-10 | 2.11E-7    | > 1.00E-6 |     |      |
| A498                              | 0.929               | 1.449 | 1.154                  | 1.060 | 0.893 | 0.554 | 0.267 | 43    | 25             | -4   | -40  | -71  | < 1.00E-10 | 7.35E-9    | 2.04E-7   |     |      |
| ACHN                              | 0.290               | 1.089 | 0.818                  | 0.729 | 0.656 | 0.612 | 0.460 | 66    | 55             | 46   | 40   | 21   | 3.44E-9    | > 1.00E-6  | > 1.00E-6 |     |      |
| CAKI-1                            | 0.738               | 1.870 | 1.609                  | 1.175 | 0.831 | 0.717 | 0.455 | 77    | 39             | 8    | -3   | -38  | 5.04E-10   | 5.46E-8    | > 1.00E-6 |     |      |
| RXF 393                           | 0.575               | 0.901 | 0.436                  | 0.342 | 0.314 | 0.306 | 0.207 | -24   | -41            | -45  | -47  | -64  | < 1.00E-10 | < 1.00E-10 | 1.52E-7   |     |      |
| SN12C                             | 0.430               | 1.425 | 1.222                  | 1.112 | 0.983 | 0.896 | 0.786 | 80    | 69             | 56   | 47   | 36   | 4.36E-8    | > 1.00E-6  | > 1.00E-6 |     |      |
| TK-10                             | 0.606               | 1.497 | 1.264                  | 1.320 | 1.173 | 1.033 | 0.708 | 74    | 80             | 64   | 48   | 11   | 7.38E-8    | > 1.00E-6  | > 1.00E-6 |     |      |
| UO-31                             | 0.466               | 1.313 | 1.150                  | 0.793 | 0.615 | 0.533 | 0.298 | 81    | 39             | 18   | 8    | -36  | 5.37E-10   | 1.51E-7    | > 1.00E-6 |     |      |
| <b>Prostate Cancer</b>            |                     |       |                        |       |       |       |       |       |                |      |      |      |            |            |           |     |      |
| PC-3                              | 0.325               | 0.876 | 0.567                  | 0.477 | 0.363 | 0.365 | 0.251 | 44    | 28             | 7    | 7    | -23  | < 1.00E-10 | 1.74E-7    | > 1.00E-6 |     |      |
| DU-145                            | 0.277               | 1.098 | 0.849                  | 0.837 | 0.817 | 0.745 | 0.548 | 70    | 68             | 66   | 57   | 33   | 1.96E-7    | > 1.00E-6  | > 1.00E-6 |     |      |
| <b>Breast Cancer</b>              |                     |       |                        |       |       |       |       |       |                |      |      |      |            |            |           |     |      |
| MCF7                              | 0.181               | 0.724 | 0.368                  | 0.273 | 0.204 | 0.195 | 0.125 | 34    | 17             | 4    | 2    | -31  | < 1.00E-10 | 1.19E-7    | > 1.00E-6 |     |      |
| MDA-MB-231/ATCC                   | 0.357               | 0.857 | 0.655                  | 0.612 | 0.552 | 0.533 | 0.372 | 60    | 51             | 39   | 35   | 3    | 1.22E-9    | > 1.00E-6  | > 1.00E-6 |     |      |
| HS 578T                           | 0.562               | 1.253 | 0.563                  | 0.490 | 0.403 | 0.376 | 0.301 | .     | -13            | -28  | -33  | -46  | < 1.00E-10 | 1.01E-10   | > 1.00E-6 |     |      |
| BT-549                            | 0.363               | 0.742 | 0.535                  | 0.528 | 0.479 | 0.433 | 0.339 | 45    | 44             | 31   | 18   | -7   | < 1.00E-10 | 5.38E-7    | > 1.00E-6 |     |      |
| T-47D                             | 0.332               | 0.746 | 0.587                  | 0.581 | 0.540 | 0.527 | 0.471 | 62    | 60             | 50   | 47   | 34   | 1.25E-8    | > 1.00E-6  | > 1.00E-6 |     |      |

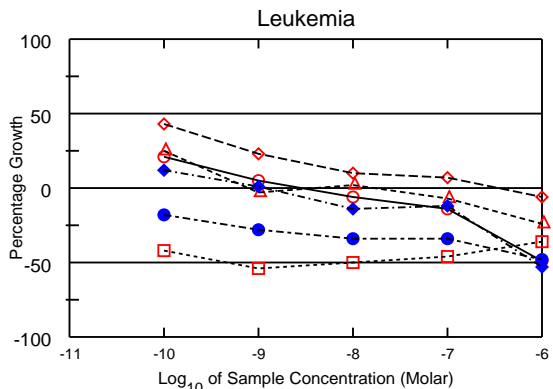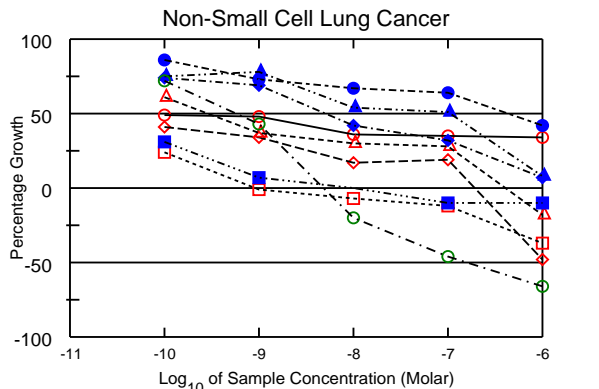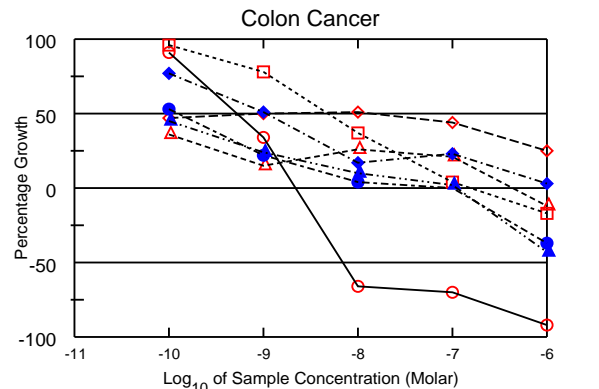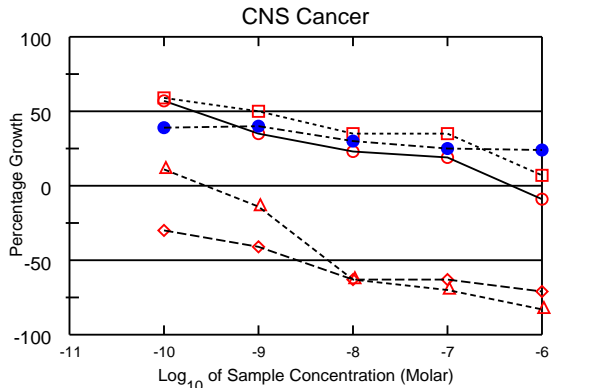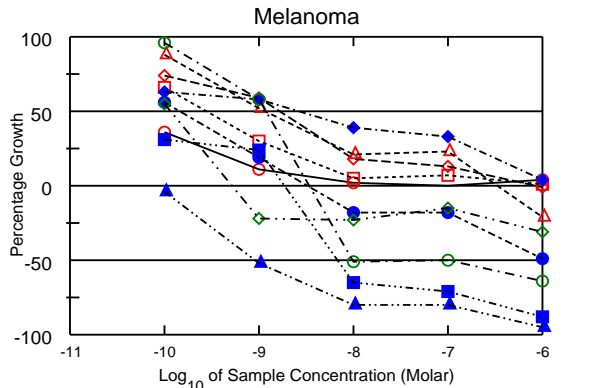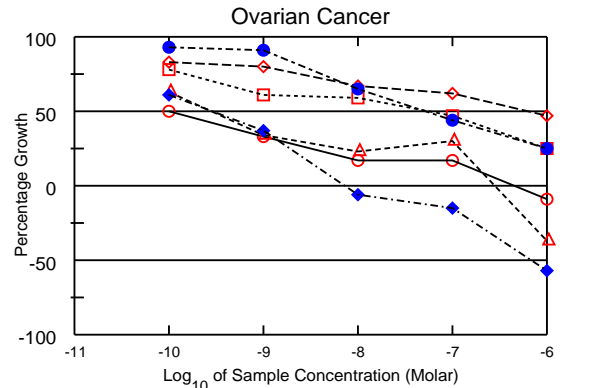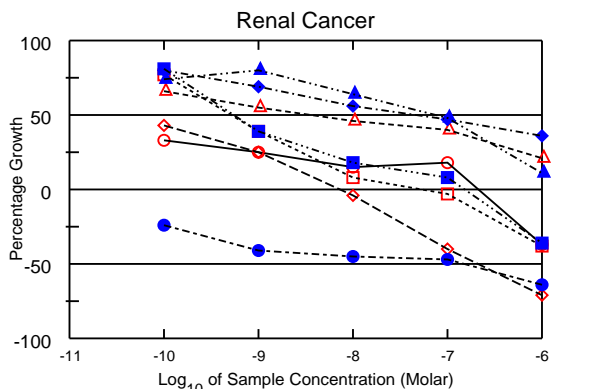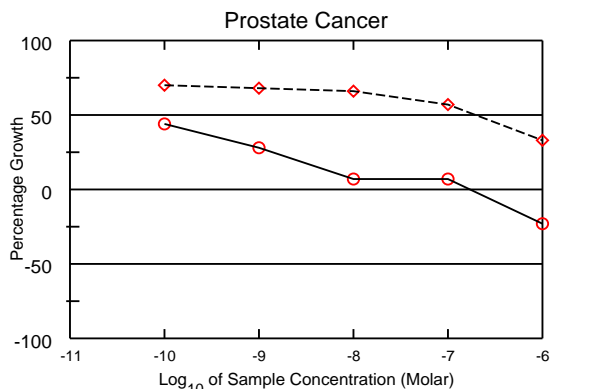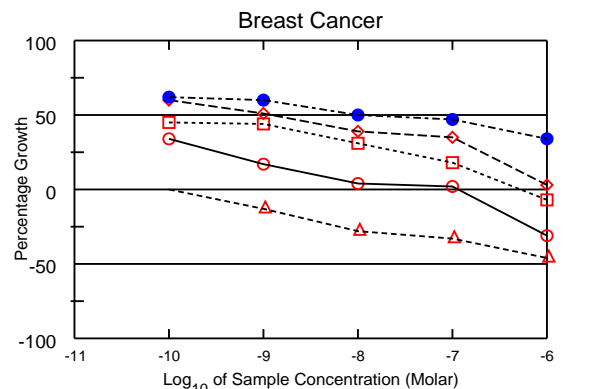

| National Cancer Institute Developmental Therapeutics Program |                        | NSC : D - 720780/1              |                       | Units :Molar |                        | SSPL :0GZS                |  | EXP. ID :0103BS71 |       |
|--------------------------------------------------------------|------------------------|---------------------------------|-----------------------|--------------|------------------------|---------------------------|--|-------------------|-------|
| Mean Graphs                                                  |                        | Report Date :September 01, 2011 |                       |              |                        | Test Date :March 26, 2001 |  |                   |       |
| Panel/Cell Line                                              | Log <sub>10</sub> GI50 | GI50                            | Log <sub>10</sub> TGI | TGI          | Log <sub>10</sub> LC50 | LC50                      |  |                   |       |
| -----                                                        |                        |                                 |                       |              |                        |                           |  |                   |       |
| Leukemia                                                     |                        |                                 |                       |              |                        |                           |  |                   |       |
| CCRF-CEM                                                     | ^ ^                    | -10.00                          |                       | -8.52        |                        | -6.00                     |  | v v               |       |
| HL-60(TB)                                                    | ^ ^                    | -10.00                          |                       | -6.44        |                        | -6.00                     |  | v v               |       |
| K-562                                                        | ^ ^                    | -10.00                          |                       |              |                        | -6.00                     |  | v v               |       |
| MOLT-4                                                       | ^ ^                    | -10.00                          |                       | ^            | -10.00                 |                           |  | v v               |       |
| RPMI-8226                                                    | ^ ^                    | -10.00                          |                       | ^            | -10.00                 |                           |  | v v               |       |
| SR                                                           | ^                      | -10.00                          |                       |              | -8.90                  |                           |  | v                 | -6.07 |
| -----                                                        |                        |                                 |                       |              |                        |                           |  |                   |       |
| Non-Small Cell Lung Cancer                                   |                        |                                 |                       |              |                        |                           |  |                   |       |
| A549/ATCC                                                    | ^ ^                    | -10.00                          |                       | >            | -6.00                  |                           |  | v v               | -6.00 |
| EKVX                                                         | ^ ^                    | -10.00                          |                       |              | -6.71                  |                           |  | v v               | -6.00 |
| HOP-62                                                       |                        | -9.54                           |                       |              | -6.39                  |                           |  | v v               | -6.00 |
| HOP-92                                                       | ^                      | -10.00                          |                       |              | -9.06                  |                           |  | v v               | -6.00 |
| NCI-H226                                                     |                        | -6.36                           |                       |              | -6.00                  |                           |  | v v               | -6.00 |
| NCI-H23                                                      |                        | -8.30                           |                       |              | -6.00                  |                           |  | v v               | -6.00 |
| NCI-H322M                                                    |                        | -6.97                           |                       |              | -6.00                  |                           |  | v v               | -6.00 |
| NCI-H460                                                     | ^                      | -10.00                          |                       |              | -7.99                  |                           |  | v v               | -6.00 |
| NCI-H522                                                     |                        | -9.23                           |                       |              | -8.31                  |                           |  | v v               | -6.79 |
| -----                                                        |                        |                                 |                       |              |                        |                           |  |                   |       |
| Colon Cancer                                                 |                        |                                 |                       |              |                        |                           |  |                   |       |
| COLO 205                                                     |                        | -9.28                           |                       |              | -8.66                  |                           |  | v                 | -8.16 |
| HCC-2998                                                     |                        |                                 |                       | >            | -6.00                  |                           |  | v v               | -6.00 |
| HCT-116                                                      | ^                      | -10.00                          |                       |              | -6.37                  |                           |  | v v               | -6.00 |
| HCT-15                                                       |                        | -8.32                           |                       |              | -6.83                  |                           |  | v v               | -6.00 |
| HT29                                                         |                        | -9.91                           |                       |              | -7.00                  |                           |  | v v               | -6.00 |
| KM12                                                         |                        | -8.97                           |                       |              | -6.00                  |                           |  | v v               | -6.00 |
| SW-620                                                       | ^                      | -10.00                          |                       |              | -6.95                  |                           |  | v                 | -6.00 |
| -----                                                        |                        |                                 |                       |              |                        |                           |  |                   |       |
| CNS Cancer                                                   |                        |                                 |                       |              |                        |                           |  |                   |       |
| SF-268                                                       |                        | -9.68                           |                       |              | -6.33                  |                           |  | v                 | -6.00 |
| SF-295                                                       | ^ ^                    | -10.00                          |                       | ^            | -10.00                 |                           |  | v                 | -8.58 |
| SF-539                                                       | ^ ^                    | -10.00                          |                       |              | -9.56                  |                           |  | v                 | -8.26 |
| SNB-19                                                       |                        | -8.97                           |                       |              | -6.00                  |                           |  | v                 | -6.00 |
| U251                                                         | ^                      | -10.00                          |                       |              | -6.00                  |                           |  | v                 | -6.00 |
| -----                                                        |                        |                                 |                       |              |                        |                           |  |                   |       |
| Melanoma                                                     |                        |                                 |                       |              |                        |                           |  |                   |       |
| LOX IMVI                                                     | ^                      | -10.00                          |                       | >            | -6.00                  |                           |  | v v               | -6.00 |
| MALME-3M                                                     |                        | -8.79                           |                       |              | -6.10                  |                           |  | v v               | -6.00 |
| M14                                                          |                        | -8.94                           |                       |              | -6.48                  |                           |  | v v               | -6.00 |
| MDA-MB-435                                                   |                        | -9.56                           |                       |              | -6.00                  |                           |  | v v               | -6.00 |
| MDA-N                                                        |                        | -8.83                           |                       |              | -8.48                  |                           |  | v v               | -6.00 |
| SK-MEL-2                                                     |                        | -8.59                           |                       |              | -6.00                  |                           |  | v v               | -6.00 |
| SK-MEL-28                                                    | ^ ^                    | -10.00                          |                       | ^            | -10.00                 |                           |  | v v               | -9.05 |
| SK-MEL-5                                                     | ^ ^                    | -10.00                          |                       |              | -8.73                  |                           |  | v v               | -8.17 |
| UACC-257                                                     |                        | -8.93                           |                       |              | -8.47                  |                           |  | v v               | -8.01 |
| UACC-62                                                      |                        | -9.94                           |                       |              | -9.29                  |                           |  | v                 | -6.00 |
| -----                                                        |                        |                                 |                       |              |                        |                           |  |                   |       |
| Ovarian Cancer                                               |                        |                                 |                       |              |                        |                           |  |                   |       |
| IGROV1                                                       | ^                      | -10.00                          |                       |              | -6.34                  |                           |  | v v               | -6.00 |
| OVCAR-3                                                      |                        | -6.22                           |                       | >            | -6.00                  |                           |  | v v               | -6.00 |
| OVCAR-5                                                      |                        | -9.56                           |                       |              | -6.55                  |                           |  | v v               | -6.00 |
| OVCAR-8                                                      |                        | -7.27                           |                       |              | -6.00                  |                           |  | v v               | -6.00 |
| NCI/ADR-RES                                                  |                        | -7.28                           |                       |              | -6.00                  |                           |  | v v               | -6.00 |
| SK-OV-3                                                      |                        | -9.54                           |                       |              | -8.15                  |                           |  | v v               | -6.17 |
| -----                                                        |                        |                                 |                       |              |                        |                           |  |                   |       |
| Renal Cancer                                                 |                        |                                 |                       |              |                        |                           |  |                   |       |
| 786-O                                                        | ^ ^                    | -10.00                          |                       |              | -6.68                  |                           |  | v                 | -6.00 |
| A498                                                         | ^ ^                    | -10.00                          |                       |              | -8.13                  |                           |  | v                 | -6.69 |
| ACHN                                                         |                        | -8.46                           |                       |              | -6.00                  |                           |  | v                 | -6.00 |
| CAKI-1                                                       |                        | -9.30                           |                       |              | -7.26                  |                           |  | v                 | -6.00 |
| RXF 393                                                      | ^                      | -10.00                          |                       | ^            | -10.00                 |                           |  | v                 | -6.82 |
| SN12C                                                        |                        | -7.36                           |                       |              | -6.00                  |                           |  | v                 | -6.00 |
| TK-10                                                        |                        | -7.13                           |                       |              | -6.00                  |                           |  | v                 | -6.00 |
| UO-31                                                        |                        | -9.27                           |                       |              | -6.82                  |                           |  | v                 | -6.00 |
| -----                                                        |                        |                                 |                       |              |                        |                           |  |                   |       |
| Prostate Cancer                                              |                        |                                 |                       |              |                        |                           |  |                   |       |
| PC-3                                                         | ^                      | -10.00                          |                       |              | -6.76                  |                           |  | v                 | -6.00 |
| DU-145                                                       |                        | -6.71                           |                       |              | -6.00                  |                           |  | v                 | -6.00 |
| -----                                                        |                        |                                 |                       |              |                        |                           |  |                   |       |
| Breast Cancer                                                |                        |                                 |                       |              |                        |                           |  |                   |       |
| MCF7                                                         | ^                      | -10.00                          |                       |              | -6.93                  |                           |  | v v               | -6.00 |
| MDA-MB-231/ATCC                                              |                        | -8.91                           |                       |              | -6.00                  |                           |  | v v               | -6.00 |
| HS 578T                                                      | ^                      | -10.00                          |                       |              | -9.99                  |                           |  | v v               | -6.00 |
| BT-549                                                       | ^ ^                    | -10.00                          |                       |              | -6.27                  |                           |  | v v               | -6.00 |
| T-47D                                                        |                        | -7.90                           |                       |              | -6.00                  |                           |  | v v               | -6.00 |
| -----                                                        |                        |                                 |                       |              |                        |                           |  |                   |       |
| MID                                                          |                        |                                 |                       |              |                        |                           |  |                   |       |
| Delta                                                        |                        | -9.21                           |                       |              | -7.22                  |                           |  |                   | -6.29 |
| Range                                                        |                        | 0.79                            |                       |              | 2.78                   |                           |  |                   | 2.76  |
|                                                              |                        | 3.78                            |                       |              | 4.0                    |                           |  |                   | 3.05  |

All Cell Lines

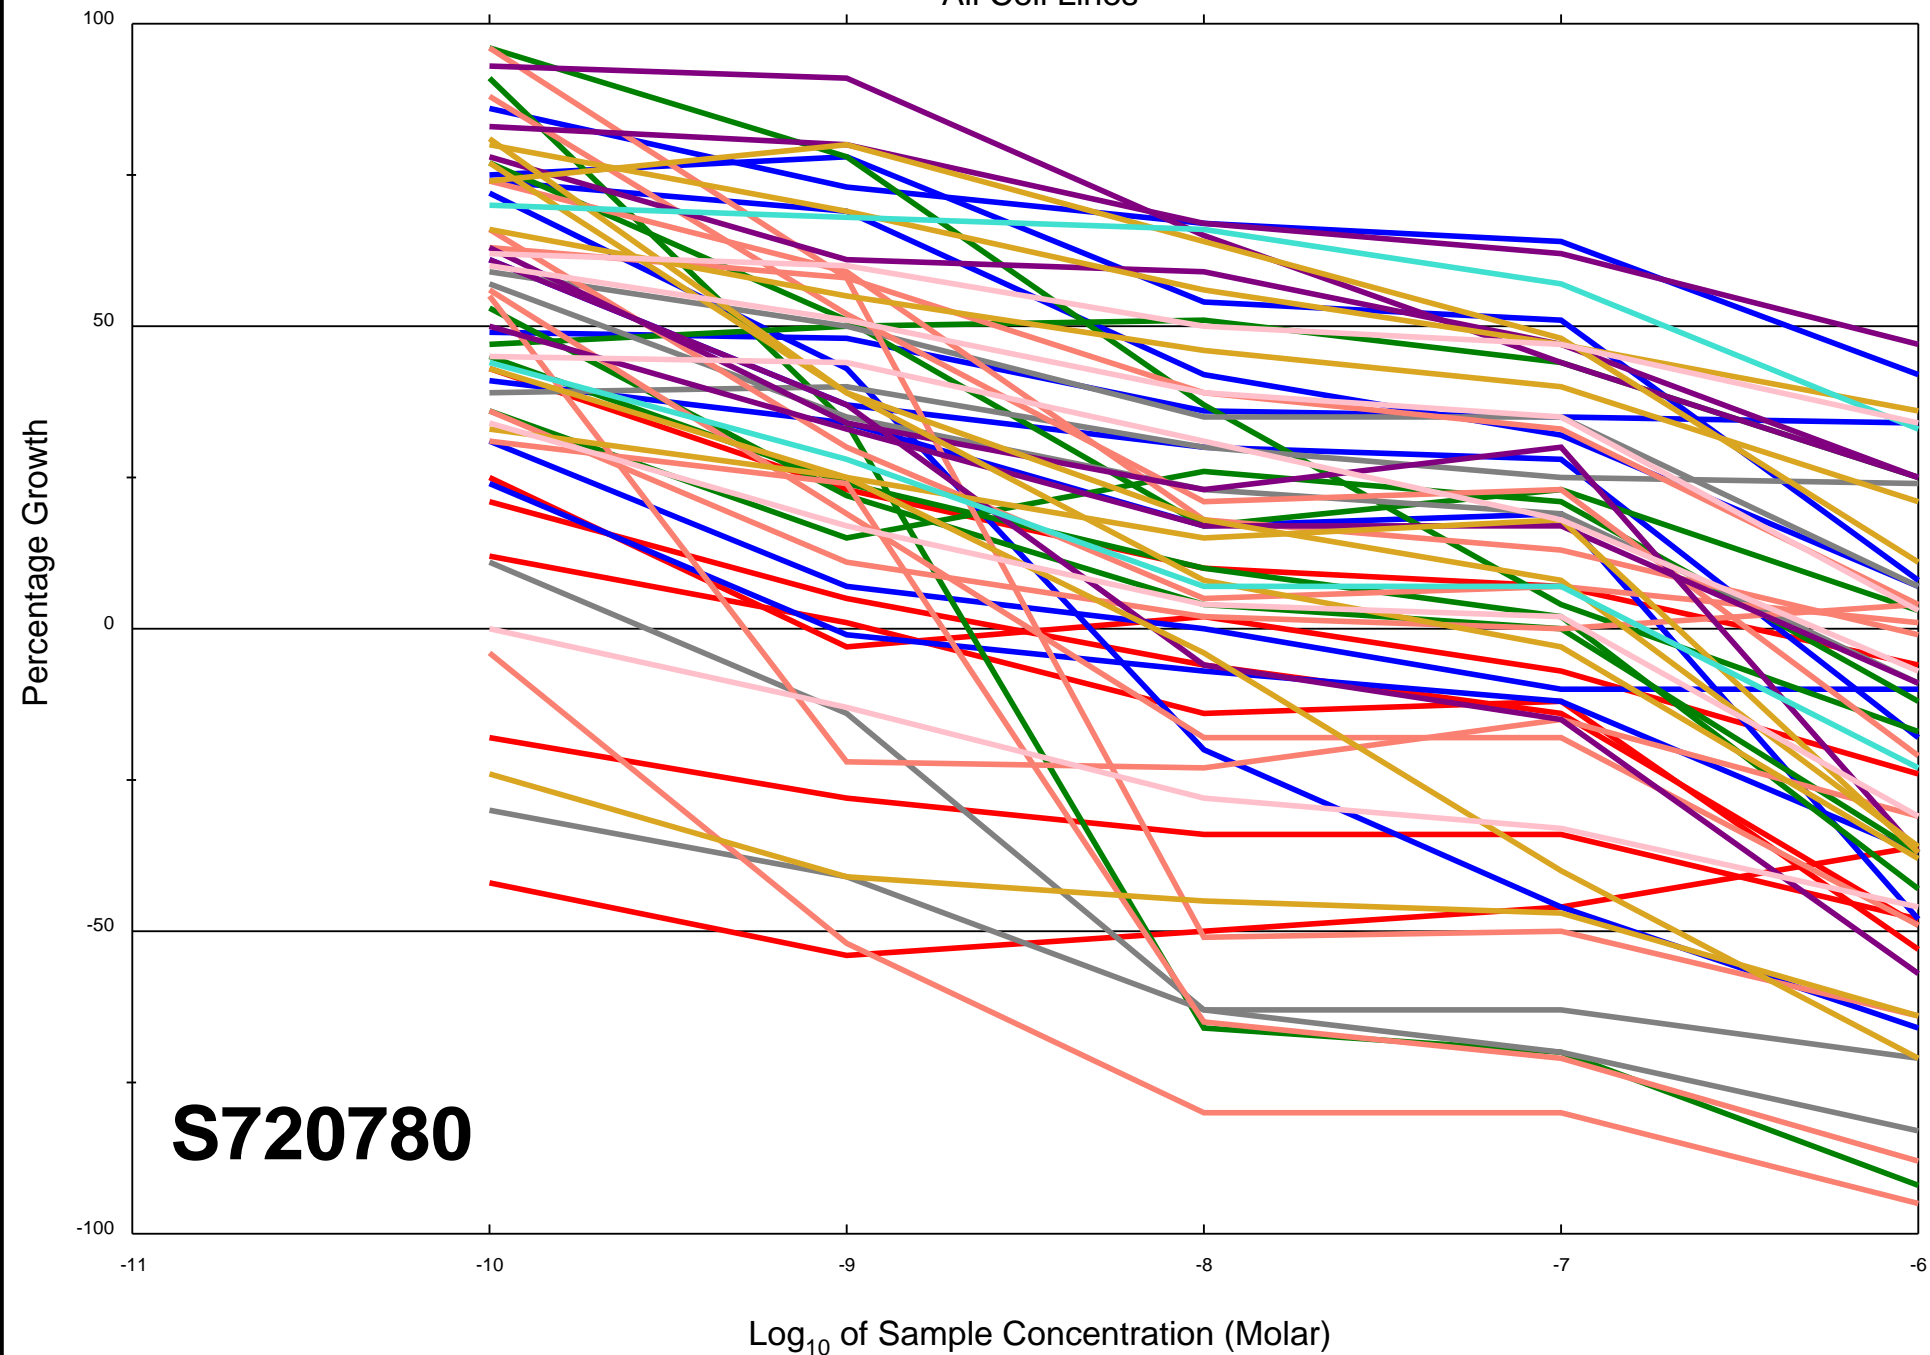

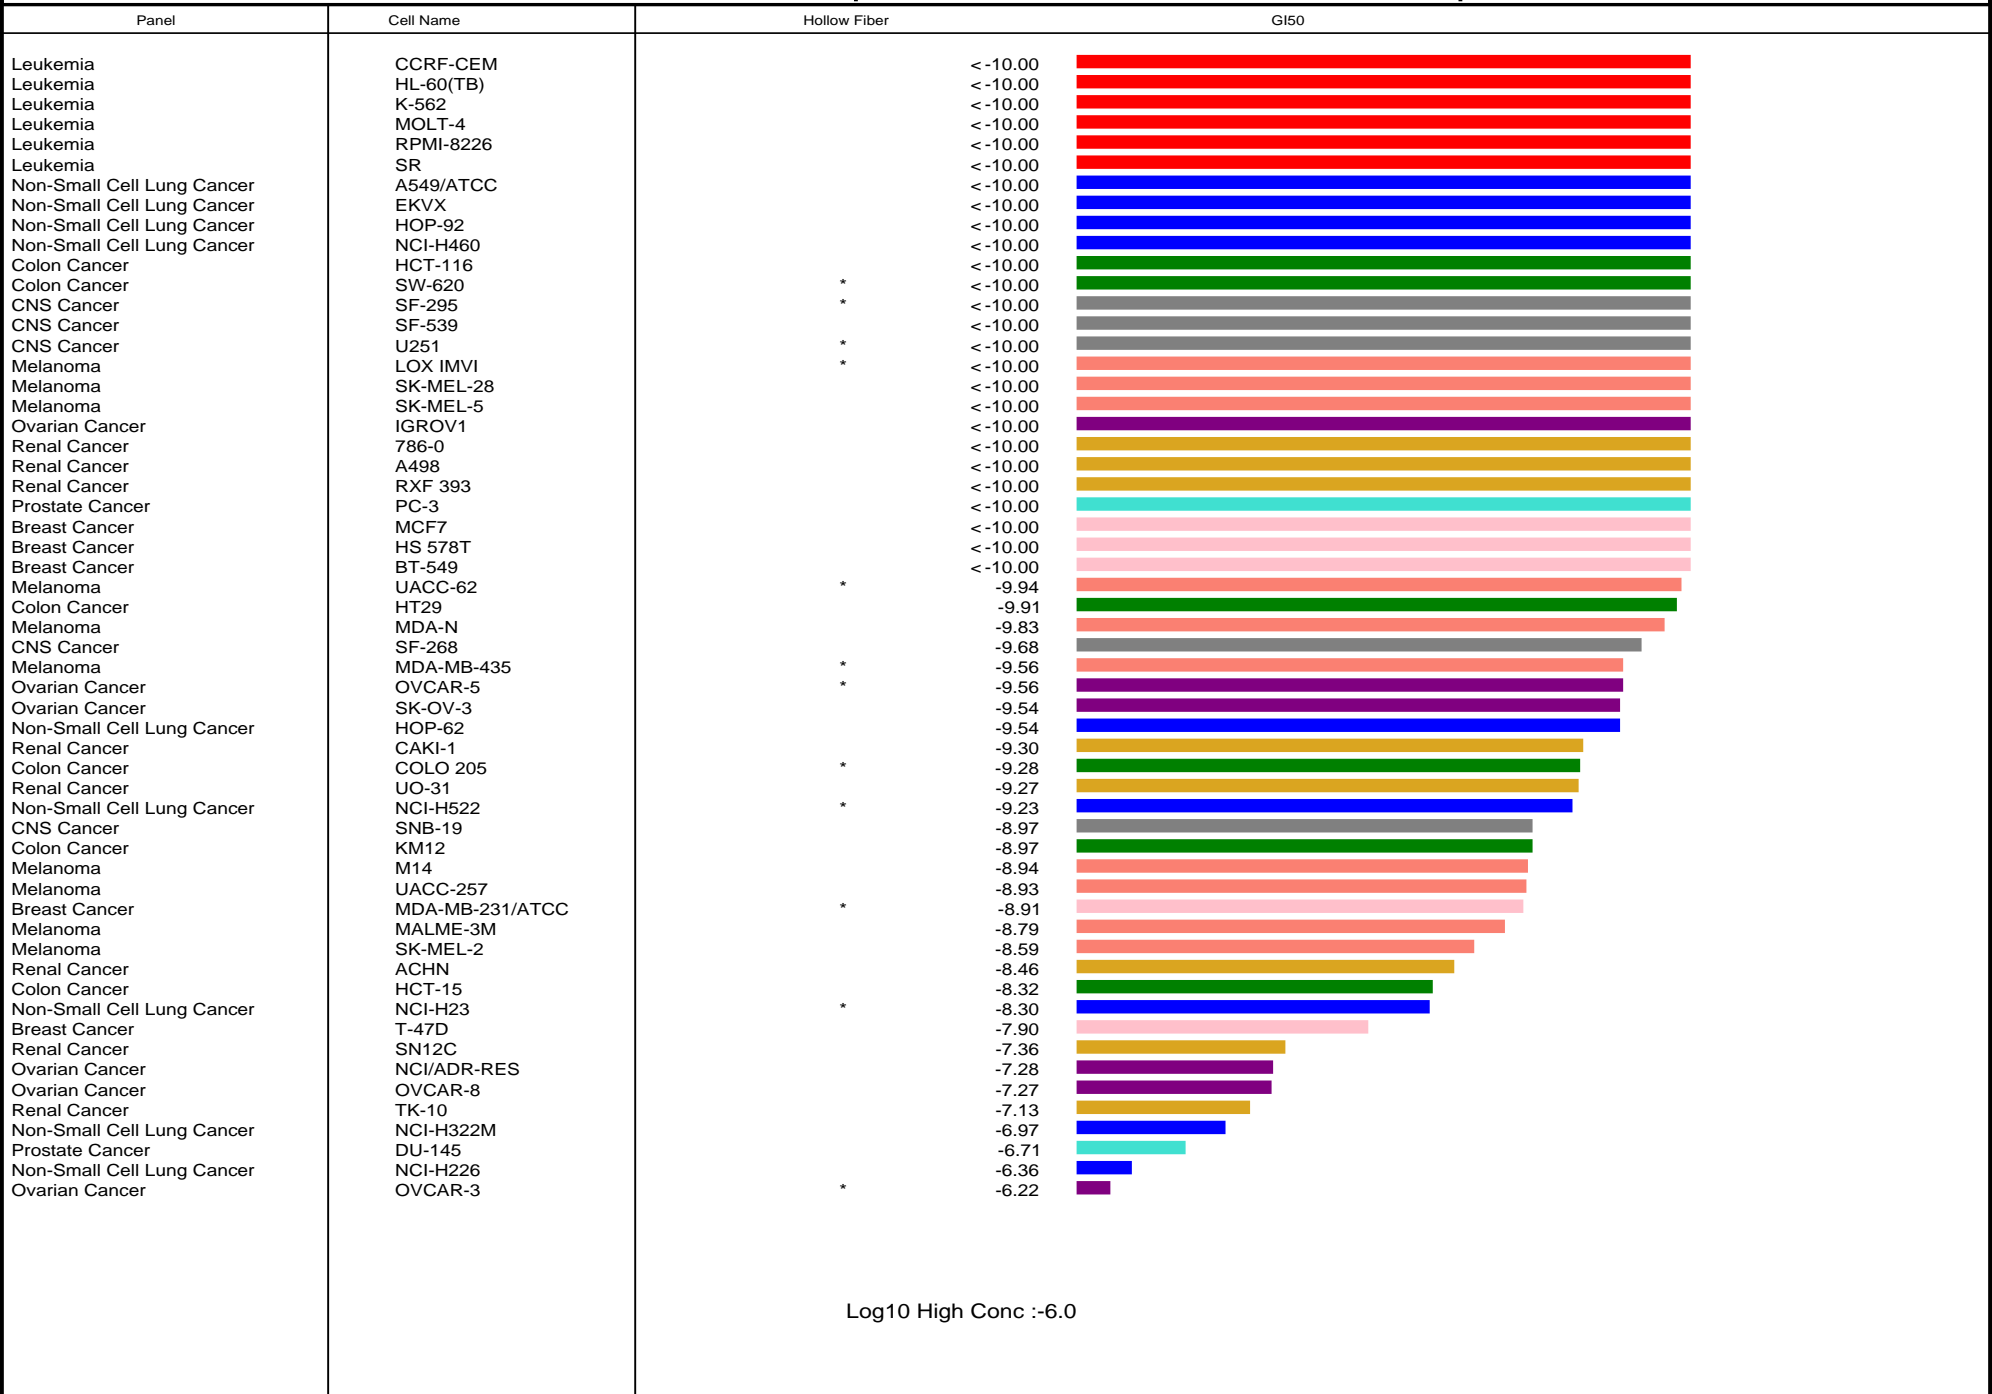

Log10 High Conc :-6.0

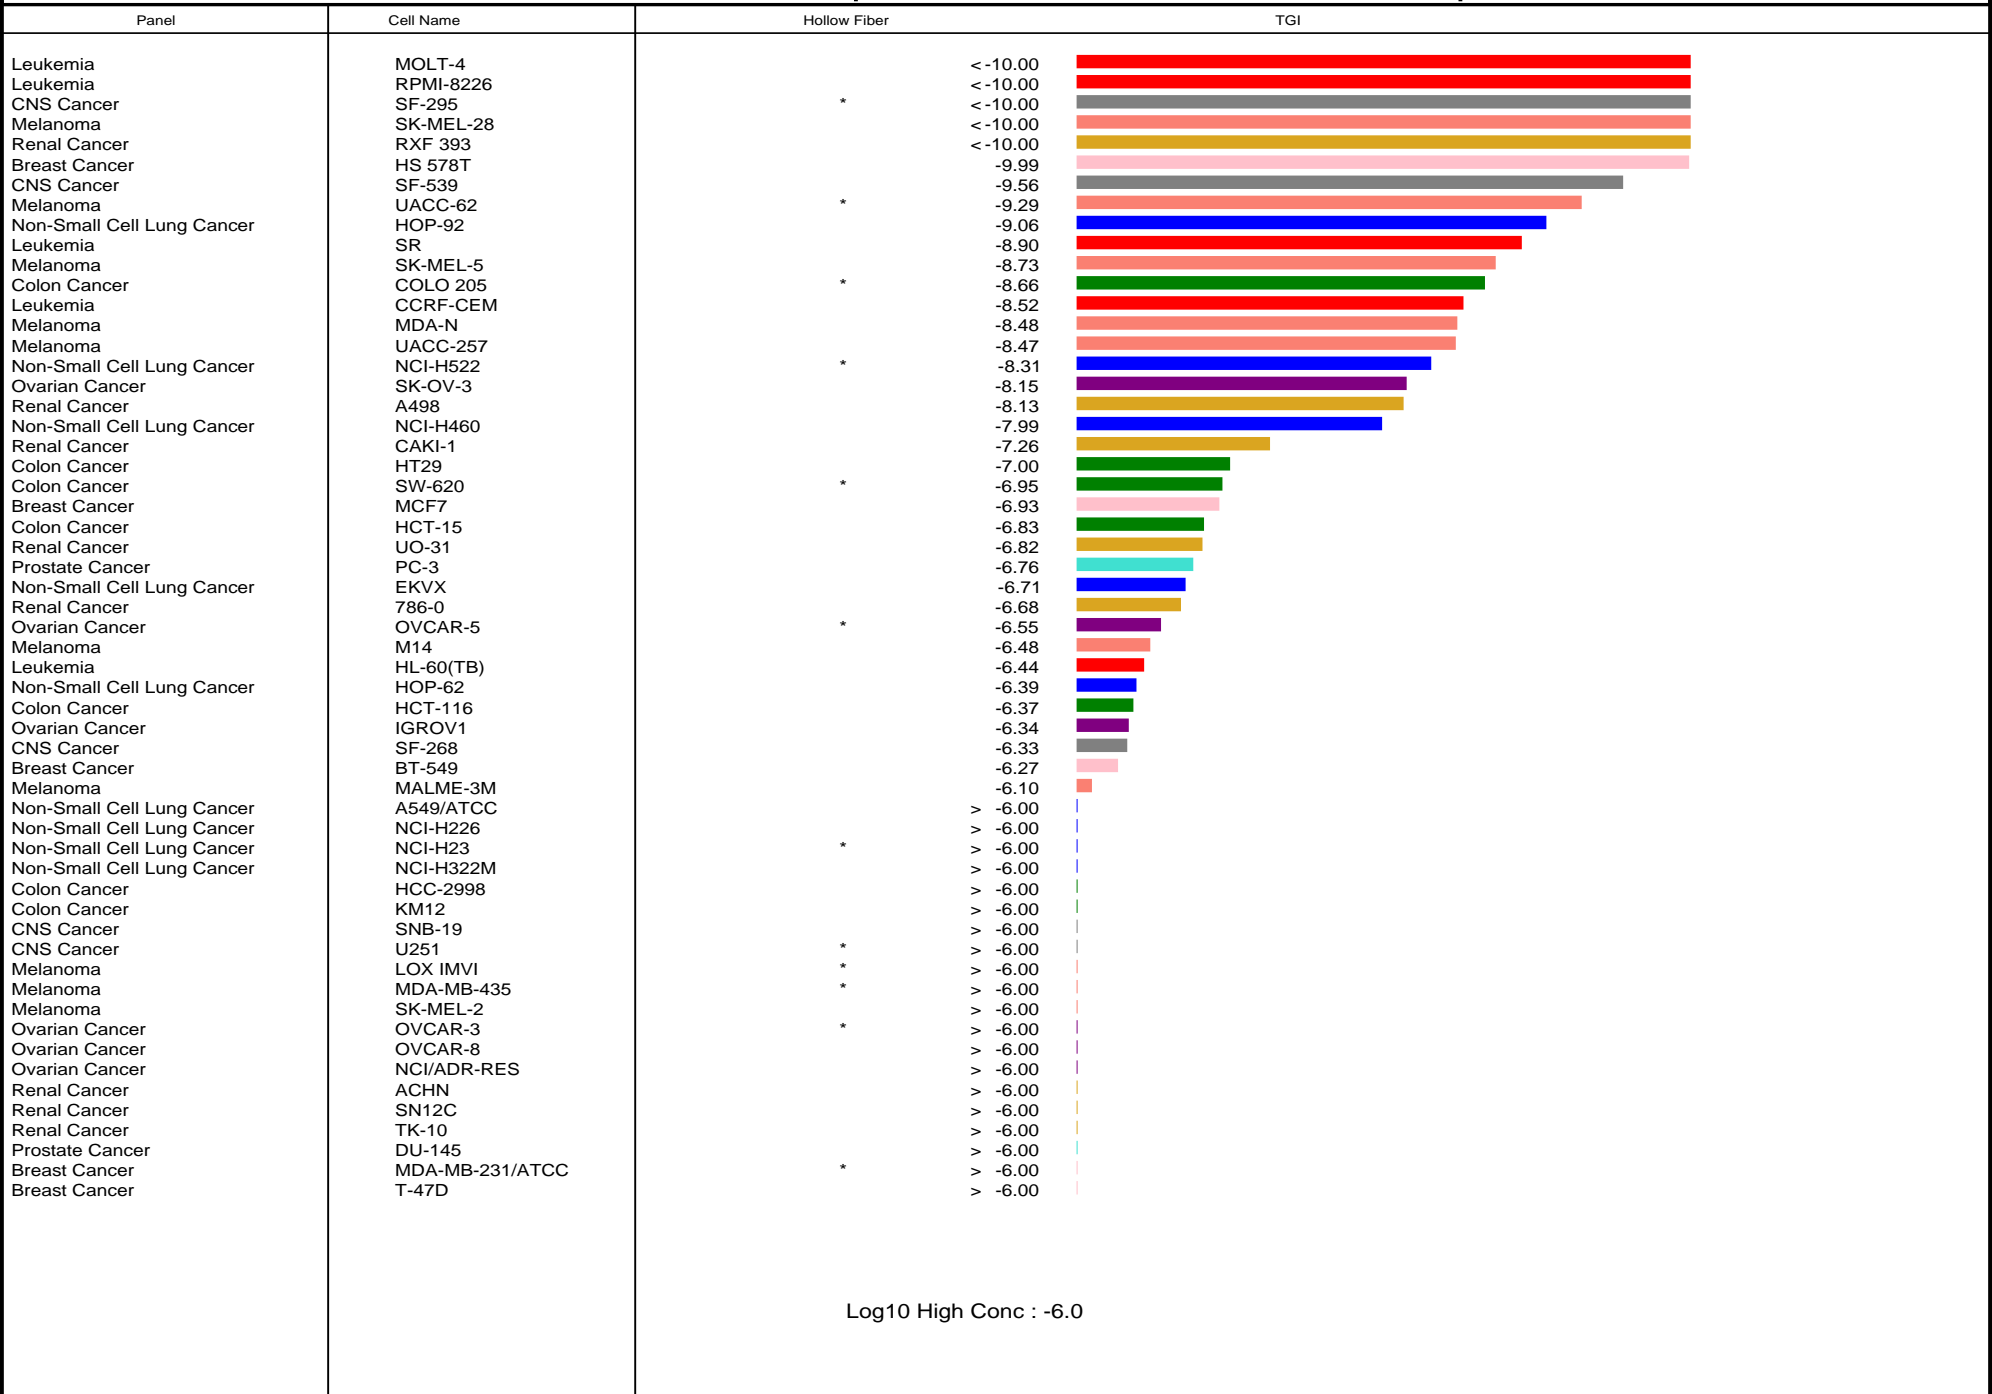

Log10 High Conc : -6.0

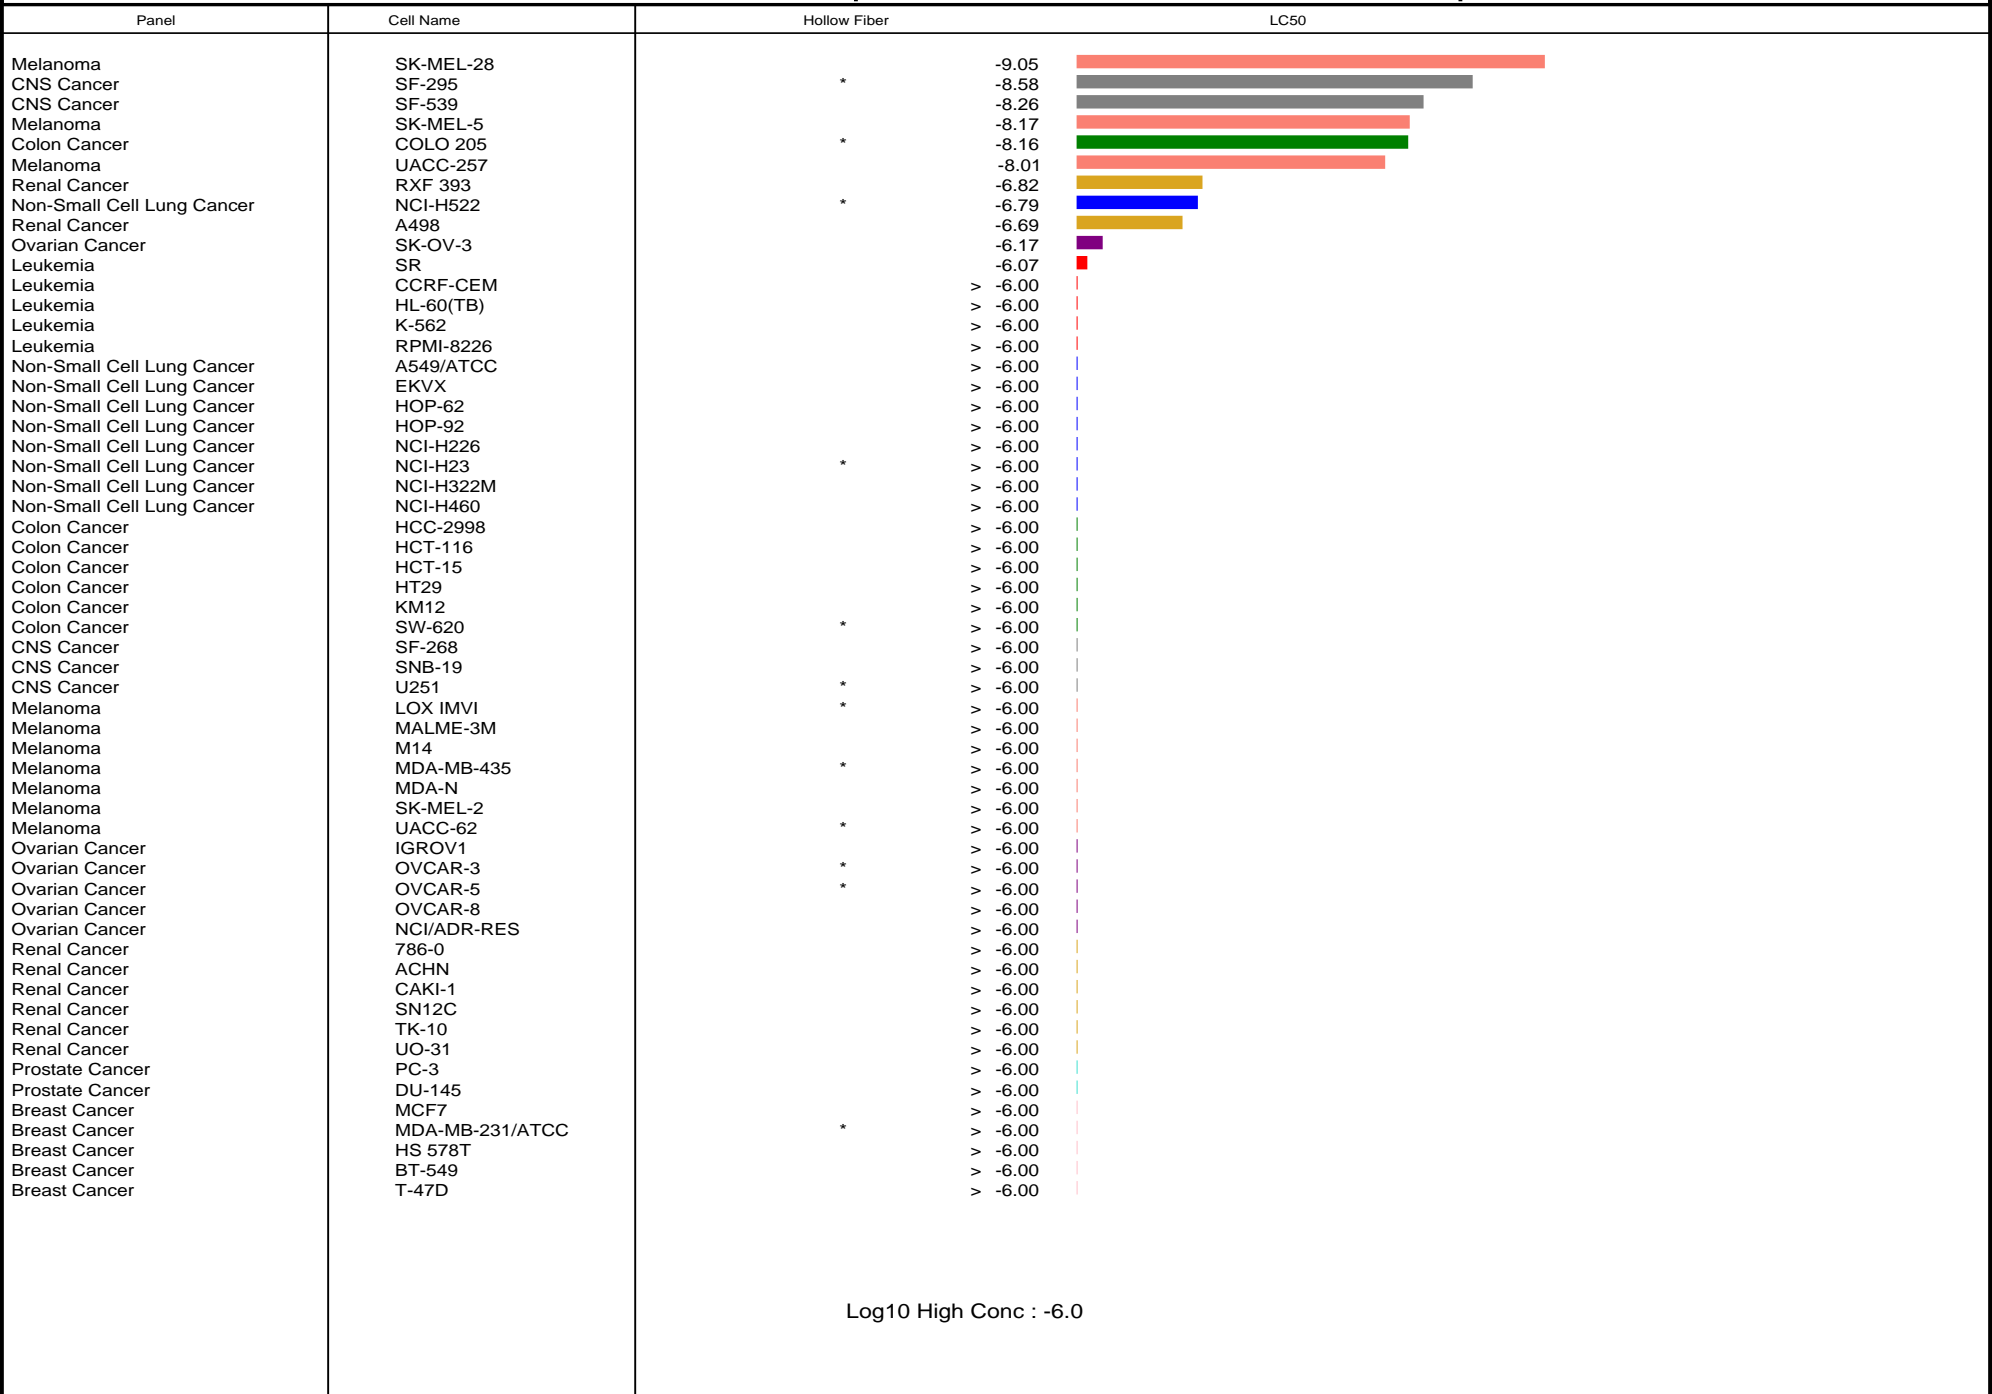

Log10 High Conc : -6.0



**National Cancer Institute Developmental Therapeutics Program  
In-Vitro Screening Data Review Checklist**

**NSC:** D - 720780 / 1

**Experiment ID:** 0104BS73

**Test Date:** April 02, 2001

**Review Date:**

Pending Action by the NCI for this experiment

1. \_\_\_\_\_ None
2. \_\_\_\_\_ Repeat testing in the Primary Screen
3. \_\_\_\_\_ Refer to Biological Evaluation Committee
4. \_\_\_\_\_ Currently under Review by Biological Evaluation Committee

# National Cancer Institute Developmental Therapeutics Program In-Vitro Testing Results

|                                  |                                       |                |               |
|----------------------------------|---------------------------------------|----------------|---------------|
| NSC : D - 720780 / 1             | Experiment ID : 0104BS73              | Test Type : 08 | Units : Molar |
| Report Date : September 01, 2011 | Test Date : April 02, 2001            | QNS :          | MC :          |
| COMI : 25EpiRitt (7334)          | Stain Reagent : SRB Dual-Pass Related | SSPL : 0GZS    |               |

| Panel/Cell Line                   | Log10 Concentration |       |                        |       |       |       |        |       |                |      |      |      |            |            |           |      |
|-----------------------------------|---------------------|-------|------------------------|-------|-------|-------|--------|-------|----------------|------|------|------|------------|------------|-----------|------|
|                                   | Time                |       | Mean Optical Densities |       |       |       |        |       | Percent Growth |      |      |      |            | GI50       | TGI       | LC50 |
|                                   | Zero                | Ctrl  | -10.0                  | -9.0  | -8.0  | -7.0  | -6.0   | -10.0 | -9.0           | -8.0 | -7.0 | -6.0 |            |            |           |      |
| <b>Leukemia</b>                   |                     |       |                        |       |       |       |        |       |                |      |      |      |            |            |           |      |
| CCRF-CEM                          | 0.282               | 0.692 | 0.445                  | 0.291 | 0.284 | 0.239 | 0.098  | 40    | 2              | .    | -15  | -65  | < 1.00E-10 | 1.07E-8    | 4.95E-7   |      |
| HL-60(TB)                         | 0.756               | 2.075 | 1.512                  | 1.351 | 1.105 | 1.059 | 0.754  | 57    | 45             | 26   | 23   | .    | 3.98E-10   | 9.68E-7    | > 1.00E-6 |      |
| K-562                             | 0.188               | 0.832 | 0.616                  | 0.381 | 0.187 | 0.124 | 0.029  | 66    | 30             | -1   | -34  | -85  | 2.81E-10   | 9.61E-9    | 2.05E-7   |      |
| MOLT-4                            | 0.503               | 1.375 | 0.545                  | 0.353 | 0.325 | 0.294 | 0.238  | 5     | -30            | -35  | -42  | -53  | < 1.00E-10 | 1.37E-10   | 5.65E-7   |      |
| RPMI-8226                         | 0.578               | 1.475 | 0.490                  | 0.463 | 0.425 | 0.380 | 0.231  | -15   | -20            | -26  | -34  | -60  | < 1.00E-10 | < 1.00E-10 | 4.08E-7   |      |
| SR                                | 0.482               | 0.993 | 0.468                  | 0.330 | 0.312 | 0.291 | 0.179  | -3    | -32            | -35  | -40  | -63  | < 1.00E-10 | < 1.00E-10 | 2.77E-7   |      |
| <b>Non-Small Cell Lung Cancer</b> |                     |       |                        |       |       |       |        |       |                |      |      |      |            |            |           |      |
| A549/ATCC                         | 0.262               | 0.693 | 0.386                  | 0.354 | 0.354 | 0.311 | 0.304  | 29    | 21             | 21   | 11   | 10   | < 1.00E-10 | > 1.00E-6  | > 1.00E-6 |      |
| EKVX                              | 0.224               | 0.516 | 0.378                  | 0.286 | 0.443 | 0.368 | 0.230  | 53    | 21             | 75   | 49   | 2    | .          | > 1.00E-6  | > 1.00E-6 |      |
| HOP-62                            | 0.469               | 1.066 | 0.882                  | 0.922 | 0.679 | 0.644 | 0.459  | 69    | 76             | 35   | 29   | -2   | 4.33E-9    | 8.49E-7    | > 1.00E-6 |      |
| HOP-92                            | 0.792               | 1.299 | 1.082                  | 0.918 | 0.909 | 0.793 | 0.637  | 57    | 25             | 23   | .    | -20  | 1.67E-10   | 1.02E-7    | > 1.00E-6 |      |
| NCI-H226                          | 0.693               | 1.418 | 1.309                  | 1.419 | 1.168 | 1.082 | 0.869  | 85    | 100            | 65   | 54   | 24   | 1.33E-7    | > 1.00E-6  | > 1.00E-6 |      |
| NCI-H23                           | 0.292               | 0.818 | 0.665                  | 0.617 | 0.481 | 0.417 | 0.219  | 71    | 62             | 36   | 24   | -25  | 2.86E-9    | 3.06E-7    | > 1.00E-6 |      |
| NCI-H322M                         | 0.577               | 1.081 | 0.998                  | 1.126 | 0.911 | 0.838 | 0.712  | 83    | 109            | 66   | 52   | 27   | 1.17E-7    | > 1.00E-6  | > 1.00E-6 |      |
| NCI-H460                          | 0.310               | 1.483 | 0.799                  | 0.469 | 0.217 | 0.135 | 0.119  | 42    | 14             | -30  | -56  | -62  | < 1.00E-10 | 2.04E-9    | 5.68E-8   |      |
| <b>Colon Cancer</b>               |                     |       |                        |       |       |       |        |       |                |      |      |      |            |            |           |      |
| COLO 205                          | 0.251               | 0.887 | 0.907                  | 0.672 | 0.040 | 0.017 | -0.072 | 103   | 66             | -84  | -93  | -100 | 1.28E-9    | 2.75E-9    | 5.92E-9   |      |
| HCT-116                           | 0.081               | 0.537 | 0.337                  | 0.245 | 0.250 | 0.207 | 0.066  | 56    | 36             | 37   | 28   | -19  | 2.03E-10   | 3.90E-7    | > 1.00E-6 |      |
| HCT-15                            | 0.297               | 0.989 | 1.025                  | 0.978 | 0.635 | 0.276 | 0.053  | 105   | 98             | 49   | -7   | -82  | 9.45E-9    | 7.47E-8    | 3.72E-7   |      |
| HT29                              | 0.215               | 0.978 | 0.738                  | 0.687 | 0.464 | 0.413 | 0.223  | 69    | 62             | 33   | 26   | 1    | 2.53E-9    | > 1.00E-6  | > 1.00E-6 |      |
| KM12                              | 0.316               | 1.072 | 0.979                  | 0.656 | 0.409 | 0.283 | 0.225  | 88    | 45             | 12   | -11  | -29  | 7.62E-10   | 3.44E-8    | > 1.00E-6 |      |
| SW-620                            | 0.172               | 0.807 | 0.500                  | 0.253 | 0.106 | 0.080 | -0.079 | 52    | 13             | -38  | -53  | -100 | 1.10E-10   | 1.77E-9    | 5.88E-8   |      |
| <b>CNS Cancer</b>                 |                     |       |                        |       |       |       |        |       |                |      |      |      |            |            |           |      |
| SF-268                            | 0.381               | 1.022 | 0.718                  | 0.631 | 0.536 | 0.424 | 0.271  | 53    | 39             | 24   | 7    | -29  | 1.55E-10   | 1.54E-7    | > 1.00E-6 |      |
| SF-295                            | 0.250               | 0.989 | 0.407                  | 0.429 | 0.249 | 0.203 | 0.099  | 21    | 24             | .    | -19  | -61  | < 1.00E-10 | 9.63E-9    | 5.58E-7   |      |
| SF-539                            | 0.766               | 1.835 | 1.042                  | 0.733 | 0.335 | 0.168 | 0.079  | 26    | -4             | -56  | -78  | -90  | < 1.00E-10 | 7.16E-10   | 7.57E-9   |      |
| SNB-19                            | 0.365               | 1.148 | 1.051                  | 0.889 | 0.816 | 0.802 | 0.500  | 88    | 67             | 58   | 56   | 17   | 1.41E-7    | > 1.00E-6  | > 1.00E-6 |      |
| U251                              | 0.285               | 0.671 | 0.368                  | 0.329 | 0.298 | 0.207 | 0.163  | 21    | 11             | 3    | -28  | -43  | < 1.00E-10 | 1.27E-8    | > 1.00E-6 |      |
| <b>Melanoma</b>                   |                     |       |                        |       |       |       |        |       |                |      |      |      |            |            |           |      |
| LOX IMVI                          | 0.275               | 0.844 | 0.242                  | 0.128 | 0.078 | 0.080 | 0.022  | -12   | -54            | -72  | -71  | -92  | < 1.00E-10 | < 1.00E-10 | 8.18E-10  |      |
| MALME-3M                          | 0.664               | 1.116 | 1.078                  | 0.998 | 0.758 | 0.765 | 0.706  | 92    | 74             | 21   | 22   | 9    | 2.81E-9    | > 1.00E-6  | > 1.00E-6 |      |
| M14                               | 0.266               | 0.684 | 0.659                  | 0.628 | 0.460 | 0.255 | 0.135  | 94    | 86             | 46   | -4   | -49  | 8.12E-9    | 8.28E-8    | > 1.00E-6 |      |
| MDA-MB-435                        | 0.490               | 1.289 | 1.180                  | 0.618 | 0.259 | 0.304 | 0.194  | 86    | 16             | -47  | -38  | -60  | 3.28E-10   | 1.79E-9    | 3.44E-7   |      |
| MDA-N                             | 0.298               | 1.115 | 0.827                  | 0.550 | 0.039 | 0.042 | -0.085 | 65    | 31             | -87  | -86  | -100 | 2.71E-10   | 1.83E-9    | 4.86E-9   |      |
| SK-MEL-2                          | 0.304               | 0.555 | 0.385                  | 0.339 | 0.301 | 0.253 | 0.083  | 32    | 14             | -1   | -17  | -73  | < 1.00E-10 | 8.39E-9    | 3.93E-7   |      |
| SK-MEL-28                         | 0.427               | 0.941 | 0.705                  | 0.504 | 0.064 | 0.059 | -0.083 | 54    | 15             | -85  | -86  | -100 | 1.26E-10   | 1.41E-9    | 4.46E-9   |      |
| SK-MEL-5                          | 0.356               | 1.338 | 0.858                  | 0.591 | 0.091 | 0.021 | -0.100 | 51    | 24             | -75  | -94  | -100 | 1.10E-10   | 1.75E-9    | 5.63E-9   |      |
| UACC-257                          | 0.809               | 1.544 | 1.490                  | 1.370 | 0.246 | 0.239 | 0.092  | 93    | 76             | -70  | -71  | -89  | 1.52E-9    | 3.34E-9    | 7.34E-9   |      |
| UACC-62                           | 0.616               | 1.375 | 0.770                  | 0.383 | 0.242 | 0.196 | 0.175  | 20    | -38            | -61  | -68  | -72  | < 1.00E-10 | 2.23E-10   | 3.40E-9   |      |
| <b>Ovarian Cancer</b>             |                     |       |                        |       |       |       |        |       |                |      |      |      |            |            |           |      |
| OVCAR-3                           | 0.542               | 0.817 | 0.753                  | 0.676 | 0.661 | 0.679 | 0.485  | 77    | 49             | 43   | 50   | -11  | 8.91E-10   | 6.70E-7    | > 1.00E-6 |      |
| OVCAR-5                           | 0.233               | 0.618 | 0.696                  | 0.473 | 0.391 | 0.400 | 0.168  | 120   | 62             | 41   | 43   | -28  | 3.82E-9    | 4.06E-7    | > 1.00E-6 |      |
| OVCAR-8                           | 0.420               | 1.055 | 0.998                  | 0.940 | 0.897 | 0.868 | 0.639  | 91    | 82             | 75   | 71   | 34   | 3.70E-7    | > 1.00E-6  | > 1.00E-6 |      |
| NCI/ADR-RES                       | 0.470               | 1.240 | 1.220                  | 1.267 | 1.078 | 0.906 | 0.757  | 97    | 103            | 79   | 57   | 37   | 2.18E-7    | > 1.00E-6  | > 1.00E-6 |      |
| SK-OV-3                           | 0.406               | 0.850 | 0.734                  | 0.667 | 0.377 | 0.322 | 0.121  | 74    | 59             | -7   | -21  | -70  | 1.36E-9    | 7.76E-9    | 3.89E-7   |      |
| <b>Renal Cancer</b>               |                     |       |                        |       |       |       |        |       |                |      |      |      |            |            |           |      |
| 786-0                             | 0.357               | 1.158 | 0.820                  | 0.716 | 0.697 | 0.552 | 0.400  | 58    | 45             | 42   | 24   | 5    | 4.00E-10   | > 1.00E-6  | > 1.00E-6 |      |
| A498                              | 0.888               | 1.511 | 1.328                  | 1.206 | 0.901 | 0.438 | 0.141  | 71    | 51             | 2    | -51  | -84  | 1.05E-9    | 1.09E-8    | 9.69E-8   |      |
| ACHN                              | 0.438               | 1.308 | 1.034                  | 0.995 | 0.882 | 0.801 | 0.569  | 68    | 64             | 51   | 42   | 15   | 1.28E-8    | > 1.00E-6  | > 1.00E-6 |      |
| RXF 393                           | 0.665               | 0.952 | 0.362                  | 0.227 | 0.098 | 0.091 | 0.184  | -46   | -66            | -85  | -86  | -72  | < 1.00E-10 | < 1.00E-10 | 1.65E-10  |      |
| SN12C                             | 0.426               | 1.121 | 1.207                  | 0.985 | 0.929 | 0.864 | 0.826  | 112   | 80             | 72   | 63   | 58   | > 1.00E-6  | > 1.00E-6  | > 1.00E-6 |      |
| TK-10                             | 0.664               | 1.203 | 1.211                  | 1.233 | 1.144 | 0.883 | 0.812  | 101   | 106            | 89   | 41   | 27   | 6.41E-8    | > 1.00E-6  | > 1.00E-6 |      |
| UO-31                             | 0.371               | 0.995 | 0.653                  | 0.350 | 0.138 | 0.023 | 0.007  | 45    | -6             | -63  | -94  | -98  | < 1.00E-10 | 7.70E-10   | 5.94E-9   |      |
| <b>Prostate Cancer</b>            |                     |       |                        |       |       |       |        |       |                |      |      |      |            |            |           |      |
| PC-3                              | 0.336               | 1.032 | 0.640                  | 0.502 | 0.344 | 0.336 | 0.232  | 44    | 24             | 1    | .    | -31  | < 1.00E-10 | 1.00E-7    | > 1.00E-6 |      |
| DU-145                            | 0.240               | 0.628 | 0.374                  | 0.325 | 0.433 | 0.420 | 0.236  | 34    | 22             | 50   | 46   | -2   | < 1.00E-10 | 9.23E-7    | > 1.00E-6 |      |
| <b>Breast Cancer</b>              |                     |       |                        |       |       |       |        |       |                |      |      |      |            |            |           |      |
| MCF7                              | 0.301               | 0.784 | 0.417                  | 0.356 | 0.168 | 0.105 | -0.047 | 24    | 11             | -44  | -65  | -100 | < 1.00E-10 | 1.60E-9    | 1.90E-8   |      |
| MDA-MB-231/ATCC                   | 0.398               | 0.728 | 0.667                  | 0.664 | 0.602 | 0.619 | 0.482  | 81    | 81             | 62   | 67   | 25   | 2.56E-7    | > 1.00E-6  | > 1.00E-6 |      |
| HS 578T                           | 0.493               | 1.068 | 0.581                  | 0.534 | 0.397 | 0.407 | 0.283  | 15    | 7              | -20  | -18  | -43  | < 1.00E-10 | 1.84E-9    | > 1.00E-6 |      |

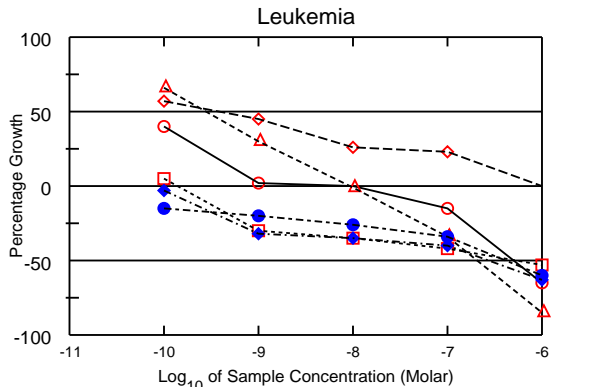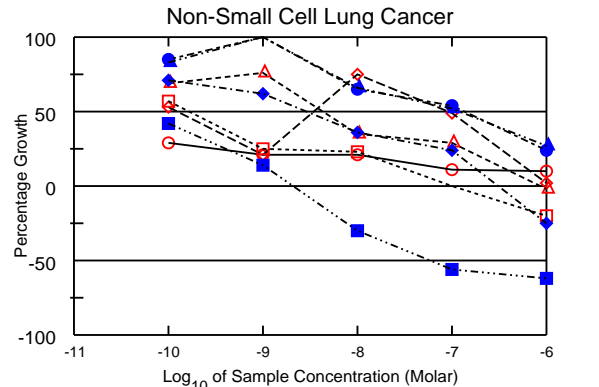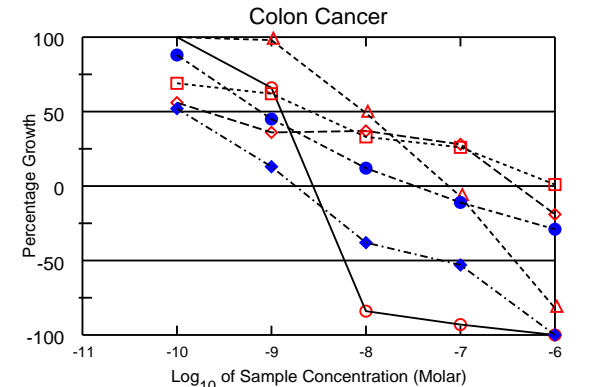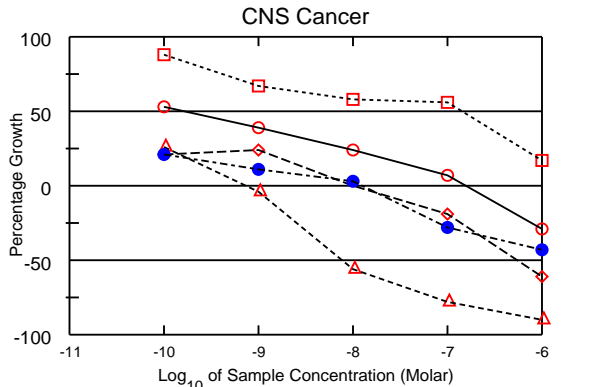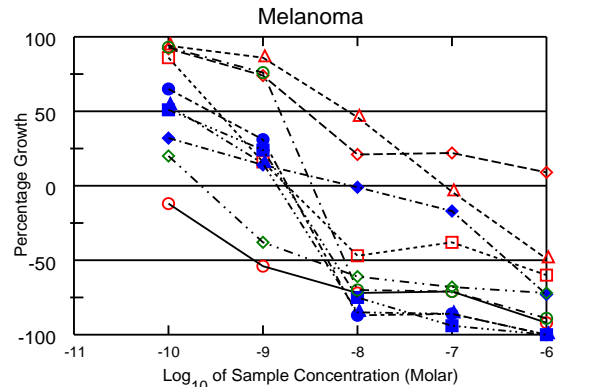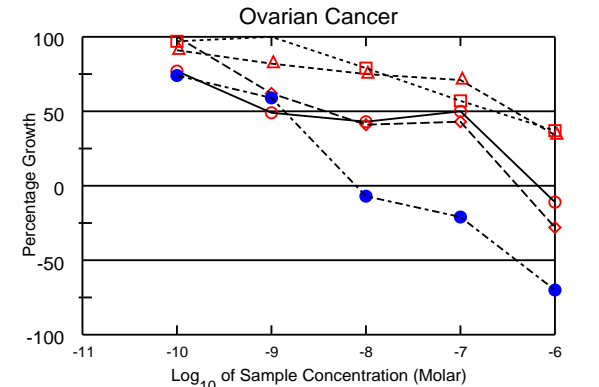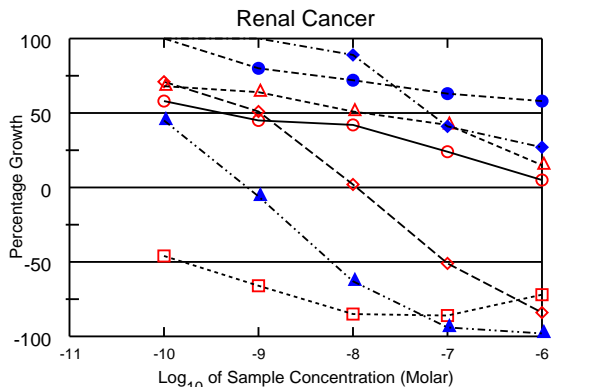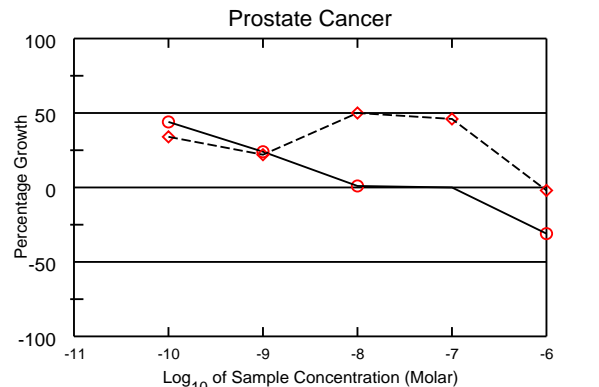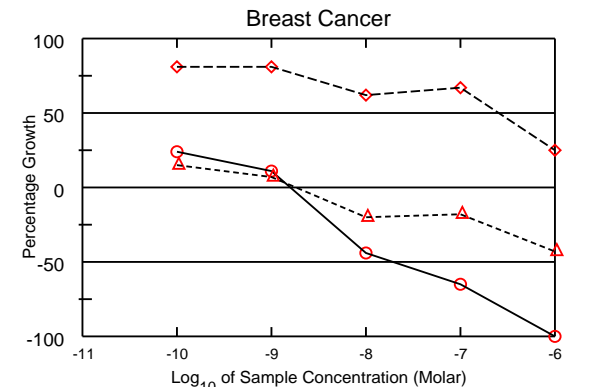

| National Cancer Institute Developmental Therapeutics Program |                        | NSC : D - 720780/1              |                       | Units :Molar |                        | SSPL :0GZS                |  | EXP. ID :0104BS73 |  |
|--------------------------------------------------------------|------------------------|---------------------------------|-----------------------|--------------|------------------------|---------------------------|--|-------------------|--|
| Mean Graphs                                                  |                        | Report Date :September 01, 2011 |                       |              |                        | Test Date :April 02, 2001 |  |                   |  |
| Panel/Cell Line                                              | Log <sub>10</sub> GI50 | GI50                            | Log <sub>10</sub> TGI | TGI          | Log <sub>10</sub> LC50 | LC50                      |  |                   |  |
| Leukemia                                                     |                        |                                 |                       |              |                        |                           |  |                   |  |
| CCRF-CEM                                                     | < -10.00               |                                 | -7.97                 |              | -6.30                  |                           |  |                   |  |
| HL-60(TB)                                                    | -9.40                  |                                 | -6.01                 |              | -6.00                  |                           |  |                   |  |
| K-562                                                        | -9.55                  |                                 | -8.02                 |              | > -6.69                |                           |  |                   |  |
| MOLT-4                                                       | >>> -10.00             |                                 | -9.86                 |              | -6.25                  |                           |  |                   |  |
| RPMI-8226                                                    | >>> -10.00             |                                 | -10.00                |              | -6.39                  |                           |  |                   |  |
| SR                                                           | >>> -10.00             |                                 | >> -10.00             |              | -6.56                  |                           |  |                   |  |
| Non-Small Cell Lung Cancer                                   |                        |                                 |                       |              |                        |                           |  |                   |  |
| A549/ATCC                                                    | < -10.00               |                                 | > -6.00               |              | > -6.00                |                           |  |                   |  |
| EKVX                                                         |                        |                                 | > -6.00               |              | > -6.00                |                           |  |                   |  |
| HOP-62                                                       | -8.36                  |                                 | > -6.07               |              | > -6.00                |                           |  |                   |  |
| HOP-92                                                       | -9.78                  |                                 | > -6.99               |              | > -6.00                |                           |  |                   |  |
| NCI-H226                                                     | -6.88                  |                                 | > -6.00               |              | > -6.00                |                           |  |                   |  |
| NCI-H23                                                      | -8.54                  |                                 | > -6.51               |              | > -6.00                |                           |  |                   |  |
| NCI-H322M                                                    | -6.93                  |                                 | > -6.00               |              | > -6.00                |                           |  |                   |  |
| NCI-H460                                                     | < -10.00               |                                 | > -8.69               |              | > -7.25                |                           |  |                   |  |
| Colon Cancer                                                 |                        |                                 |                       |              |                        |                           |  |                   |  |
| COLO 205                                                     | -8.89                  |                                 | -8.56                 |              | -8.23                  |                           |  |                   |  |
| HCT-116                                                      | -9.69                  |                                 | -6.41                 |              | > -6.00                |                           |  |                   |  |
| HCT-15                                                       | -8.02                  |                                 | -7.13                 |              | > -6.43                |                           |  |                   |  |
| HT29                                                         | -8.60                  |                                 | > -6.00               |              | > -6.00                |                           |  |                   |  |
| KM12                                                         | -9.12                  |                                 | > -7.46               |              | > -6.00                |                           |  |                   |  |
| SW-620                                                       | -9.96                  |                                 | -8.75                 |              | > -7.23                |                           |  |                   |  |
| CNS Cancer                                                   |                        |                                 |                       |              |                        |                           |  |                   |  |
| SF-268                                                       | -9.81                  |                                 | -6.81                 |              | > -6.00                |                           |  |                   |  |
| SF-295                                                       | >> -10.00              |                                 | -8.02                 |              | > -6.25                |                           |  |                   |  |
| SF-539                                                       | >> -10.00              |                                 | -9.15                 |              | > -8.12                |                           |  |                   |  |
| SNB-19                                                       | -6.85                  |                                 | > -6.00               |              | > -6.00                |                           |  |                   |  |
| U251                                                         | < -10.00               |                                 | > -7.89               |              | > -6.00                |                           |  |                   |  |
| Melanoma                                                     |                        |                                 |                       |              |                        |                           |  |                   |  |
| LOX IMVI                                                     | < -10.00               |                                 | < -10.00              |              | -9.09                  |                           |  |                   |  |
| MALME-3M                                                     | -8.55                  |                                 | > -6.00               |              | > -6.00                |                           |  |                   |  |
| M14                                                          | -8.09                  |                                 | -7.08                 |              | > -6.00                |                           |  |                   |  |
| MDA-MB-435                                                   | -9.48                  |                                 | -8.75                 |              | > -6.46                |                           |  |                   |  |
| MDA-N                                                        | -9.57                  |                                 | -8.74                 |              | -8.31                  |                           |  |                   |  |
| SK-MEL-2                                                     | < -10.00               |                                 | -8.08                 |              | -6.41                  |                           |  |                   |  |
| SK-MEL-28                                                    | -9.90                  |                                 | -8.85                 |              | -8.35                  |                           |  |                   |  |
| SK-MEL-5                                                     | -9.96                  |                                 | -8.76                 |              | -8.25                  |                           |  |                   |  |
| UACC-257                                                     | -8.82                  |                                 | -8.48                 |              | -8.13                  |                           |  |                   |  |
| UACC-62                                                      | < -10.00               |                                 | -9.65                 |              | -8.47                  |                           |  |                   |  |
| Ovarian Cancer                                               |                        |                                 |                       |              |                        |                           |  |                   |  |
| OVCAR-3                                                      | -9.05                  |                                 | -6.17                 |              | > -6.00                |                           |  |                   |  |
| OVCAR-5                                                      | -8.42                  |                                 | -6.39                 |              | > -6.00                |                           |  |                   |  |
| OVCAR-8                                                      | -6.43                  |                                 | -6.00                 |              | > -6.00                |                           |  |                   |  |
| NCI/ADR-RES                                                  | -6.66                  |                                 | > -6.00               |              | > -6.00                |                           |  |                   |  |
| SK-OV-3                                                      | -8.87                  |                                 | > -8.11               |              | > -6.41                |                           |  |                   |  |
| Renal Cancer                                                 |                        |                                 |                       |              |                        |                           |  |                   |  |
| 786-0                                                        | -9.40                  |                                 | > -6.00               |              | > -6.00                |                           |  |                   |  |
| A498                                                         | -8.98                  |                                 | -7.96                 |              | > -7.01                |                           |  |                   |  |
| ACHN                                                         | -7.89                  |                                 | -6.00                 |              | > -6.00                |                           |  |                   |  |
| RXF 393                                                      | >> -10.00              |                                 | >>> -10.00            |              | > -9.78                |                           |  |                   |  |
| SN12C                                                        | -6.00                  |                                 | >>> -6.00             |              | > -6.00                |                           |  |                   |  |
| TK-10                                                        | -7.19                  |                                 | >>> -6.00             |              | > -6.00                |                           |  |                   |  |
| UO-31                                                        | < -10.00               |                                 | >>> -9.11             |              | > -8.23                |                           |  |                   |  |
| Prostate Cancer                                              |                        |                                 |                       |              |                        |                           |  |                   |  |
| PC-3                                                         | < -10.00               |                                 | -7.00                 |              | > -6.00                |                           |  |                   |  |
| DU-145                                                       | < -10.00               |                                 | -6.03                 |              | > -6.00                |                           |  |                   |  |
| Breast Cancer                                                |                        |                                 |                       |              |                        |                           |  |                   |  |
| MCF7                                                         | < -10.00               |                                 | -8.80                 |              | > -7.72                |                           |  |                   |  |
| MDA-MB-231/ATCC                                              | -6.59                  |                                 | > -6.00               |              | > -6.00                |                           |  |                   |  |
| HS 578T                                                      | < -10.00               |                                 | -8.74                 |              | > -6.00                |                           |  |                   |  |
| Summary Statistics                                           |                        |                                 |                       |              |                        |                           |  |                   |  |
| MID                                                          | -9.02                  |                                 | -7.52                 |              | -6.66                  |                           |  |                   |  |
| Delta                                                        | 0.98                   |                                 | 2.48                  |              | 3.12                   |                           |  |                   |  |
| Range                                                        | 4.0                    |                                 | 4.0                   |              | 3.78                   |                           |  |                   |  |

All Cell Lines

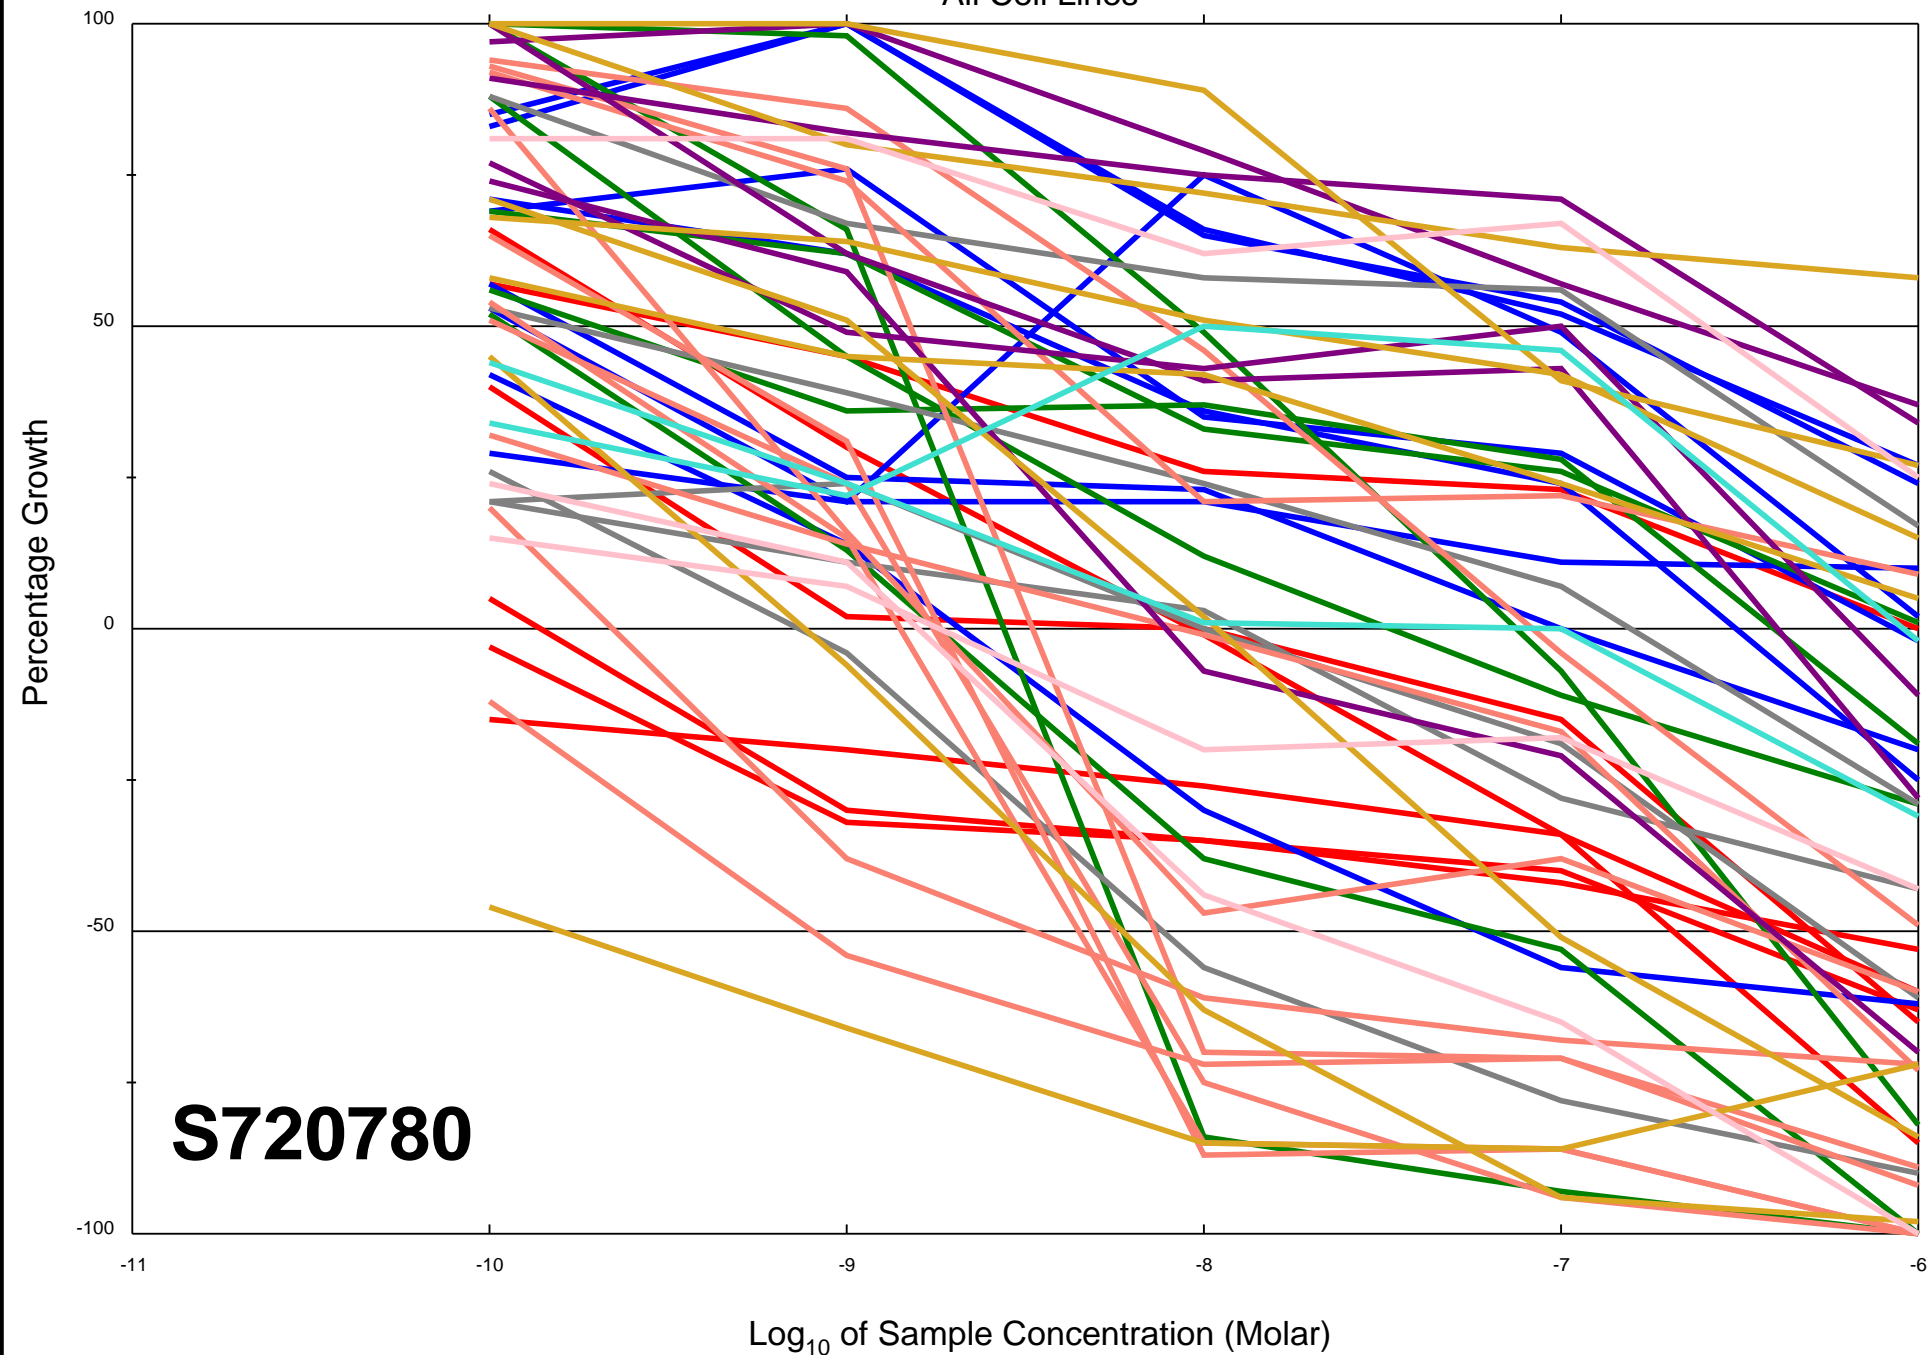

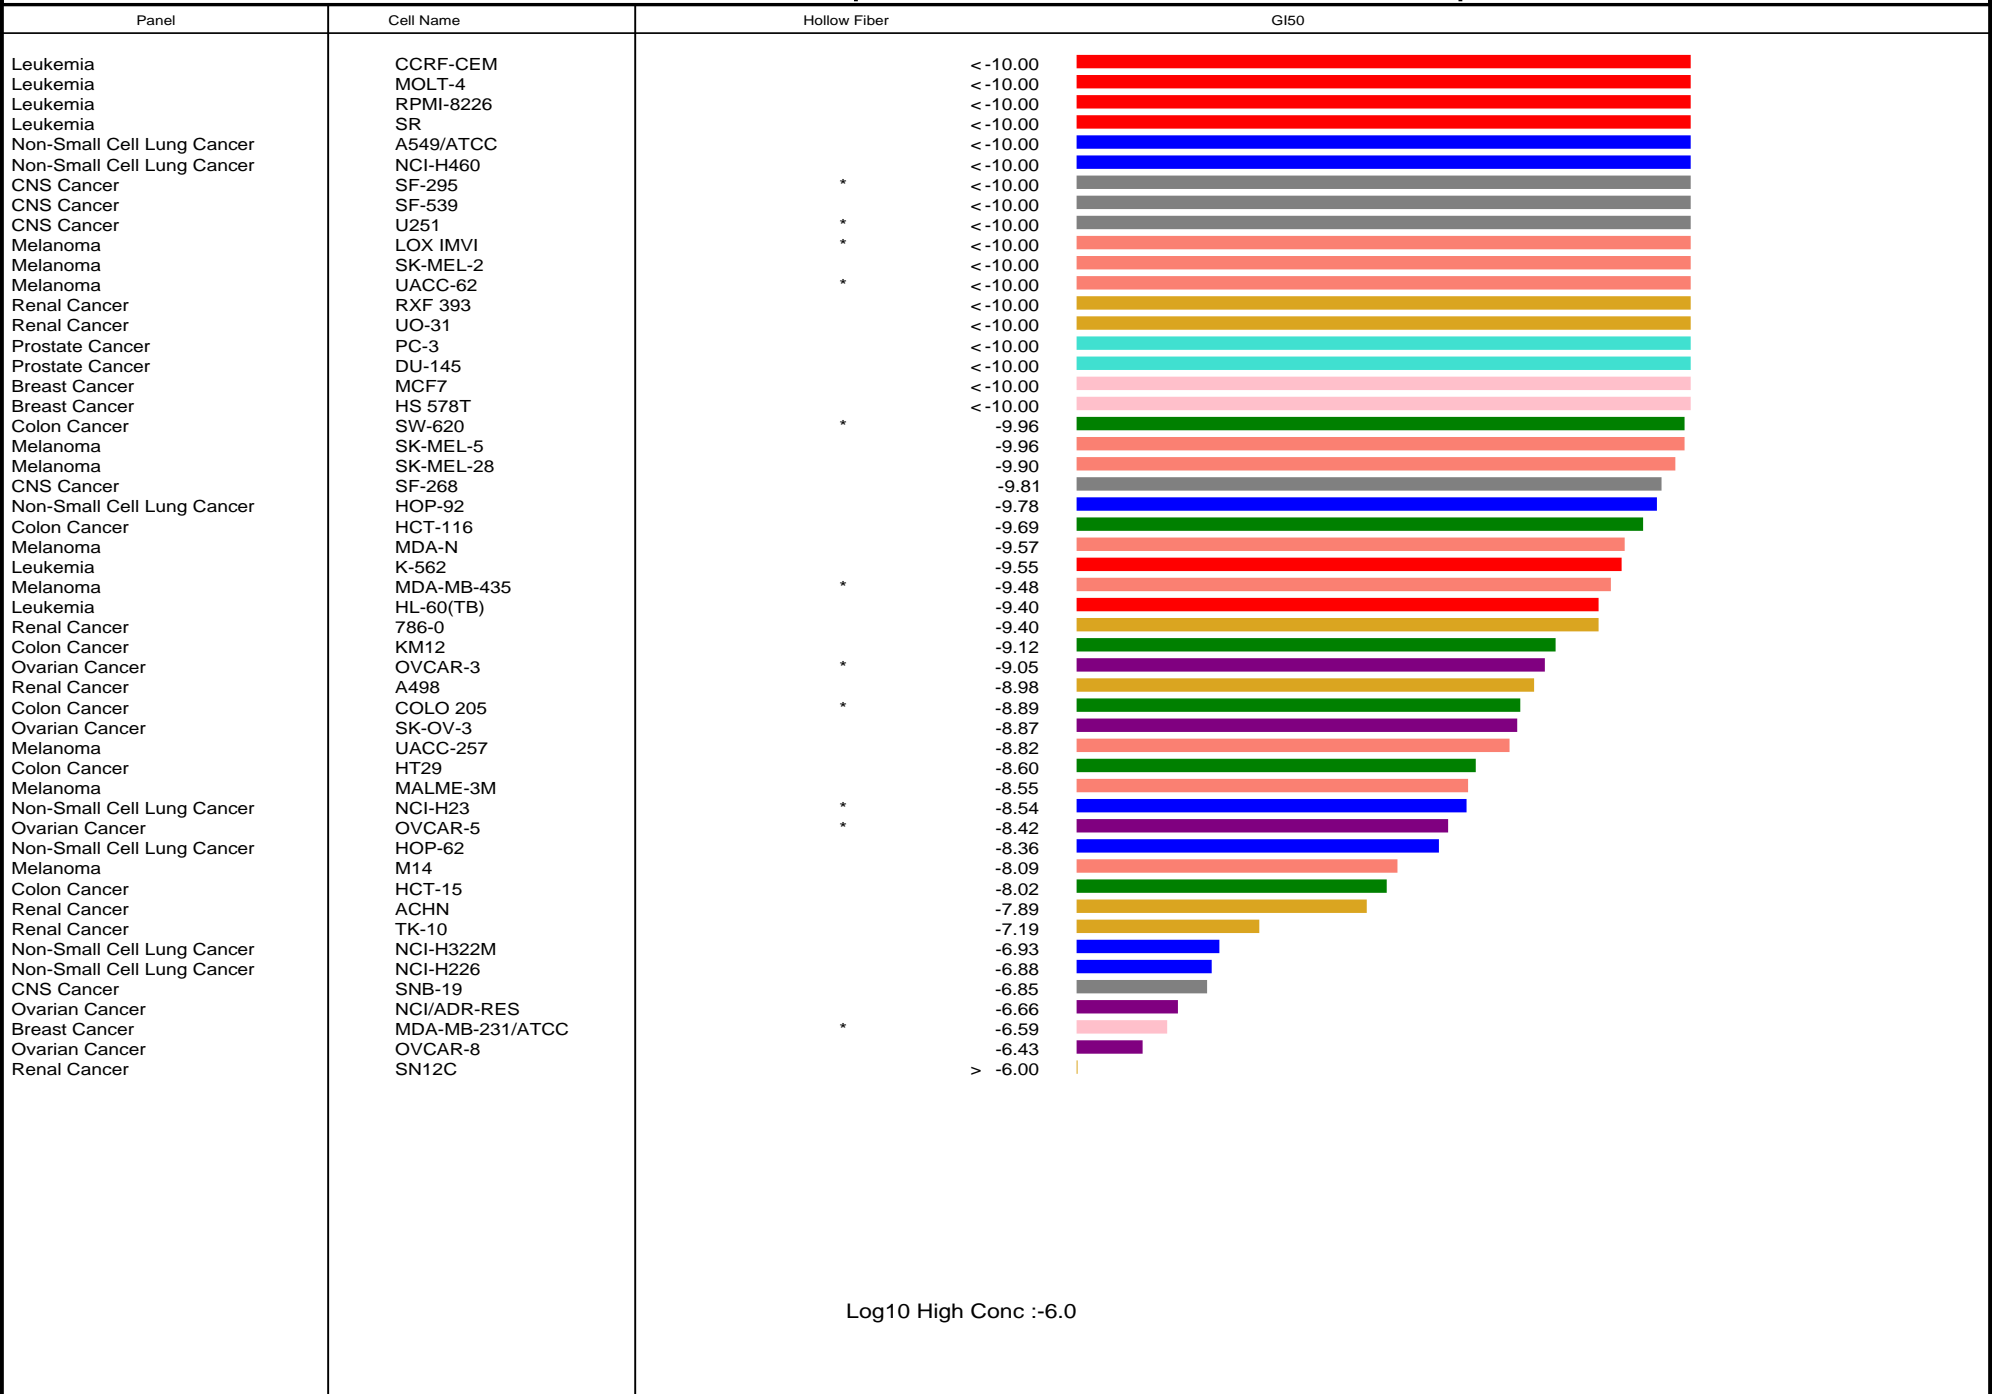

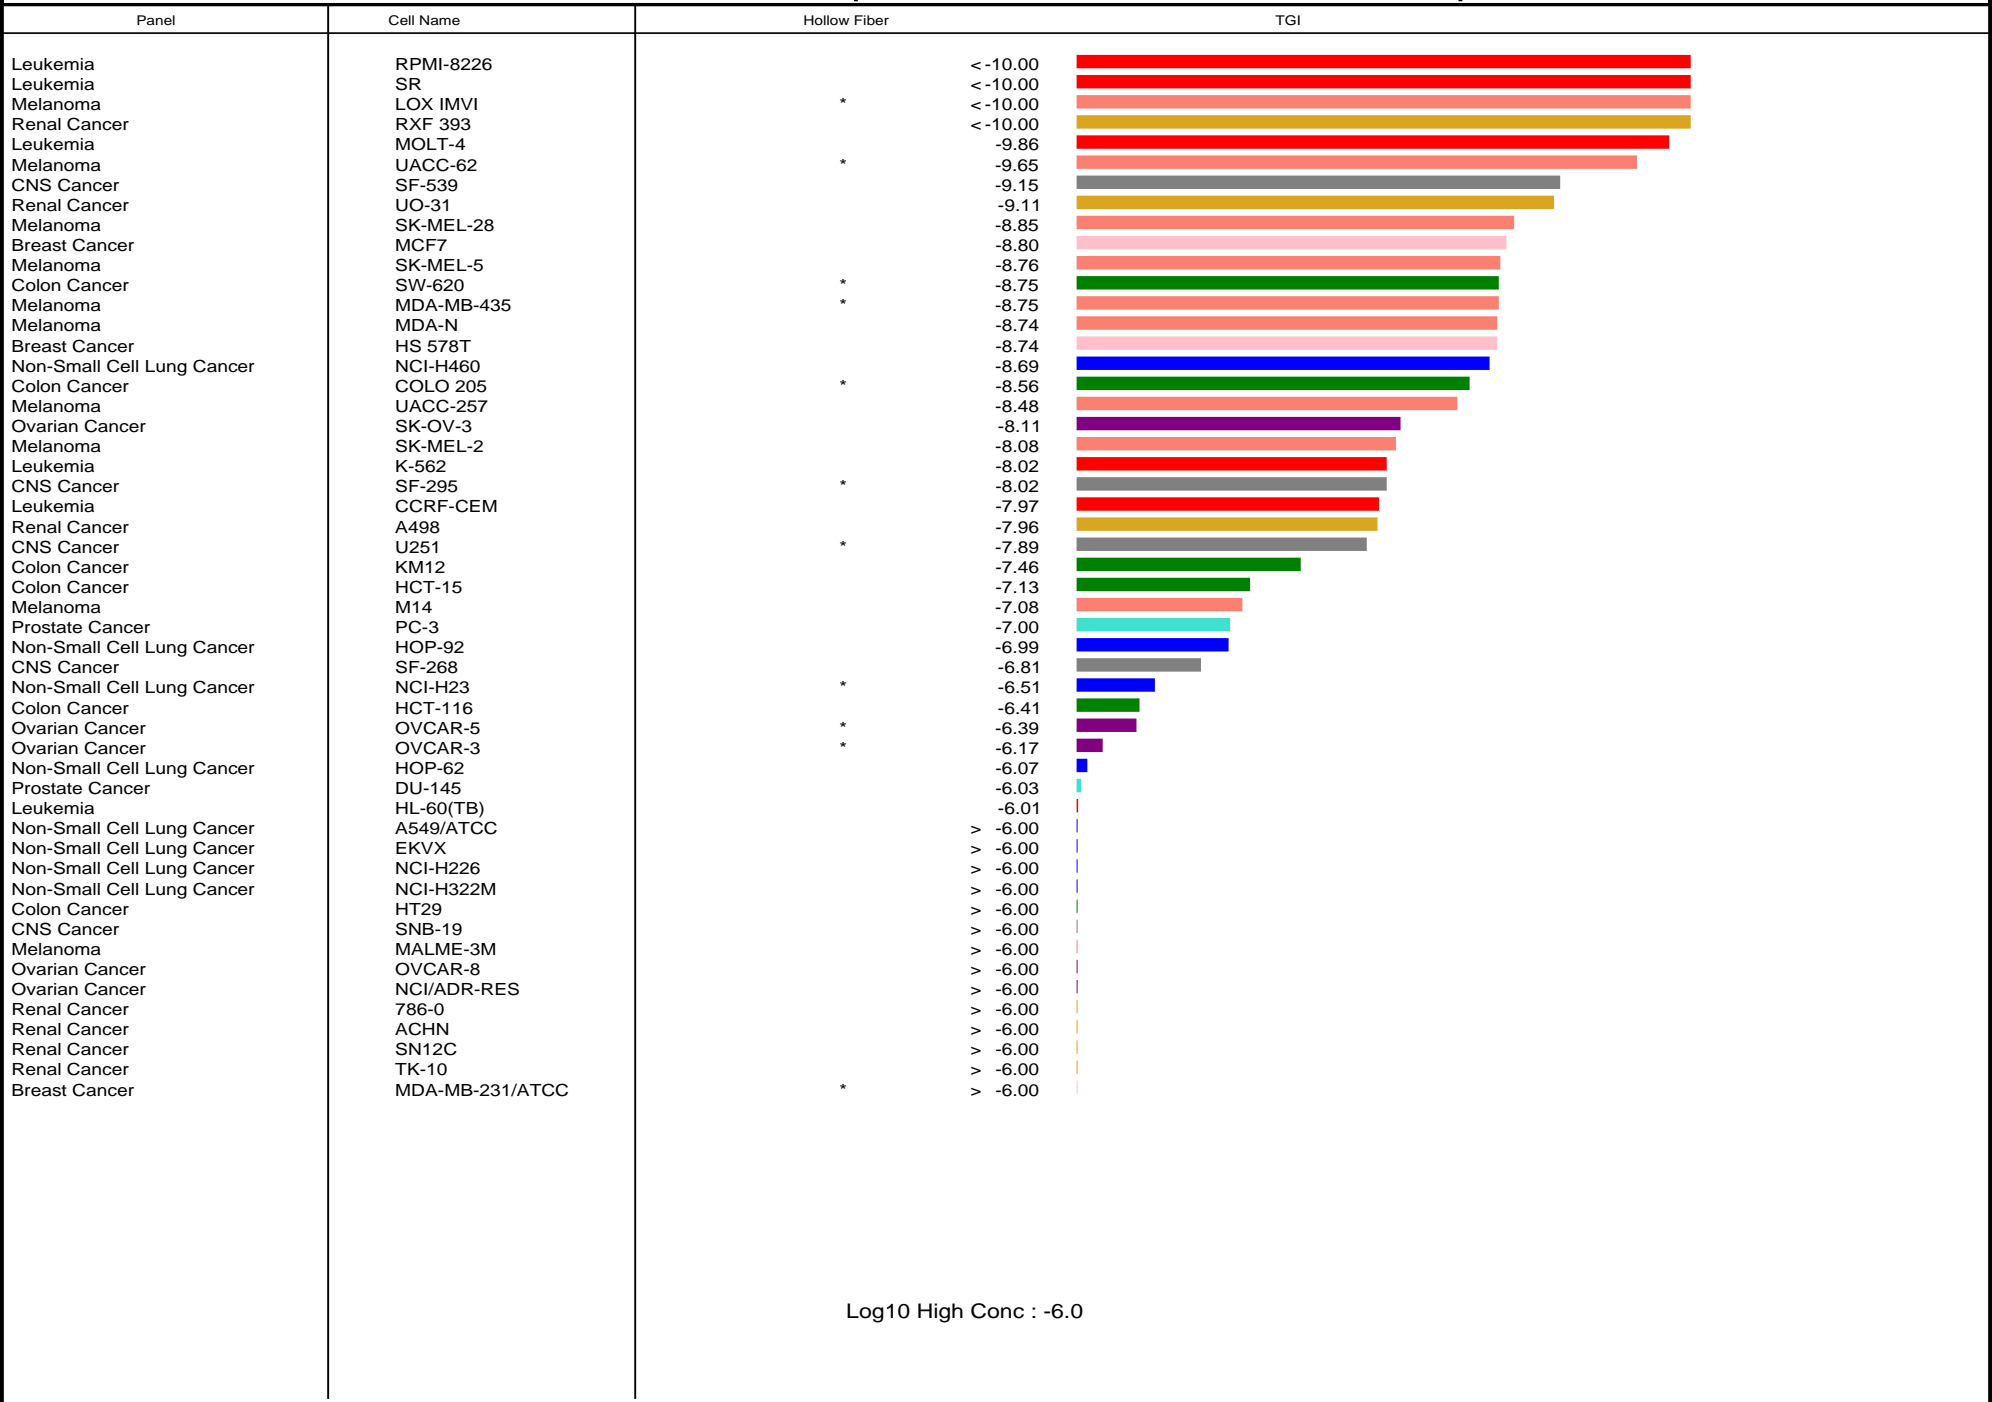

Log10 High Conc : -6.0

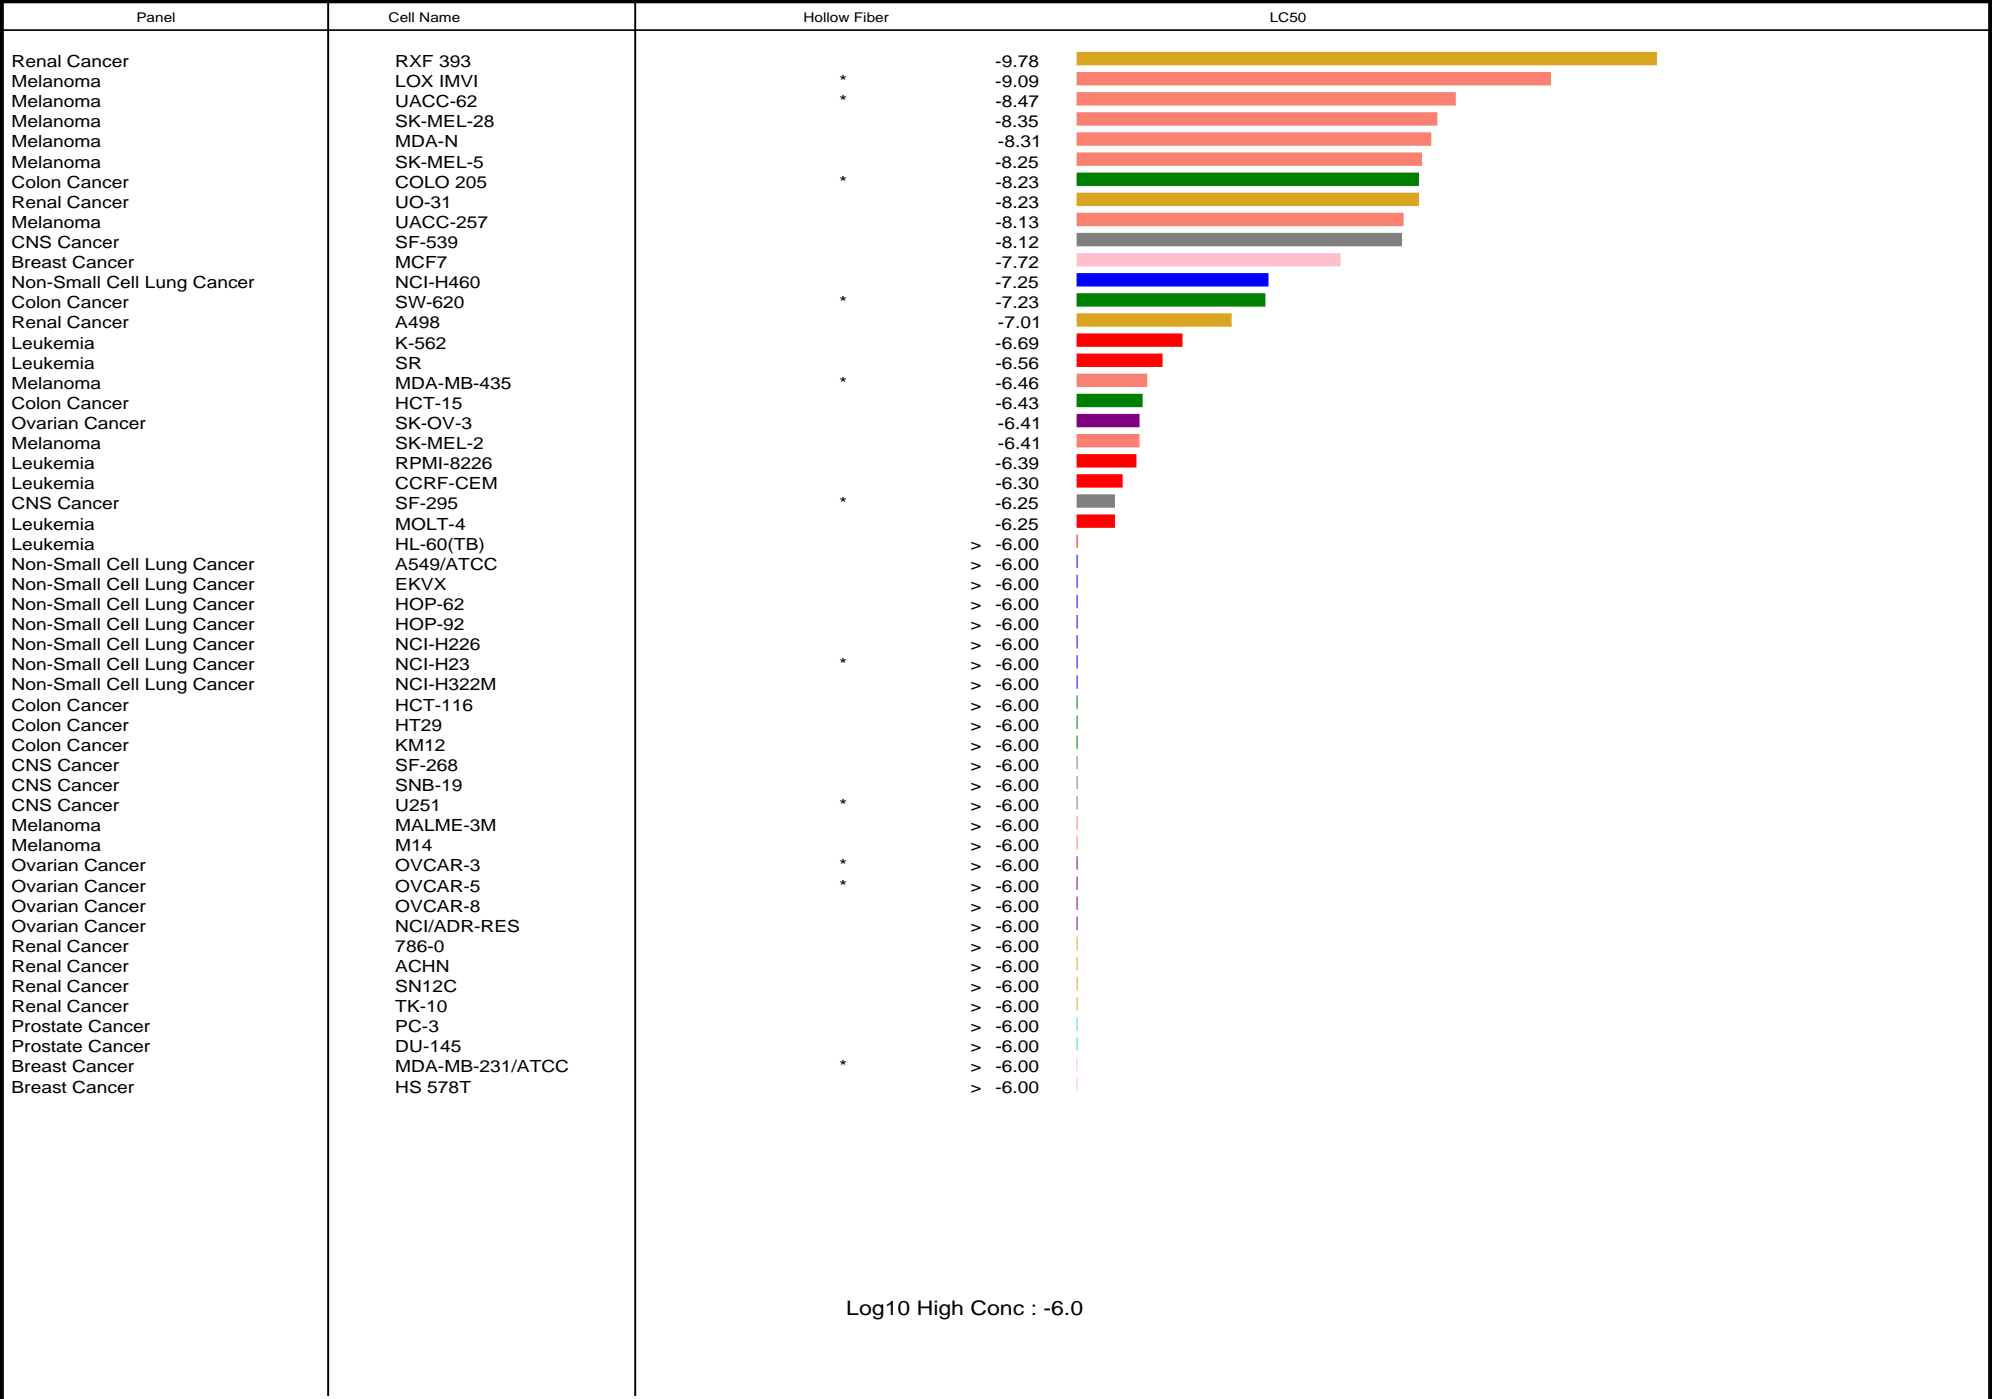

Log10 High Conc : -6.0



**National Cancer Institute Developmental Therapeutics Program  
In-Vitro Screening Data Review Checklist**

**NSC:** D - 720780 / 1

**Experiment ID:** 0104BS76

**Test Date:** April 09, 2001

**Review Date:**

Pending Action by the NCI for this experiment

1. \_\_\_\_\_ None
2. \_\_\_\_\_ Repeat testing in the Primary Screen
3. \_\_\_\_\_ Refer to Biological Evaluation Committee
4. \_\_\_\_\_ Currently under Review by Biological Evaluation Committee

# National Cancer Institute Developmental Therapeutics Program In-Vitro Testing Results

|                                  |                                       |                |               |
|----------------------------------|---------------------------------------|----------------|---------------|
| NSC : D - 720780 / 1             | Experiment ID : 0104BS76              | Test Type : 08 | Units : Molar |
| Report Date : September 01, 2011 | Test Date : April 09, 2001            | QNS :          | MC :          |
| COMI : 25EpiRitt (7334)          | Stain Reagent : SRB Dual-Pass Related | SSPL : 0GZS    |               |

| Panel/Cell Line                   | Log10 Concentration |                        |       |       |        |        |        |       |                |      |      |      |            |            |            |      |
|-----------------------------------|---------------------|------------------------|-------|-------|--------|--------|--------|-------|----------------|------|------|------|------------|------------|------------|------|
|                                   | Time                | Mean Optical Densities |       |       |        |        |        |       | Percent Growth |      |      |      |            | GI50       | TGI        | LC50 |
|                                   | Zero                | Ctrl                   | -10.0 | -9.0  | -8.0   | -7.0   | -6.0   | -10.0 | -9.0           | -8.0 | -7.0 | -6.0 |            |            |            |      |
| <b>Leukemia</b>                   |                     |                        |       |       |        |        |        |       |                |      |      |      |            |            |            |      |
| CCRF-CEM                          | 0.307               | 0.680                  | 0.210 | 0.135 | 0.128  | 0.115  | 0.089  | -32   | -56            | -58  | -63  | -71  | < 1.00E-10 | < 1.00E-10 | 5.65E-10   |      |
| HL-60(TB)                         | 0.885               | 1.901                  | 1.122 | 1.036 | 0.923  | 0.826  | 0.744  | 23    | 15             | 4    | -7   | -16  | < 1.00E-10 | 2.26E-8    | > 1.00E-6  |      |
| K-562                             | 0.221               | 1.036                  | 0.254 | 0.166 | 0.161  | 0.156  | 0.110  | 4     | -25            | -27  | -29  | -50  | < 1.00E-10 | 1.38E-10   | 9.52E-7    |      |
| MOLT-4                            | 0.166               | 0.533                  | 0.015 | 0.038 | 0.116  | 0.031  | 0.077  | -91   | -77            | -30  | -81  | -54  | < 1.00E-10 | < 1.00E-10 | .          |      |
| RPMI-8226                         | 0.472               | 1.155                  | 0.215 | 0.147 | 0.132  | 0.164  | 0.132  | -55   | -69            | -72  | -65  | -72  | < 1.00E-10 | < 1.00E-10 | < 1.00E-10 |      |
| SR                                | 0.216               | 0.697                  | 0.116 | 0.194 | 0.180  | 0.097  | 0.122  | -47   | -10            | -17  | -55  | -44  | < 1.00E-10 | < 1.00E-10 | .          |      |
| <b>Non-Small Cell Lung Cancer</b> |                     |                        |       |       |        |        |        |       |                |      |      |      |            |            |            |      |
| A549/ATCC                         | 0.259               | 0.825                  | 0.345 | 0.292 | 0.260  | 0.240  | 0.181  | 15    | 6              | .    | -7   | -30  | < 1.00E-10 | 1.03E-8    | > 1.00E-6  |      |
| EKVX                              | 0.435               | 0.565                  | 0.382 | 0.331 | 0.342  | 0.310  | 0.225  | -12   | -24            | -21  | -29  | -48  | < 1.00E-10 | < 1.00E-10 | > 1.00E-6  |      |
| HOP-62                            | 0.339               | 0.412                  | 0.134 | 0.125 | 0.157  | 0.149  | 0.135  | -60   | -63            | -54  | -56  | -60  | < 1.00E-10 | < 1.00E-10 | < 1.00E-10 |      |
| HOP-92                            | 0.577               | 1.001                  | 0.777 | 0.677 | 0.621  | 0.558  | 0.491  | 47    | 24             | 10   | -3   | -15  | < 1.00E-10 | 5.65E-8    | > 1.00E-6  |      |
| NCI-H226                          | 0.745               | 1.473                  | 1.109 | 0.971 | 1.014  | 0.983  | 0.796  | 50    | 31             | 37   | 33   | 7    | < 1.00E-10 | > 1.00E-6  | > 1.00E-6  |      |
| NCI-H23                           | 0.333               | 0.837                  | 0.623 | 0.482 | 0.387  | 0.337  | 0.217  | 57    | 30             | 11   | 1    | -35  | 1.85E-10   | 1.05E-7    | > 1.00E-6  |      |
| NCI-H322M                         | 0.383               | 0.971                  | 0.909 | 0.712 | 0.688  | 0.618  | 0.441  | 89    | 56             | 52   | 40   | 10   | 1.42E-8    | > 1.00E-6  | > 1.00E-6  |      |
| NCI-H460                          | 0.241               | 1.146                  | 0.247 | 0.167 | 0.125  | 0.084  | 0.055  | 1     | -31            | -48  | -65  | -77  | < 1.00E-10 | 1.05E-10   | 1.28E-8    |      |
| NCI-H522                          | 0.387               | 0.807                  | 0.496 | 0.382 | 0.152  | 0.073  | 0.026  | 26    | -1             | -61  | -81  | -93  | < 1.00E-10 | 8.87E-10   | 6.59E-9    |      |
| <b>Colon Cancer</b>               |                     |                        |       |       |        |        |        |       |                |      |      |      |            |            |            |      |
| COLO 205                          | 0.291               | 0.882                  | 0.525 | 0.226 | 0.027  | 0.040  | 0.047  | 40    | -23            | -91  | -86  | -84  | < 1.00E-10 | 4.34E-10   | 2.53E-9    |      |
| HCT-116                           | 0.157               | 0.518                  | 0.112 | 0.101 | 0.088  | 0.082  | .      | -29   | -36            | -44  | -48  | -100 | < 1.00E-10 | < 1.00E-10 | 1.09E-7    |      |
| HCT-15                            | 0.268               | 0.733                  | 0.634 | 0.492 | 0.270  | 0.094  | 0.018  | 79    | 48             | .    | -65  | -93  | 8.66E-10   | 1.02E-8    | 5.88E-8    |      |
| HT29                              | 0.284               | 1.099                  | 0.703 | 0.501 | 0.433  | 0.368  | 0.253  | 51    | 27             | 18   | 10   | -11  | 1.14E-10   | 3.06E-7    | > 1.00E-6  |      |
| KM12                              | 0.286               | 1.006                  | 0.456 | 0.215 | 0.162  | 0.150  | 0.110  | 24    | -25            | -44  | -48  | -62  | < 1.00E-10 | 3.07E-10   | 1.46E-7    |      |
| SW-620                            | 0.211               | 0.943                  | 0.301 | 0.193 | 0.122  | 0.091  | 0.013  | 12    | -9             | -42  | -57  | -94  | < 1.00E-10 | 3.83E-10   | 3.35E-8    |      |
| <b>CNS Cancer</b>                 |                     |                        |       |       |        |        |        |       |                |      |      |      |            |            |            |      |
| SF-268                            | 0.264               | 0.708                  | 0.429 | 0.345 | 0.327  | 0.253  | 0.141  | 37    | 18             | 14   | -4   | -47  | < 1.00E-10 | 5.80E-8    | > 1.00E-6  |      |
| SF-295                            | 0.357               | 0.600                  | 0.126 | 0.081 | 0.064  | 0.068  | 0.070  | -65   | -77            | -82  | -81  | -80  | < 1.00E-10 | < 1.00E-10 | < 1.00E-10 |      |
| SF-539                            | 0.293               | 0.893                  | 0.282 | 0.202 | 0.111  | 0.107  | 0.049  | -4    | -31            | -62  | -64  | -83  | < 1.00E-10 | < 1.00E-10 | 4.02E-9    |      |
| SNB-19                            | 0.296               | 1.119                  | 0.728 | 0.646 | 0.630  | 0.640  | 0.303  | 52    | 43             | 41   | 42   | 1    | 1.78E-10   | > 1.00E-6  | > 1.00E-6  |      |
| U251                              | 0.174               | 0.577                  | 0.199 | 0.194 | 0.126  | 0.098  | 0.072  | 6     | 5              | -28  | -44  | -59  | < 1.00E-10 | 1.41E-9    | 2.60E-7    |      |
| <b>Melanoma</b>                   |                     |                        |       |       |        |        |        |       |                |      |      |      |            |            |            |      |
| LOX IMVI                          | 0.344               | 1.084                  | 0.246 | 0.191 | 0.092  | 0.079  | 0.014  | -29   | -45            | -73  | -77  | -96  | < 1.00E-10 | < 1.00E-10 | 1.54E-9    |      |
| MALME-3M                          | 0.407               | 0.754                  | 0.568 | 0.502 | 0.450  | 0.407  | 0.231  | 46    | 27             | 12   | .    | -43  | < 1.00E-10 | 9.77E-8    | > 1.00E-6  |      |
| M14                               | 0.443               | 0.793                  | 0.620 | 0.454 | 0.316  | 0.249  | 0.087  | 51    | 3              | -29  | -44  | -80  | 1.02E-10   | 1.25E-9    | 1.48E-7    |      |
| MDA-MB-435                        | 0.381               | 0.990                  | 0.535 | 0.306 | 0.108  | 0.224  | 0.034  | 25    | -20            | -72  | -41  | -91  | < 1.00E-10 | 3.64E-10   | .          |      |
| MDA-N                             | 0.418               | 1.404                  | 0.720 | 0.331 | 0.076  | 0.113  | 0.051  | 31    | -21            | -82  | -73  | -88  | < 1.00E-10 | 3.94E-10   | 3.01E-9    |      |
| SK-MEL-2                          | 0.323               | 0.609                  | 0.299 | 0.253 | 0.234  | 0.219  | 0.094  | -8    | -22            | -28  | -32  | -71  | < 1.00E-10 | < 1.00E-10 | 2.87E-7    |      |
| SK-MEL-5                          | 0.425               | 1.323                  | 0.591 | 0.159 | -0.018 | -0.018 | -0.037 | 18    | -63            | -100 | -100 | -100 | < 1.00E-10 | 1.69E-10   | 6.97E-10   |      |
| UACC-257                          | 0.663               | 1.405                  | 1.155 | 0.751 | 0.143  | 0.191  | 0.086  | 66    | 12             | -79  | -71  | -87  | 1.99E-10   | 1.35E-9    | 4.83E-9    |      |
| UACC-62                           | 0.611               | 1.627                  | 0.382 | 0.221 | 0.164  | 0.146  | 0.068  | -37   | -64            | -73  | -76  | -89  | < 1.00E-10 | < 1.00E-10 | 2.98E-10   |      |
| <b>Ovarian Cancer</b>             |                     |                        |       |       |        |        |        |       |                |      |      |      |            |            |            |      |
| OVCAR-3                           | 0.379               | 0.841                  | 0.589 | 0.579 | 0.561  | 0.512  | 0.386  | 45    | 43             | 39   | 29   | 2    | < 1.00E-10 | > 1.00E-6  | > 1.00E-6  |      |
| OVCAR-5                           | 0.326               | 0.529                  | 0.322 | 0.253 | 0.264  | 0.235  | 0.158  | -1    | -22            | -19  | -28  | -52  | < 1.00E-10 | < 1.00E-10 | 8.61E-7    |      |
| OVCAR-8                           | 0.539               | 1.282                  | 0.762 | 0.730 | 0.647  | 0.682  | 0.562  | 30    | 26             | 15   | 19   | 3    | < 1.00E-10 | > 1.00E-6  | > 1.00E-6  |      |
| NCI/ADR-RES                       | 0.437               | 0.960                  | 0.848 | 0.797 | 0.607  | 0.465  | 0.441  | 78    | 69             | 33   | 5    | 1    | 3.30E-9    | > 1.00E-6  | > 1.00E-6  |      |
| SK-OV-3                           | 0.588               | 0.910                  | 0.660 | 0.526 | 0.372  | 0.364  | 0.226  | 22    | -11            | -37  | -38  | -62  | < 1.00E-10 | 4.74E-10   | 3.20E-7    |      |
| <b>Renal Cancer</b>               |                     |                        |       |       |        |        |        |       |                |      |      |      |            |            |            |      |
| 786-0                             | 0.247               | 0.530                  | 0.223 | 0.211 | 0.141  | 0.118  | 0.061  | -10   | -15            | -43  | -52  | -75  | < 1.00E-10 | < 1.00E-10 | 5.55E-8    |      |
| A498                              | 1.043               | 1.659                  | 1.289 | 1.079 | 0.773  | 0.419  | 0.168  | 40    | 6              | -26  | -60  | -84  | < 1.00E-10 | 1.53E-9    | 5.13E-8    |      |
| ACHN                              | 0.329               | 0.778                  | 0.435 | 0.414 | 0.349  | 0.367  | 0.277  | 24    | 19             | 4    | 8    | -16  | < 1.00E-10 | 2.22E-9    | > 1.00E-6  |      |
| CAKI-1                            | 0.451               | 1.342                  | 0.954 | 0.795 | 0.428  | 0.299  | 0.240  | 56    | 39             | -5   | -34  | -47  | 2.29E-10   | 7.60E-9    | > 1.00E-6  |      |
| RXF 393                           | 0.461               | 0.876                  | 0.382 | 0.336 | 0.338  | 0.323  | 0.189  | -17   | -27            | -27  | -30  | -59  | < 1.00E-10 | < 1.00E-10 | 4.87E-7    |      |
| SN12C                             | 0.515               | 1.212                  | 0.949 | 0.964 | 0.848  | 0.866  | 0.744  | 62    | 64             | 48   | 50   | 33   | .          | > 1.00E-6  | > 1.00E-6  |      |
| TK-10                             | 0.455               | 1.172                  | 1.067 | 0.926 | 0.826  | 0.670  | 0.503  | 85    | 66             | 52   | 30   | 7    | 1.19E-8    | > 1.00E-6  | > 1.00E-6  |      |
| UO-31                             | 0.241               | 0.717                  | 0.268 | 0.172 | 0.095  | 0.058  | 0.020  | 6     | -29            | -61  | -76  | -92  | < 1.00E-10 | 1.46E-10   | 4.62E-9    |      |
| <b>Prostate Cancer</b>            |                     |                        |       |       |        |        |        |       |                |      |      |      |            |            |            |      |
| PC-3                              | 0.341               | 1.044                  | 0.465 | 0.391 | 0.294  | 0.295  | 0.208  | 18    | 7              | -14  | -14  | -39  | < 1.00E-10 | 2.17E-9    | > 1.00E-6  |      |
| DU-145                            | 0.351               | 1.024                  | 0.651 | 0.677 | 0.582  | 0.534  | 0.402  | 45    | 48             | 34   | 27   | 8    | < 1.00E-10 | > 1.00E-6  | > 1.00E-6  |      |
| <b>Breast Cancer</b>              |                     |                        |       |       |        |        |        |       |                |      |      |      |            |            |            |      |
| MCF7                              | 0.465               | 1.417                  | 0.668 | 0.461 | 0.420  | 0.377  | 0.168  | 21    | -1             | -10  | -19  | -64  | < 1.00E-10 | 9.14E-10   | 4.89E-7    |      |
| MDA-MB-231/ATCC                   | 0.469               | 0.942                  | 0.634 | 0.591 | 0.536  | 0.498  | 0.277  | 35    | 26             | 14   | 6    | -41  | < 1.00E-10 | 1.34E-7    | > 1.00E-6  |      |
| HS 578T                           | 0.536               | 0.958                  | 0.402 | 0.312 | 0.262  | 0.254  | 0.191  | -25   | -42            | -51  | -53  | -64  | < 1.00E-10 | < 1.00E-10 | 7.59E-9    |      |

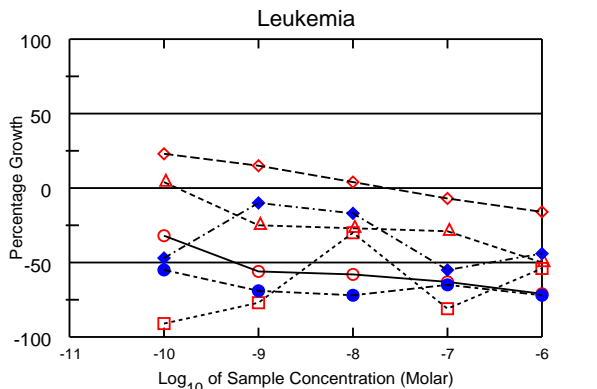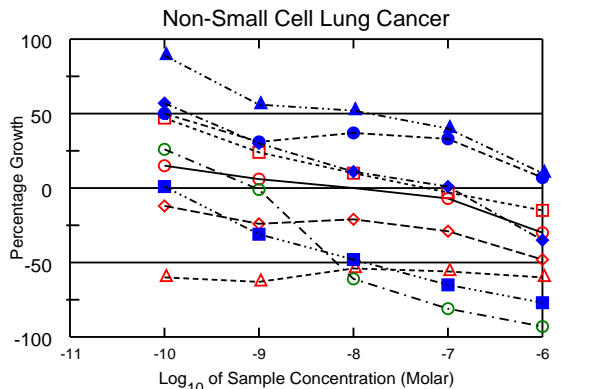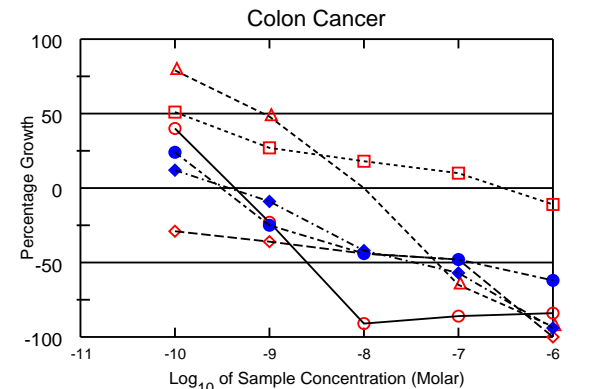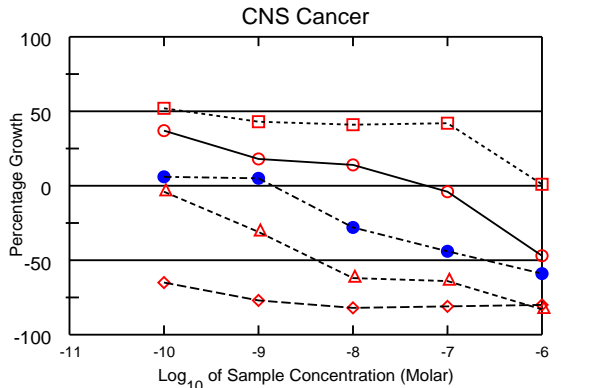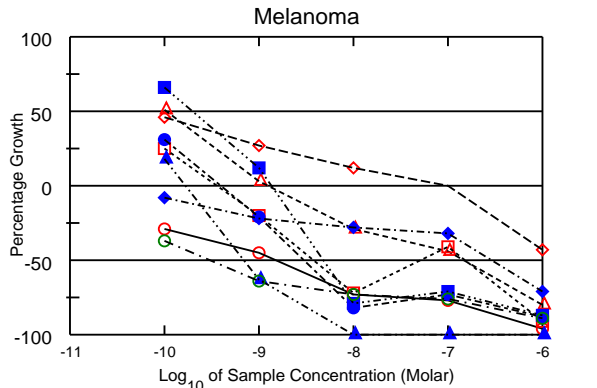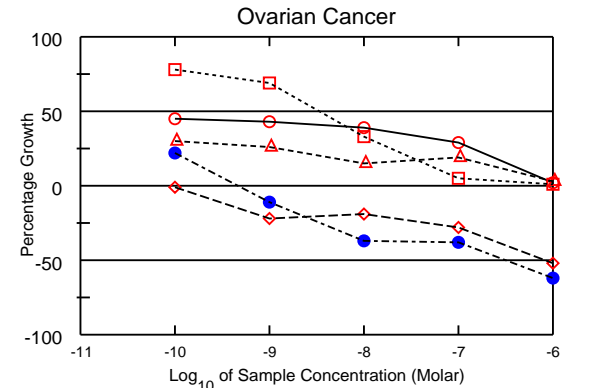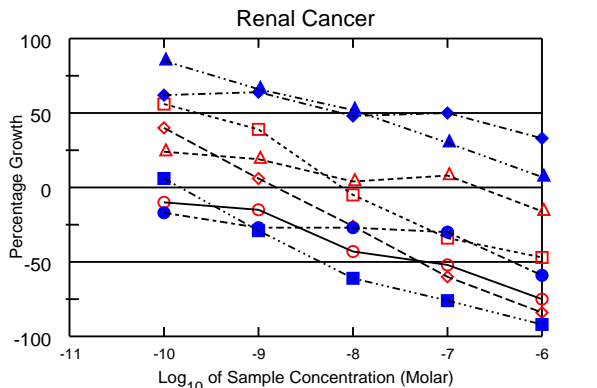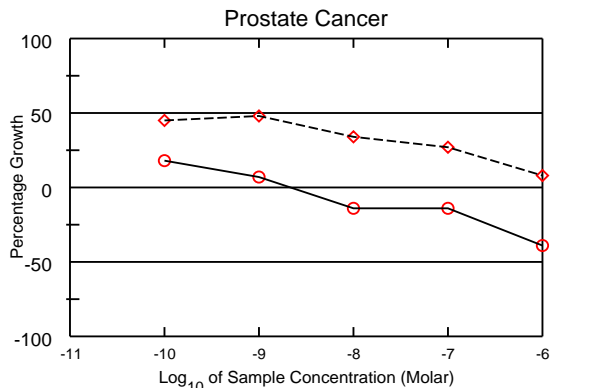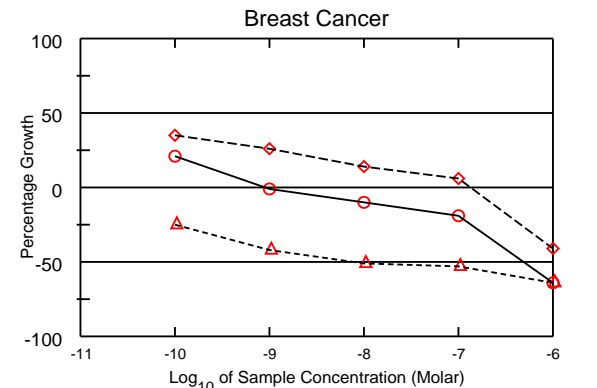

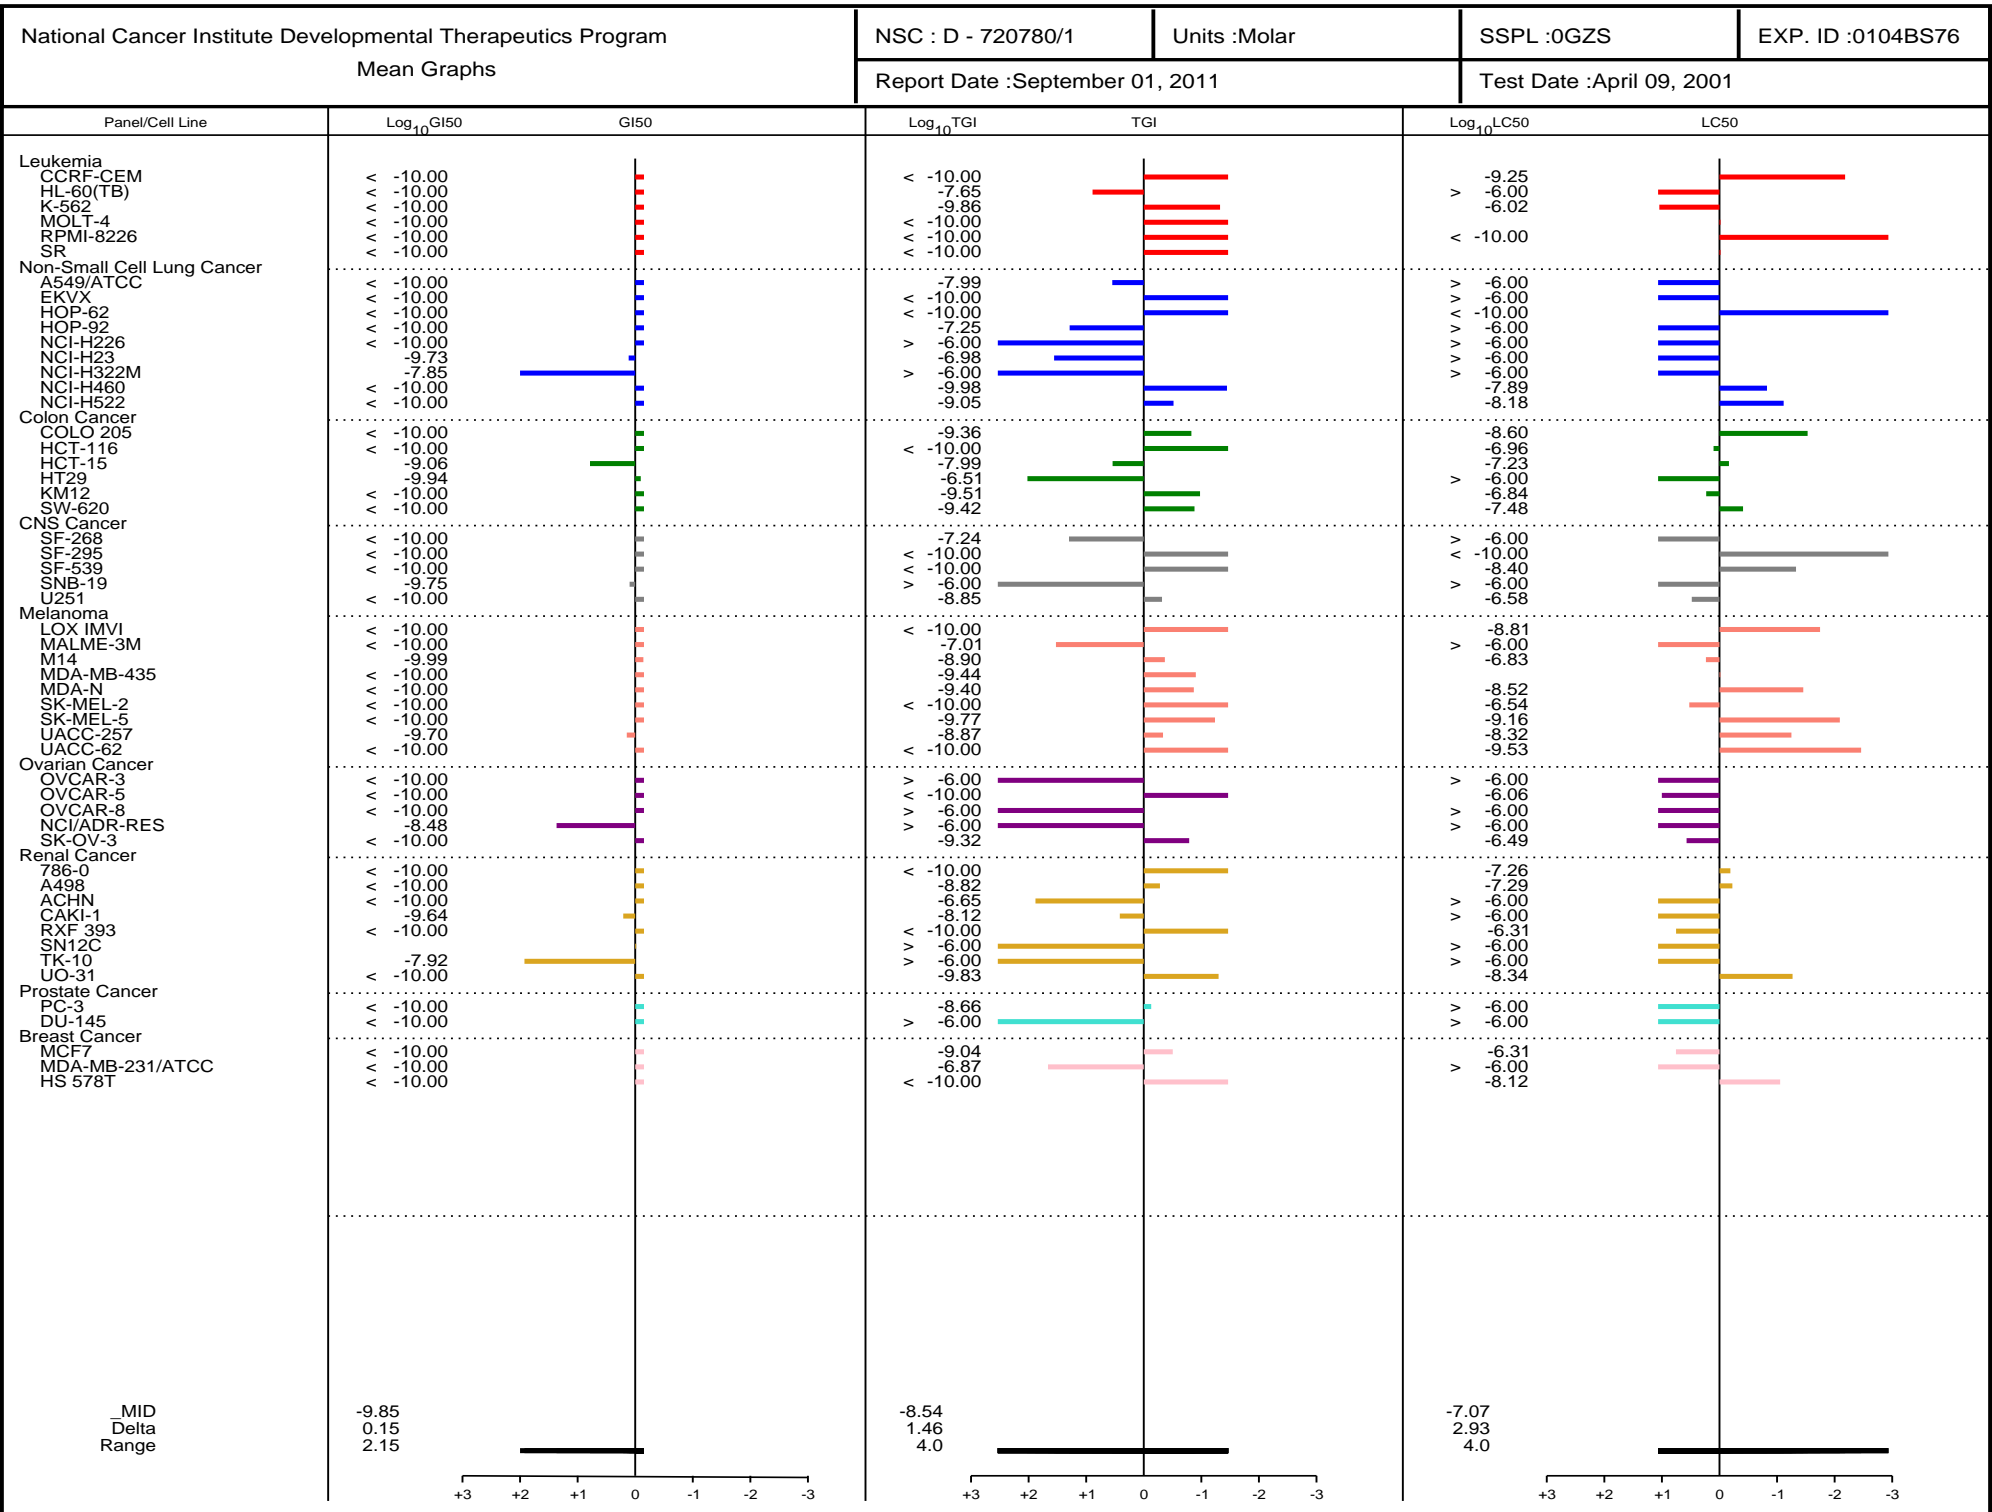

All Cell Lines

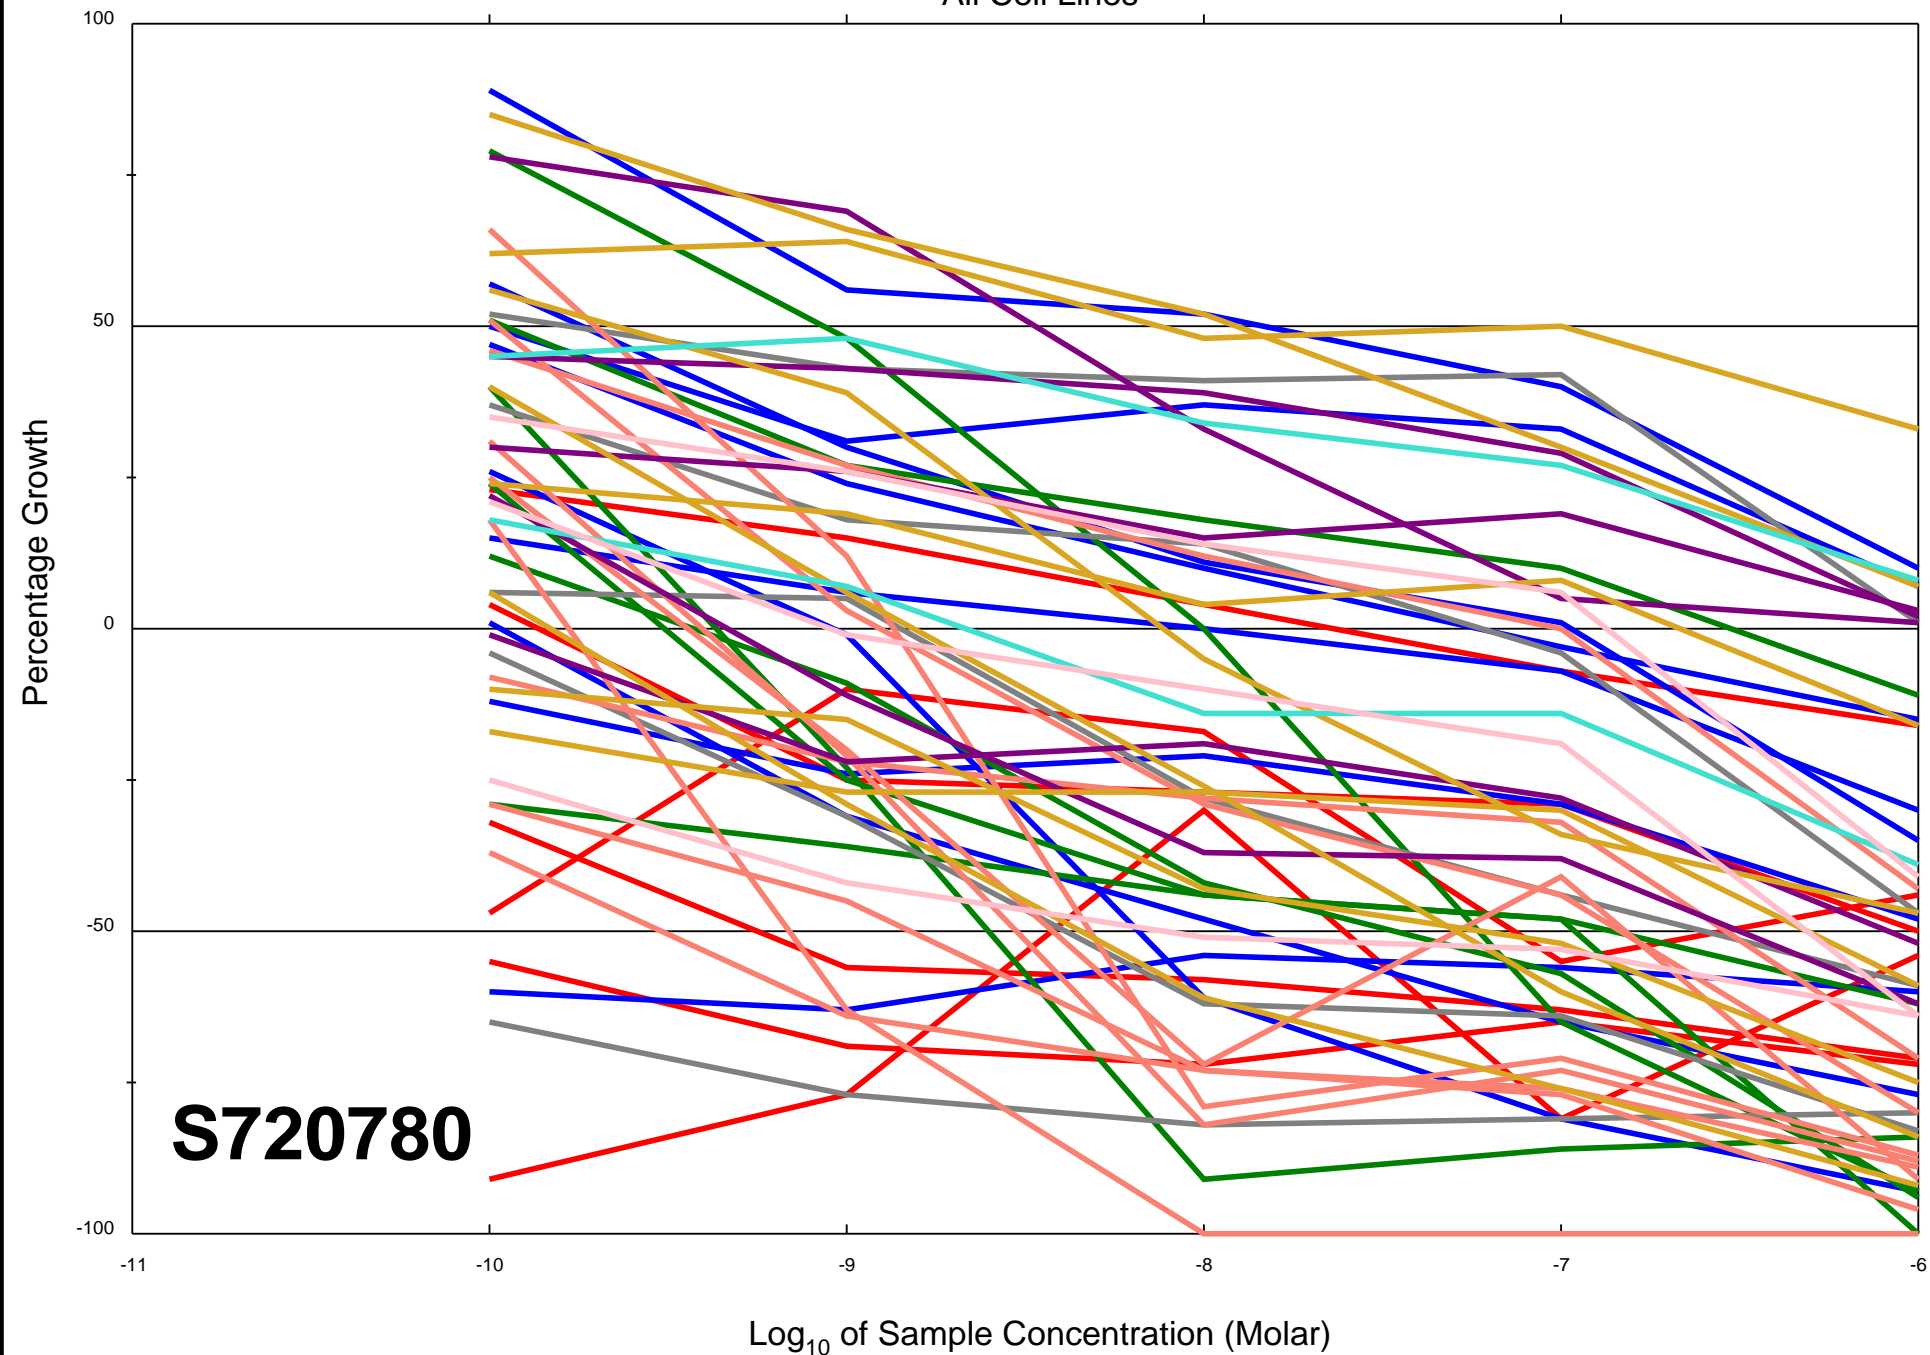

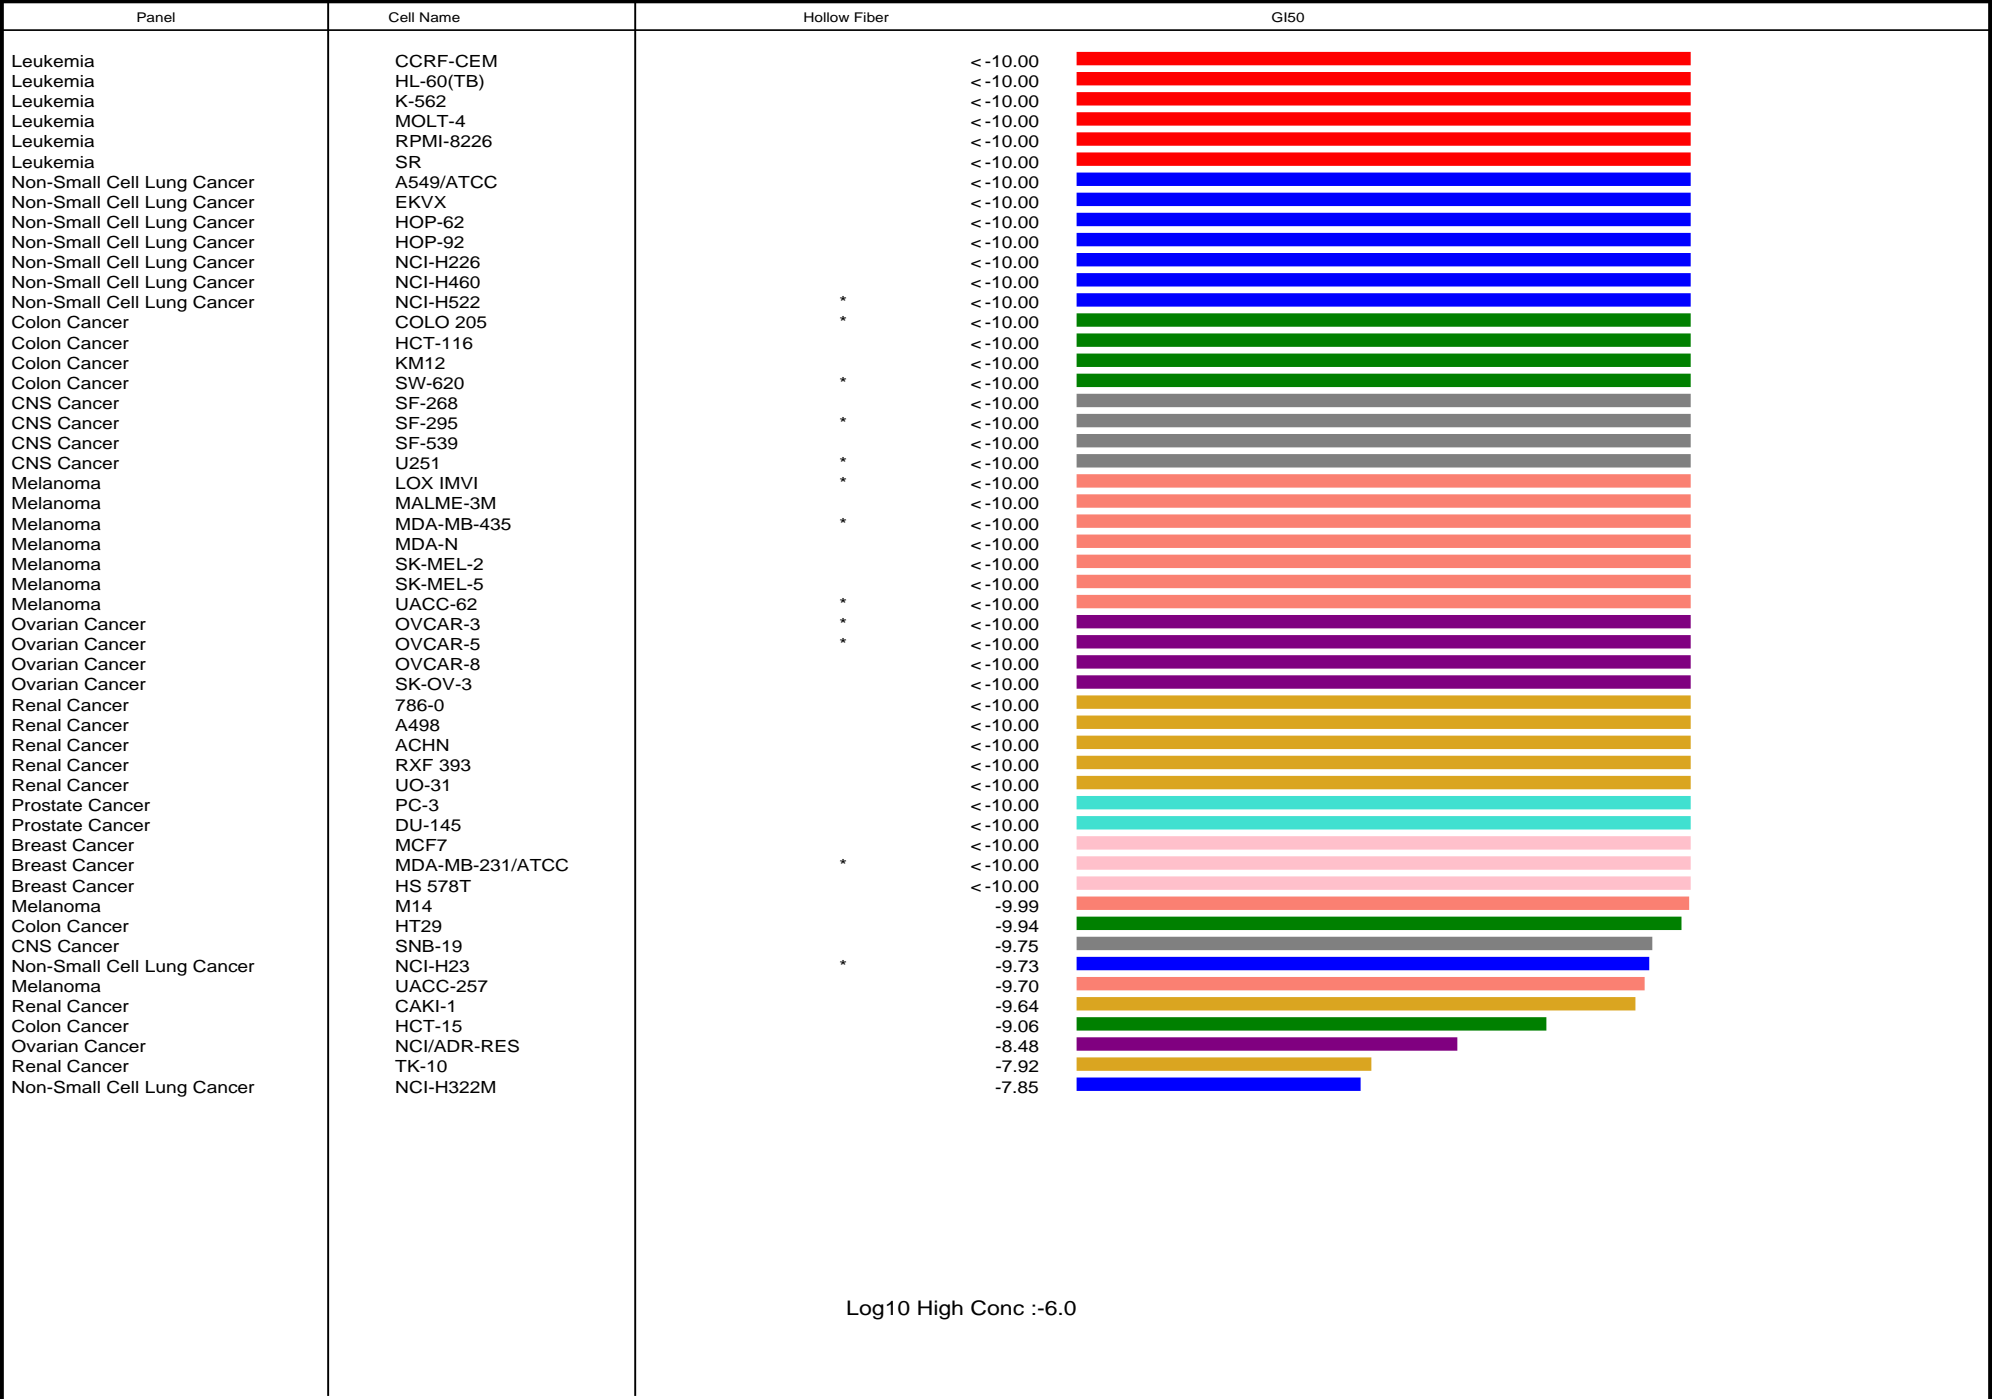

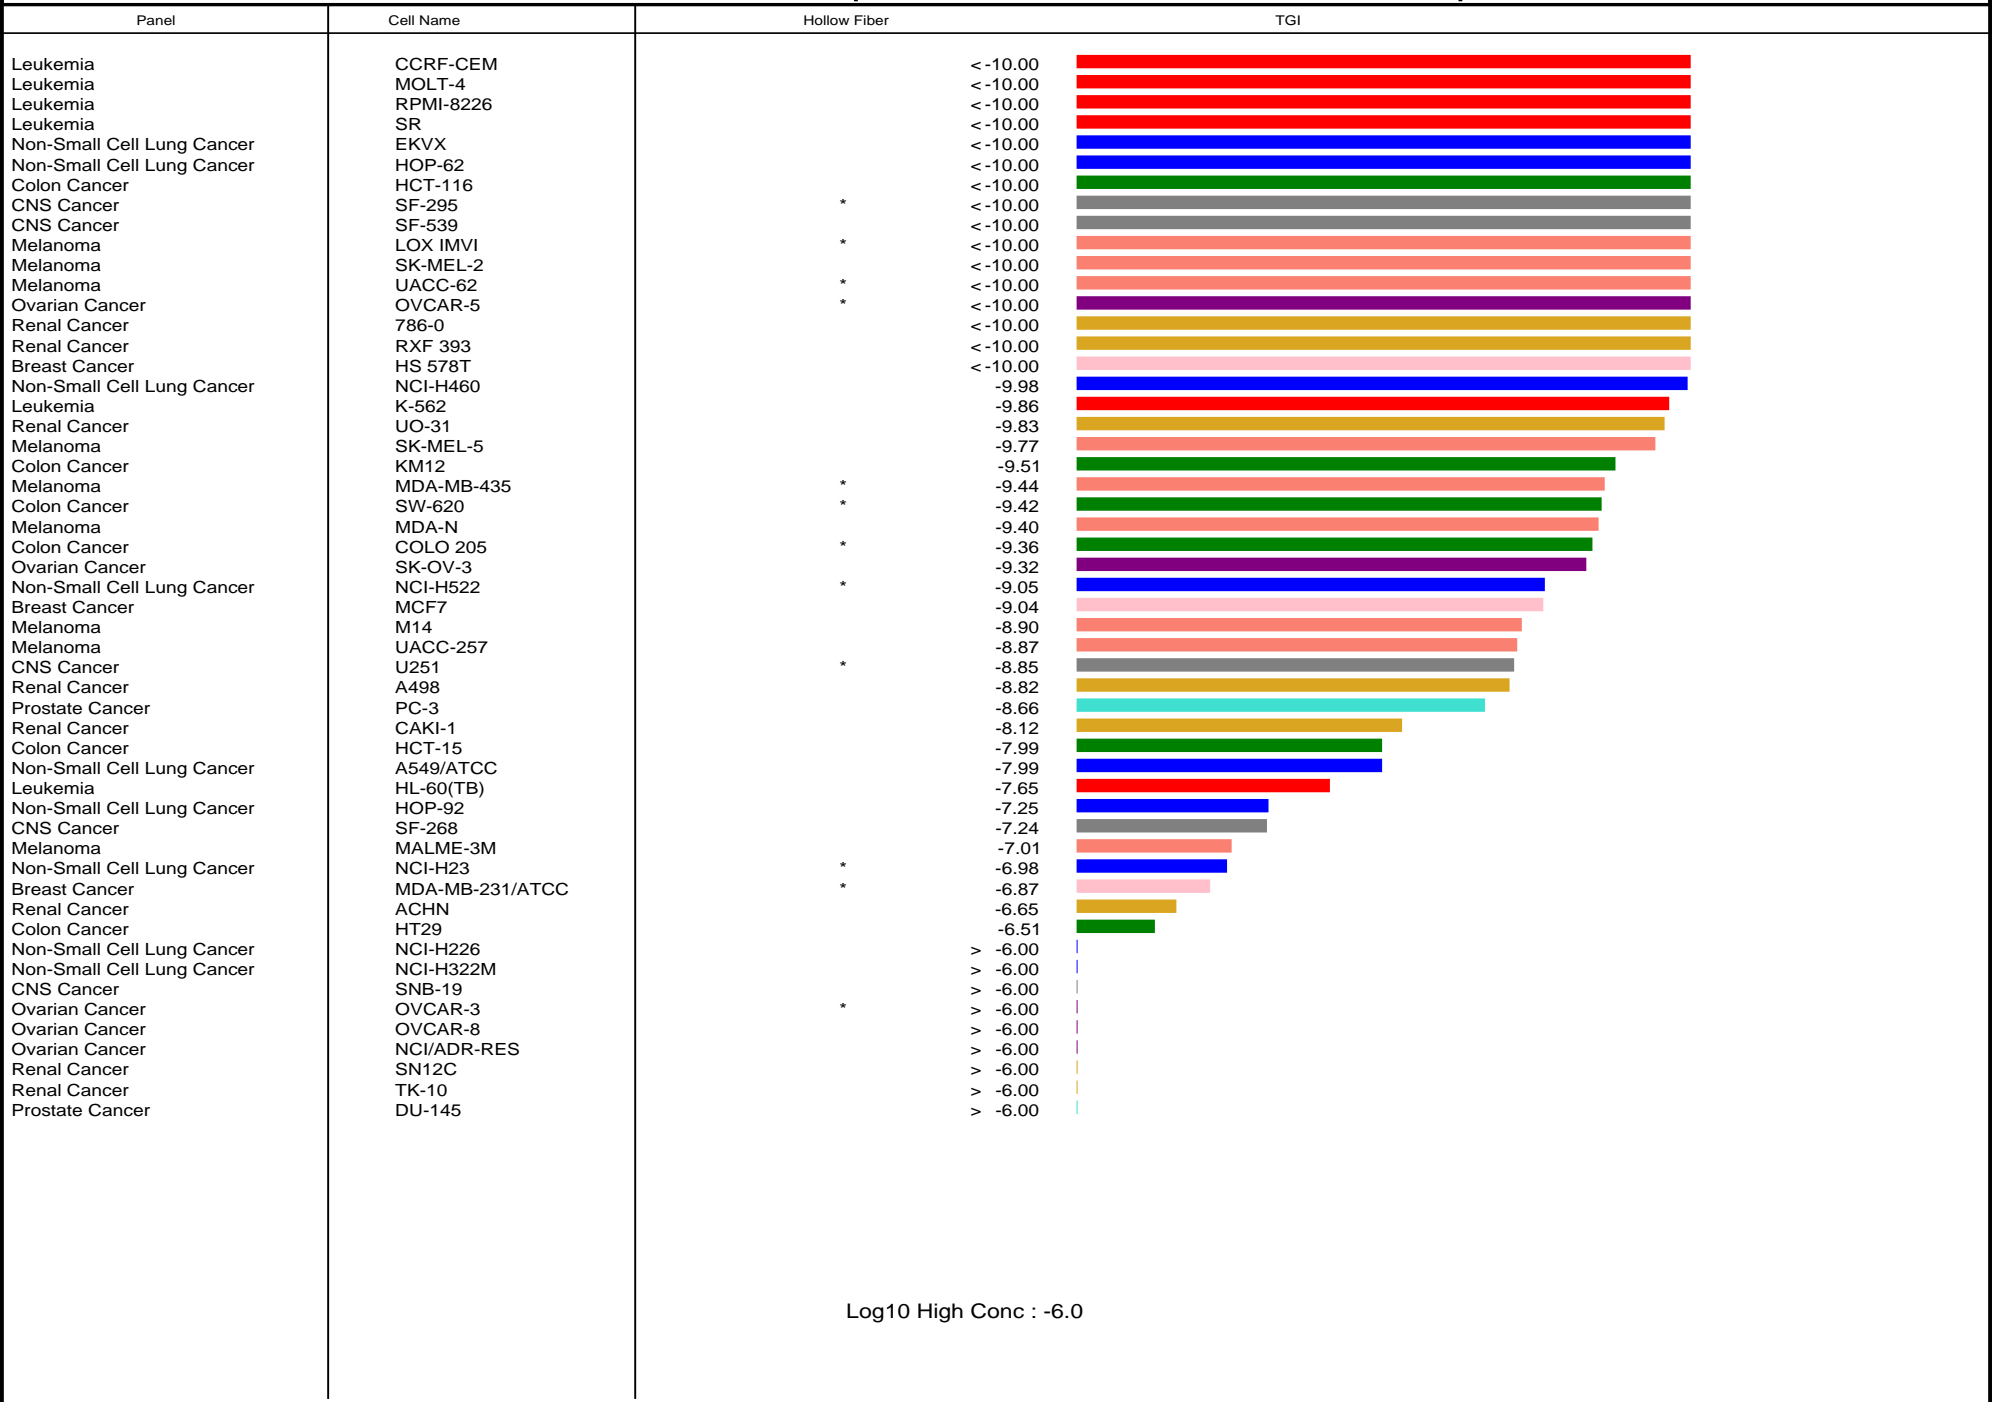

Log10 High Conc : -6.0

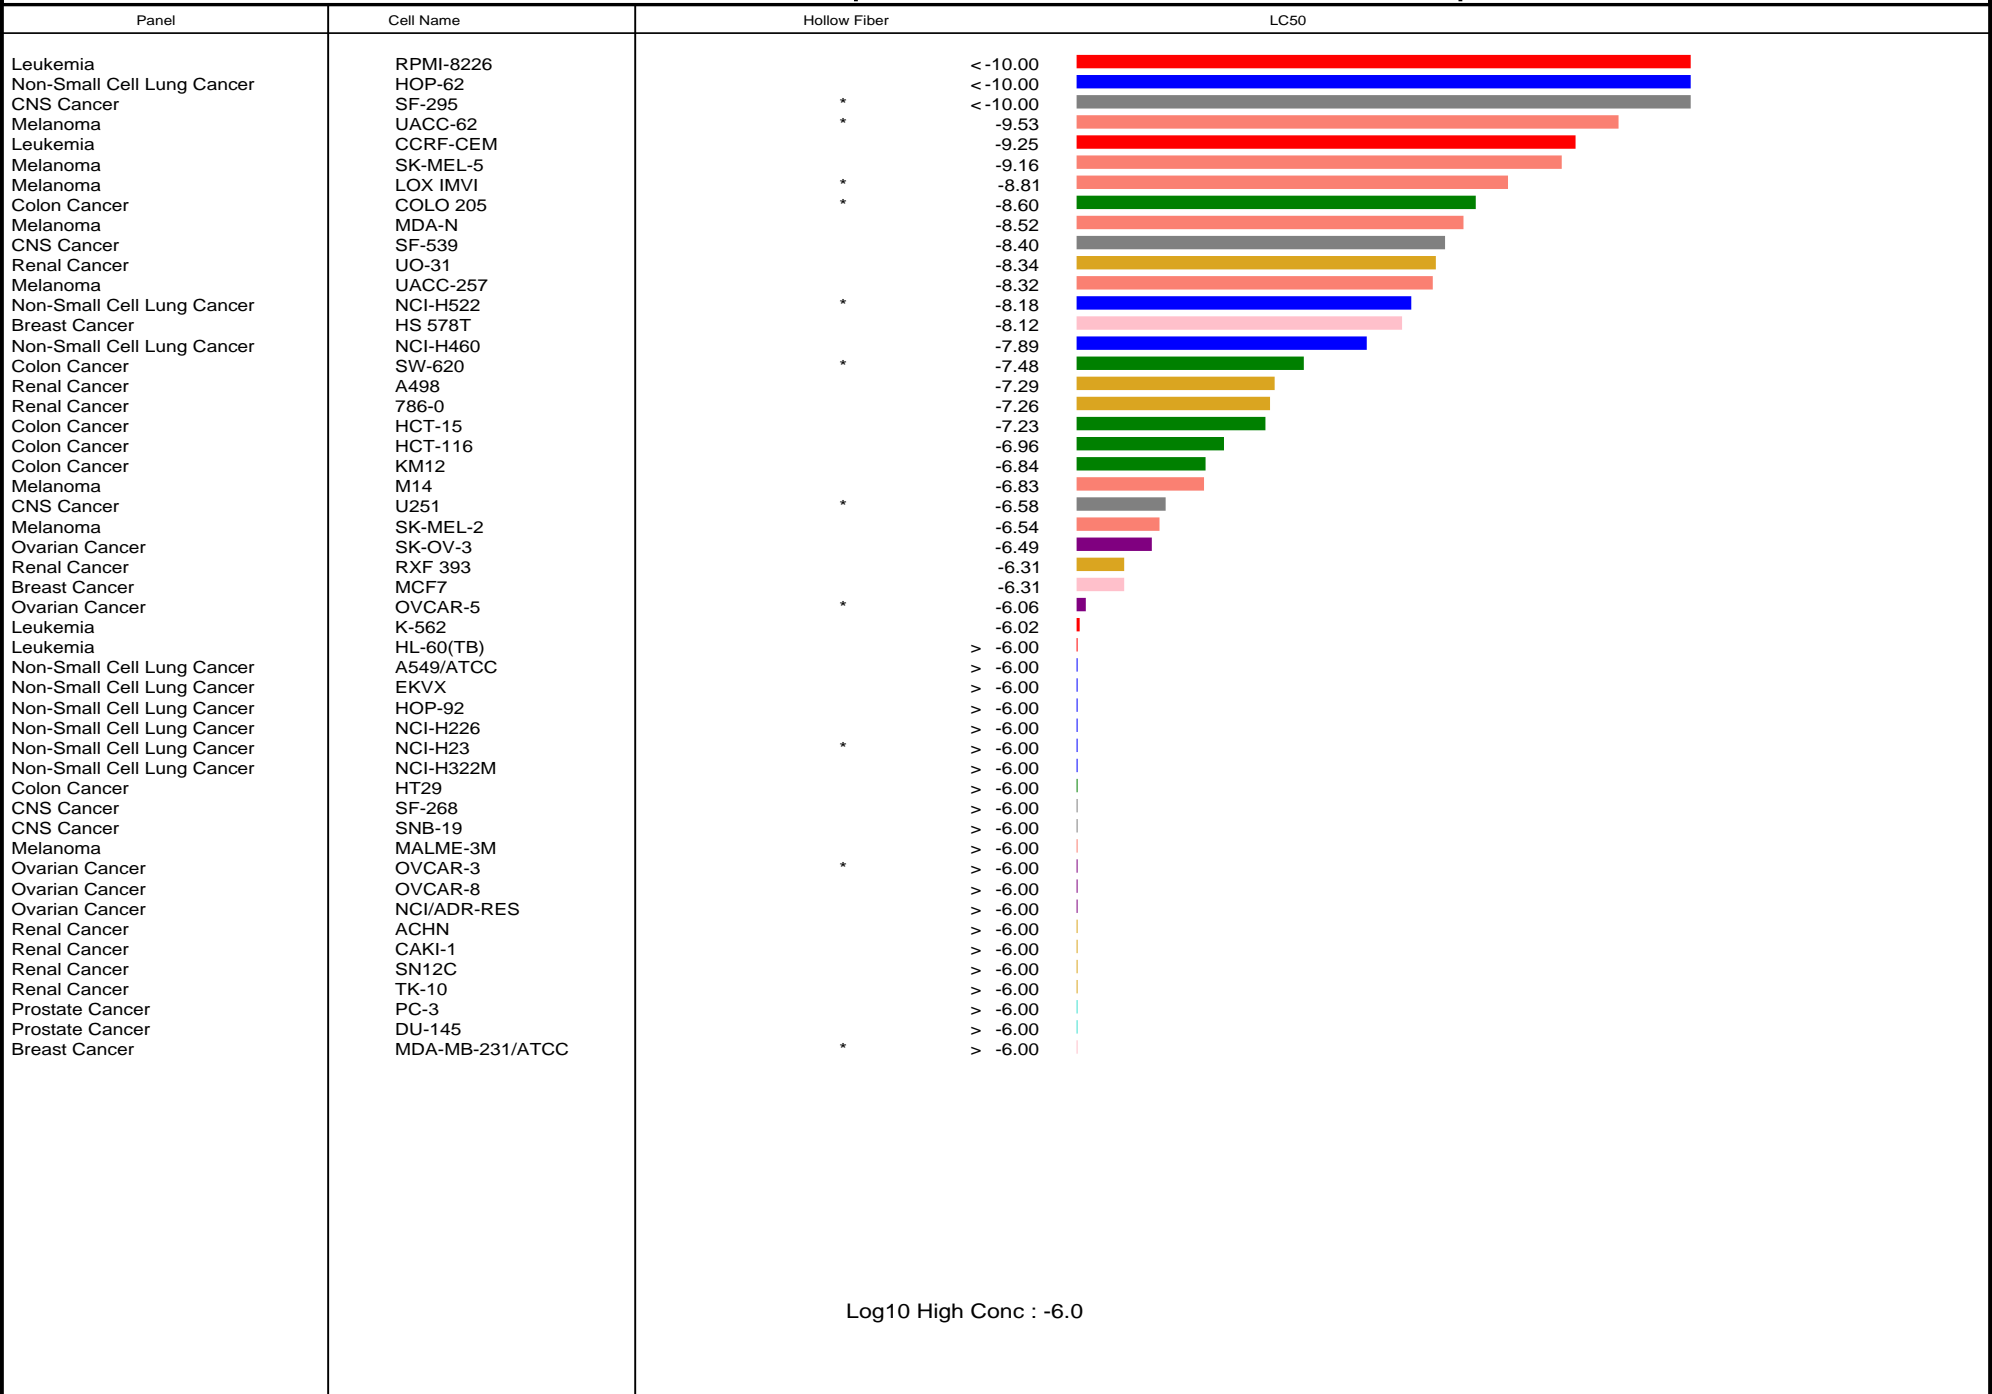

Log10 High Conc : -6.0



**National Cancer Institute Developmental Therapeutics Program  
In-Vitro Screening Data Review Checklist**

**NSC:** D - 720780 / 1

**Experiment ID:** 0104BS79

**Test Date:** April 16, 2001

**Review Date:**

Pending Action by the NCI for this experiment

1. \_\_\_\_\_ None
2. \_\_\_\_\_ Repeat testing in the Primary Screen
3. \_\_\_\_\_ Refer to Biological Evaluation Committee
4. \_\_\_\_\_ Currently under Review by Biological Evaluation Committee

# National Cancer Institute Developmental Therapeutics Program In-Vitro Testing Results

|                                  |                                       |                |               |
|----------------------------------|---------------------------------------|----------------|---------------|
| NSC : D - 720780 / 1             | Experiment ID : 0104BS79              | Test Type : 08 | Units : Molar |
| Report Date : September 01, 2011 | Test Date : April 16, 2001            | QNS :          | MC :          |
| COMI : 25EpiRitt (7334)          | Stain Reagent : SRB Dual-Pass Related | SSPL : 0GZS    |               |

| Panel/Cell Line                   | Log10 Concentration |       |                        |       |       |       |        |       |                |      |      |      |            |            | GI50       | TGI | LC50 |
|-----------------------------------|---------------------|-------|------------------------|-------|-------|-------|--------|-------|----------------|------|------|------|------------|------------|------------|-----|------|
|                                   | Time                |       | Mean Optical Densities |       |       |       |        |       | Percent Growth |      |      |      |            |            |            |     |      |
|                                   | Zero                | Ctrl  | -10.0                  | -9.0  | -8.0  | -7.0  | -6.0   | -10.0 | -9.0           | -8.0 | -7.0 | -6.0 | -5.0       | -4.0       |            |     |      |
| <b>Leukemia</b>                   |                     |       |                        |       |       |       |        |       |                |      |      |      |            |            |            |     |      |
| CCR5-CEM                          | 0.366               | 1.038 | 0.468                  | 0.417 | 0.377 | 0.341 | 0.329  | 15    | 8              | 2    | -7   | -10  | < 1.00E-10 | 1.52E-8    | > 1.00E-6  |     |      |
| HL-60(TB)                         | 1.200               | 2.124 | 1.534                  | 1.211 | 0.895 | 0.907 | 0.811  | 36    | 1              | -25  | -24  | -32  | < 1.00E-10 | 1.10E-9    | > 1.00E-6  |     |      |
| K-562                             | 0.272               | 1.054 | 0.369                  | 0.237 | 0.299 | 0.205 | 0.185  | 12    | -13            | 3    | -25  | -32  | < 1.00E-10 | .          | > 1.00E-6  |     |      |
| MOLT-4                            | 0.618               | 1.321 | 0.452                  | 0.352 | 0.420 | 0.362 | 0.308  | -27   | -43            | -32  | -41  | -50  | < 1.00E-10 | < 1.00E-10 | 9.39E-7    |     |      |
| RPMI-8226                         | 0.582               | 1.347 | 0.321                  | 0.475 | 0.466 | 0.398 | 0.321  | -45   | -18            | -20  | -32  | -45  | < 1.00E-10 | < 1.00E-10 | > 1.00E-6  |     |      |
| <b>Non-Small Cell Lung Cancer</b> |                     |       |                        |       |       |       |        |       |                |      |      |      |            |            |            |     |      |
| A549/ATCC                         | 0.206               | 1.081 | 0.435                  | 0.449 | 0.428 | 0.423 | 0.328  | 26    | 28             | 25   | 25   | 14   | < 1.00E-10 | > 1.00E-6  | > 1.00E-6  |     |      |
| EKVX                              | 0.411               | 0.712 | 0.596                  | 0.544 | 0.520 | 0.513 | 0.217  | 61    | 44             | 36   | 34   | -47  | 4.54E-10   | 2.61E-7    | > 1.00E-6  |     |      |
| HOP-62                            | 0.419               | 0.848 | 0.550                  | 0.488 | 0.435 | 0.452 | 0.406  | 30    | 16             | 4    | 8    | -3   | < 1.00E-10 | 5.07E-7    | > 1.00E-6  |     |      |
| NCI-H226                          | 0.823               | 1.250 | 0.935                  | 0.824 | 0.758 | 0.747 | 0.575  | 26    | .              | -8   | -9   | -30  | < 1.00E-10 | 1.07E-9    | > 1.00E-6  |     |      |
| NCI-H23                           | 0.249               | 0.697 | 0.382                  | 0.345 | 0.339 | 0.279 | 0.098  | 30    | 21             | 20   | 7    | -61  | < 1.00E-10 | 1.26E-7    | 6.91E-7    |     |      |
| NCI-H322M                         | 0.528               | 1.223 | 1.015                  | 1.032 | 0.885 | 0.922 | 0.588  | 70    | 72             | 51   | 57   | 9    | 1.37E-7    | > 1.00E-6  | > 1.00E-6  |     |      |
| NCI-H460                          | 0.235               | 1.527 | 0.282                  | 0.267 | 0.185 | 0.174 | 0.120  | 4     | 2              | -21  | -26  | -49  | < 1.00E-10 | 1.27E-9    | > 1.00E-6  |     |      |
| <b>Colon Cancer</b>               |                     |       |                        |       |       |       |        |       |                |      |      |      |            |            |            |     |      |
| COLO 205                          | 0.387               | 1.040 | 0.629                  | 0.181 | 0.086 | 0.044 | 0.018  | 37    | -53            | -78  | -89  | -95  | < 1.00E-10 | 2.57E-10   | 9.18E-10   |     |      |
| HCC-2998                          | 0.346               | 0.482 | 0.477                  | 0.402 | 0.442 | 0.463 | 0.327  | 96    | 41             | 70   | 86   | -6   | .          | 8.67E-7    | > 1.00E-6  |     |      |
| HCT-116                           | 0.138               | 0.560 | 0.233                  | 0.179 | 0.170 | 0.134 | 0.035  | 22    | 10             | 8    | -3   | -75  | < 1.00E-10 | 5.01E-8    | 4.48E-7    |     |      |
| HCT-15                            | 0.123               | 0.727 | 0.636                  | 0.501 | 0.290 | 0.128 | 0.029  | 85    | 63             | 28   | 1    | -77  | 2.29E-9    | 1.02E-7    | 4.51E-7    |     |      |
| KM12                              | 0.344               | 1.163 | 0.770                  | 0.768 | 0.541 | 0.539 | 0.266  | 52    | 52             | 24   | 24   | -23  | 1.16E-9    | 3.24E-7    | > 1.00E-6  |     |      |
| SW-620                            | 0.194               | 0.930 | 0.302                  | 0.288 | 0.176 | 0.136 | 0.017  | 15    | 13             | -9   | -30  | -91  | < 1.00E-10 | 3.80E-9    | 2.11E-7    |     |      |
| <b>CNS Cancer</b>                 |                     |       |                        |       |       |       |        |       |                |      |      |      |            |            |            |     |      |
| SF-268                            | 0.385               | 1.135 | 0.758                  | 0.597 | 0.592 | 0.552 | 0.324  | 50    | 28             | 28   | 22   | -16  | < 1.00E-10 | 3.82E-7    | > 1.00E-6  |     |      |
| SF-295                            | 0.522               | 1.260 | 0.302                  | 0.268 | 0.226 | 0.194 | 0.168  | -42   | -49            | -57  | -63  | -68  | < 1.00E-10 | < 1.00E-10 | 1.46E-9    |     |      |
| SF-539                            | 0.581               | 1.462 | 0.452                  | 0.375 | 0.215 | 0.221 | 0.094  | -22   | -36            | -63  | -62  | -84  | < 1.00E-10 | < 1.00E-10 | 3.36E-9    |     |      |
| SNB-19                            | 0.298               | 1.217 | 0.614                  | 0.647 | 0.573 | 0.524 | 0.186  | 34    | 38             | 30   | 25   | -38  | < 1.00E-10 | 2.49E-7    | > 1.00E-6  |     |      |
| U251                              | 0.297               | 1.067 | 0.467                  | 0.444 | 0.389 | 0.339 | 0.235  | 22    | 19             | 12   | 5    | -21  | < 1.00E-10 | 1.61E-7    | > 1.00E-6  |     |      |
| <b>Melanoma</b>                   |                     |       |                        |       |       |       |        |       |                |      |      |      |            |            |            |     |      |
| LOX IMVI                          | 0.300               | 1.544 | 0.413                  | 0.330 | 0.258 | 0.232 | 0.159  | 9     | 2              | -14  | -23  | -47  | < 1.00E-10 | 1.40E-9    | > 1.00E-6  |     |      |
| MALME-3M                          | 0.719               | 1.255 | 0.925                  | 0.811 | 0.683 | 0.683 | 0.536  | 38    | 17             | -5   | -5   | -25  | < 1.00E-10 | 5.90E-9    | > 1.00E-6  |     |      |
| M14                               | 0.194               | 0.540 | 0.409                  | 0.284 | 0.158 | 0.097 | 0.037  | 62    | 26             | -19  | -50  | -81  | 2.16E-10   | 3.80E-9    | 1.00E-7    |     |      |
| MDA-MB-435                        | 0.525               | 1.713 | 0.755                  | 0.557 | 0.388 | 0.315 | 0.255  | 19    | 3              | -26  | -40  | -51  | < 1.00E-10 | 1.24E-9    | 7.50E-7    |     |      |
| MDA-N                             | 0.247               | 0.935 | 0.399                  | 0.167 | 0.098 | 0.112 | 0.015  | 22    | -33            | -60  | -55  | -94  | < 1.00E-10 | 2.53E-10   | 4.24E-9    |     |      |
| SK-MEL-2                          | 0.399               | 0.722 | 0.397                  | 0.391 | 0.316 | 0.307 | 0.172  | -1    | -2             | -21  | -23  | -57  | < 1.00E-10 | < 1.00E-10 | 6.20E-7    |     |      |
| SK-MEL-5                          | 0.471               | 1.830 | 0.560                  | 0.191 | 0.098 | 0.075 | -0.009 | 7     | -60            | -79  | -84  | -100 | < 1.00E-10 | 1.25E-10   | 7.17E-10   |     |      |
| UACC-62                           | 0.781               | 1.392 | 0.243                  | 0.208 | 0.141 | 0.159 | 0.072  | -69   | -73            | -82  | -80  | -91  | < 1.00E-10 | < 1.00E-10 | < 1.00E-10 |     |      |
| <b>Ovarian Cancer</b>             |                     |       |                        |       |       |       |        |       |                |      |      |      |            |            |            |     |      |
| IGROV1                            | 0.565               | 1.002 | 0.452                  | 0.445 | 0.398 | 0.394 | 0.254  | -20   | -21            | -30  | -30  | -55  | < 1.00E-10 | < 1.00E-10 | 6.21E-7    |     |      |
| OVCAR-3                           | 0.698               | 1.097 | 0.761                  | 0.835 | 0.820 | 0.908 | 0.742  | 16    | 34             | 30   | 53   | 11   | .          | > 1.00E-6  | > 1.00E-6  |     |      |
| OVCAR-5                           | 0.331               | 0.766 | 0.602                  | 0.447 | 0.424 | 0.390 | 0.174  | 62    | 27             | 21   | 13   | -48  | 2.20E-10   | 1.66E-7    | > 1.00E-6  |     |      |
| OVCAR-8                           | 0.373               | 1.492 | 1.022                  | 0.970 | 0.839 | 0.812 | 0.609  | 58    | 53             | 42   | 39   | 21   | 1.92E-9    | > 1.00E-6  | > 1.00E-6  |     |      |
| NCI/ADR-RES                       | 0.470               | 1.086 | 0.968                  | 0.943 | 0.834 | 0.714 | 0.520  | 81    | 77             | 59   | 40   | 8    | 2.92E-8    | > 1.00E-6  | > 1.00E-6  |     |      |
| SK-OV-3                           | 0.809               | 1.232 | 0.947                  | 0.855 | 0.678 | 0.565 | 0.428  | 33    | 11             | -16  | -30  | -47  | < 1.00E-10 | 2.52E-9    | > 1.00E-6  |     |      |
| <b>Renal Cancer</b>               |                     |       |                        |       |       |       |        |       |                |      |      |      |            |            |            |     |      |
| 786-0                             | 0.248               | 0.625 | 0.298                  | 0.238 | 0.205 | 0.212 | 0.065  | 13    | -4             | -17  | -15  | -74  | < 1.00E-10 | 5.73E-10   | 3.97E-7    |     |      |
| A498                              | 0.974               | 1.579 | 1.160                  | 1.043 | 0.802 | 0.380 | 0.073  | 31    | 11             | -18  | -61  | -93  | < 1.00E-10 | 2.46E-9    | 5.56E-8    |     |      |
| ACHN                              | 0.271               | 1.109 | 0.673                  | 0.639 | 0.555 | 0.492 | 0.349  | 48    | 44             | 34   | 26   | 9    | < 1.00E-10 | > 1.00E-6  | > 1.00E-6  |     |      |
| CAKI-1                            | 0.768               | 1.430 | 0.768                  | 0.605 | 0.537 | 0.442 | 0.379  | .     | -21            | -30  | -43  | -51  | < 1.00E-10 | < 1.00E-10 | 8.18E-7    |     |      |
| RXF 393                           | 0.797               | 1.036 | 0.372                  | 0.407 | 0.332 | 0.447 | 0.252  | -53   | -49            | -58  | -44  | -68  | < 1.00E-10 | < 1.00E-10 | .          |     |      |
| SN12C                             | 0.389               | 0.867 | 0.727                  | 0.697 | 0.623 | 0.585 | 0.457  | 71    | 64             | 49   | 41   | 14   | 8.49E-9    | > 1.00E-6  | > 1.00E-6  |     |      |
| TK-10                             | 0.557               | 1.315 | 0.912                  | 0.763 | 0.558 | 0.736 | 0.554  | 47    | 27             | .    | 24   | -1   | < 1.00E-10 | 9.50E-7    | > 1.00E-6  |     |      |
| UO-31                             | 0.457               | 1.140 | 0.466                  | 0.423 | 0.360 | 0.263 | 0.107  | 1     | -7             | -21  | -42  | -77  | < 1.00E-10 | 1.39E-10   | 1.66E-7    |     |      |
| <b>Prostate Cancer</b>            |                     |       |                        |       |       |       |        |       |                |      |      |      |            |            |            |     |      |
| PC-3                              | 0.266               | 0.672 | 0.370                  | 0.313 | 0.285 | 0.273 | 0.207  | 25    | 11             | 5    | 2    | -22  | < 1.00E-10 | 1.17E-7    | > 1.00E-6  |     |      |
| DU-145                            | 0.444               | 0.946 | 0.739                  | 0.799 | 0.679 | 0.647 | 0.422  | 59    | 71             | 47   | 40   | -5   | 7.32E-9    | 7.78E-7    | > 1.00E-6  |     |      |
| <b>Breast Cancer</b>              |                     |       |                        |       |       |       |        |       |                |      |      |      |            |            |            |     |      |
| MCF7                              | 0.459               | 1.484 | 0.522                  | 0.474 | 0.349 | 0.288 | 0.139  | 6     | 1              | -24  | -37  | -70  | < 1.00E-10 | 1.14E-9    | 2.46E-7    |     |      |
| MDA-MB-231/ATCC                   | 0.431               | 0.776 | 0.597                  | 0.539 | 0.476 | 0.466 | 0.270  | 48    | 31             | 13   | 10   | -37  | < 1.00E-10 | 1.63E-7    | > 1.00E-6  |     |      |
| HS 578T                           | 0.539               | 0.947 | 0.308                  | 0.253 | 0.266 | 0.229 | 0.115  | -43   | -53            | -51  | -58  | -79  | < 1.00E-10 | < 1.00E-10 | 4.91E-10   |     |      |
| BT-549                            | 0.705               | 1.739 | 1.204                  | 1.164 | 1.116 | 1.090 | 0.852  | 48    | 44             | 40   | 37   | 14   | < 1.00E-10 | > 1.00E-6  | > 1.00E-6  |     |      |
| T-47D                             | 0.305               | 0.590 | 0.433                  | 0.377 | 0.388 | 0.387 | 0.301  | 45    | 25             | 29   | 29   | -1   | < 1.00E-10 | 8.93E-7    | > 1.00E-6  |     |      |

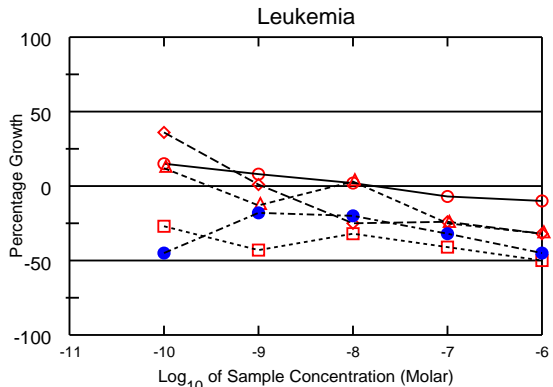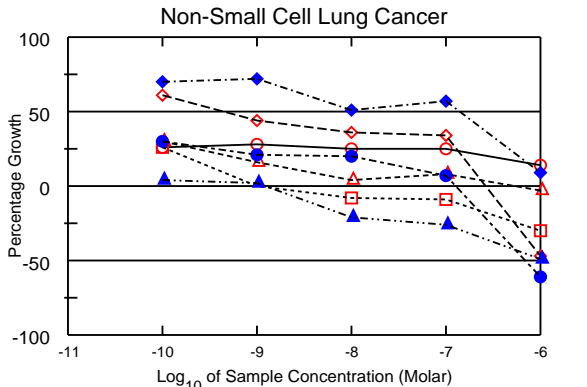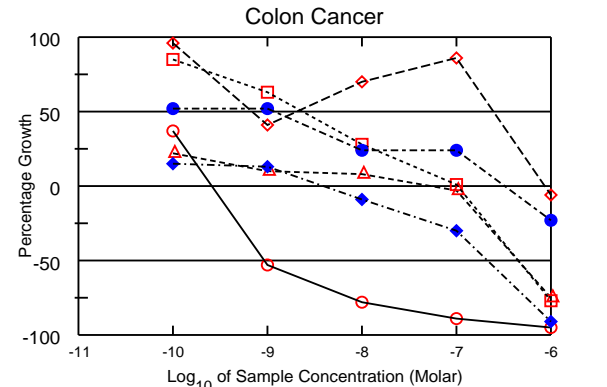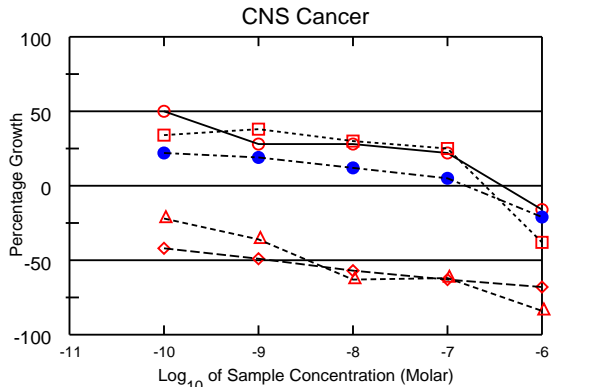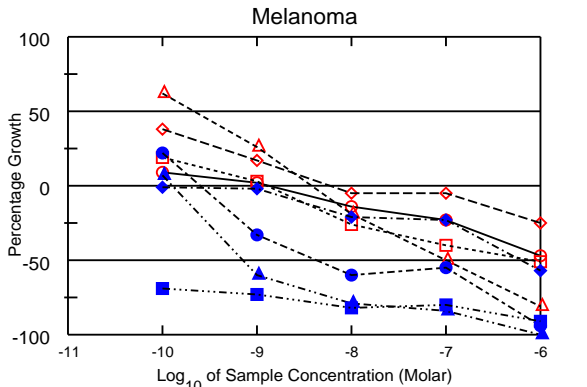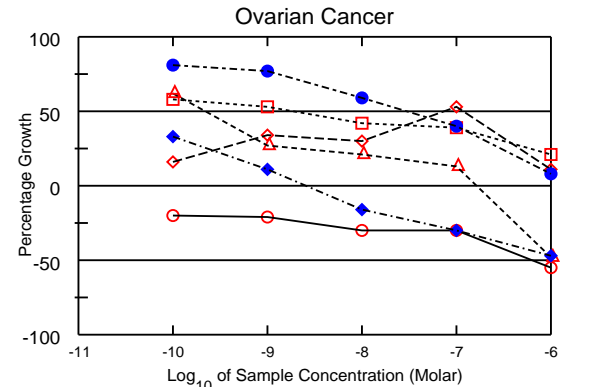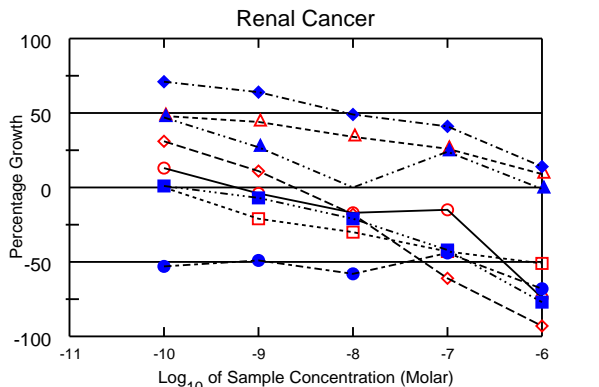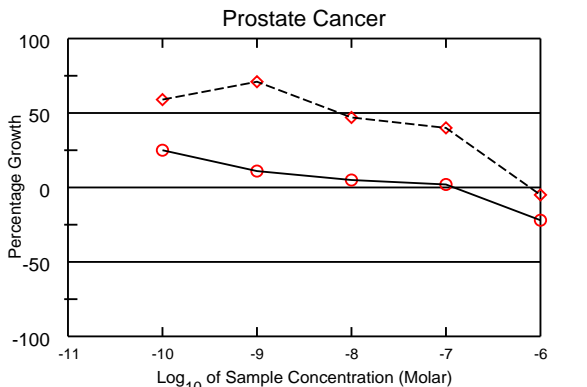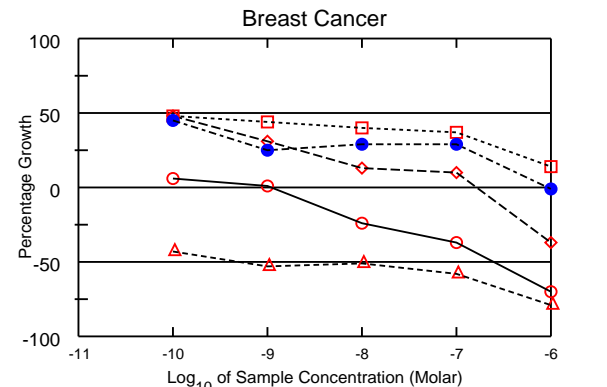

| National Cancer Institute Developmental Therapeutics Program |                        | NSC : D - 720780/1              |                       | Units :Molar |                        | SSPL :0GZS                |   | EXP. ID :0104BS79 |   |
|--------------------------------------------------------------|------------------------|---------------------------------|-----------------------|--------------|------------------------|---------------------------|---|-------------------|---|
| Mean Graphs                                                  |                        | Report Date :September 01, 2011 |                       |              |                        | Test Date :April 16, 2001 |   |                   |   |
| Panel/Cell Line                                              | Log <sub>10</sub> GI50 | GI50                            | Log <sub>10</sub> TGI | TGI          | Log <sub>10</sub> LC50 | LC50                      |   |                   |   |
| -----                                                        |                        |                                 |                       |              |                        |                           |   |                   |   |
| Leukemia                                                     |                        |                                 |                       |              |                        |                           |   |                   |   |
| CCRF-CEM                                                     | ^                      | -10.00                          | ^                     | -7.82        | ^                      | -6.00                     | ^ | -6.00             | ^ |
| HL-60(TB)                                                    | ^                      | -10.00                          | ^                     | -8.96        | ^                      | -6.00                     | ^ | -6.00             | ^ |
| K-562                                                        | ^                      | -10.00                          | ^                     | -10.00       | ^                      | -6.00                     | ^ | -6.00             | ^ |
| MOLT-4                                                       | ^                      | -10.00                          | ^                     | -10.00       | ^                      | -6.03                     | ^ | -6.03             | ^ |
| RPMI-8226                                                    | ^                      | -10.00                          | ^                     | -10.00       | ^                      | -6.00                     | ^ | -6.00             | ^ |
| -----                                                        |                        |                                 |                       |              |                        |                           |   |                   |   |
| Non-Small Cell Lung Cancer                                   |                        |                                 |                       |              |                        |                           |   |                   |   |
| A549/ATCC                                                    | ^                      | -10.00                          | >                     | -6.00        | ^                      | -6.00                     | ^ | -6.00             | ^ |
| EKVX                                                         | ^                      | -9.34                           | ^                     | -6.58        | ^                      | -6.00                     | ^ | -6.00             | ^ |
| HOP-62                                                       | ^                      | -10.00                          | ^                     | -6.30        | ^                      | -6.00                     | ^ | -6.00             | ^ |
| NCI-H226                                                     | ^                      | -10.00                          | ^                     | -8.97        | ^                      | -6.00                     | ^ | -6.00             | ^ |
| NCI-H23                                                      | ^                      | -10.00                          | ^                     | -6.90        | ^                      | -6.16                     | ^ | -6.16             | ^ |
| NCI-H322M                                                    | ^                      | -6.86                           | ^                     | -6.00        | ^                      | -6.00                     | ^ | -6.00             | ^ |
| NCI-H460                                                     | ^                      | -10.00                          | ^                     | -8.90        | ^                      | -6.00                     | ^ | -6.00             | ^ |
| -----                                                        |                        |                                 |                       |              |                        |                           |   |                   |   |
| Colon Cancer                                                 |                        |                                 |                       |              |                        |                           |   |                   |   |
| COLO 205                                                     | ^                      | -10.00                          | ^                     | -9.59        | ^                      | -9.04                     | ^ | -9.04             | ^ |
| HCC-2998                                                     | ^                      | -10.00                          | ^                     | -6.06        | ^                      | -6.00                     | ^ | -6.00             | ^ |
| HCT-116                                                      | ^                      | -10.00                          | ^                     | -7.30        | ^                      | -6.35                     | ^ | -6.35             | ^ |
| HCT-15                                                       | ^                      | -8.64                           | ^                     | -6.99        | ^                      | -6.35                     | ^ | -6.35             | ^ |
| KM12                                                         | ^                      | -8.94                           | ^                     | -6.49        | ^                      | -6.00                     | ^ | -6.00             | ^ |
| SW-620                                                       | ^                      | -10.00                          | ^                     | -8.42        | ^                      | -6.68                     | ^ | -6.68             | ^ |
| -----                                                        |                        |                                 |                       |              |                        |                           |   |                   |   |
| CNS Cancer                                                   |                        |                                 |                       |              |                        |                           |   |                   |   |
| SF-268                                                       | ^                      | -10.00                          | ^                     | -6.42        | ^                      | -6.00                     | ^ | -6.00             | ^ |
| SF-295                                                       | ^                      | -10.00                          | ^                     | -10.00       | ^                      | -8.84                     | ^ | -8.84             | ^ |
| SF-539                                                       | ^                      | -10.00                          | ^                     | -10.00       | ^                      | -8.47                     | ^ | -8.47             | ^ |
| SNB-19                                                       | ^                      | -10.00                          | ^                     | -6.60        | ^                      | -6.00                     | ^ | -6.00             | ^ |
| U251                                                         | ^                      | -10.00                          | ^                     | -6.79        | ^                      | -6.00                     | ^ | -6.00             | ^ |
| -----                                                        |                        |                                 |                       |              |                        |                           |   |                   |   |
| Melanoma                                                     |                        |                                 |                       |              |                        |                           |   |                   |   |
| LOX IMVI                                                     | ^                      | -10.00                          | ^                     | -8.85        | ^                      | -6.00                     | ^ | -6.00             | ^ |
| MALME-3M                                                     | ^                      | -10.00                          | ^                     | -8.23        | ^                      | -6.00                     | ^ | -6.00             | ^ |
| M14                                                          | ^                      | -9.67                           | ^                     | -8.42        | ^                      | -7.00                     | ^ | -7.00             | ^ |
| MDA-MB-435                                                   | ^                      | -10.00                          | ^                     | -8.91        | ^                      | -6.13                     | ^ | -6.13             | ^ |
| MDA-N                                                        | ^                      | -10.00                          | ^                     | -9.60        | ^                      | -8.37                     | ^ | -8.37             | ^ |
| SK-MEL-2                                                     | ^                      | -10.00                          | ^                     | -10.00       | ^                      | -6.21                     | ^ | -6.21             | ^ |
| SK-MEL-5                                                     | ^                      | -10.00                          | ^                     | -9.90        | ^                      | -9.14                     | ^ | -9.14             | ^ |
| UACC-62                                                      | ^                      | -10.00                          | ^                     | -10.00       | ^                      | -10.00                    | ^ | -10.00            | ^ |
| -----                                                        |                        |                                 |                       |              |                        |                           |   |                   |   |
| Ovarian Cancer                                               |                        |                                 |                       |              |                        |                           |   |                   |   |
| IGROV1                                                       | ^                      | -10.00                          | ^                     | -10.00       | ^                      | -6.21                     | ^ | -6.21             | ^ |
| OVCAR-3                                                      | ^                      | -10.00                          | ^                     | -6.00        | ^                      | -6.00                     | ^ | -6.00             | ^ |
| OVCAR-5                                                      | ^                      | -9.66                           | ^                     | -6.78        | ^                      | -6.00                     | ^ | -6.00             | ^ |
| OVCAR-8                                                      | ^                      | -8.72                           | ^                     | -6.00        | ^                      | -6.00                     | ^ | -6.00             | ^ |
| NCI/ADR-RES                                                  | ^                      | -7.54                           | ^                     | -6.00        | ^                      | -6.00                     | ^ | -6.00             | ^ |
| SK-OV-3                                                      | ^                      | -10.00                          | ^                     | -8.60        | ^                      | -6.00                     | ^ | -6.00             | ^ |
| -----                                                        |                        |                                 |                       |              |                        |                           |   |                   |   |
| Renal Cancer                                                 |                        |                                 |                       |              |                        |                           |   |                   |   |
| 786-0                                                        | ^                      | -10.00                          | ^                     | -9.24        | ^                      | -6.40                     | ^ | -6.40             | ^ |
| A498                                                         | ^                      | -10.00                          | ^                     | -8.61        | ^                      | -7.25                     | ^ | -7.25             | ^ |
| ACHN                                                         | ^                      | -10.00                          | ^                     | -6.00        | ^                      | -6.00                     | ^ | -6.00             | ^ |
| CAKI-1                                                       | ^                      | -10.00                          | ^                     | -10.00       | ^                      | -6.00                     | ^ | -6.00             | ^ |
| RXF 393                                                      | ^                      | -10.00                          | ^                     | -10.00       | ^                      | -6.09                     | ^ | -6.09             | ^ |
| SN12C                                                        | ^                      | -8.07                           | ^                     | -6.00        | ^                      | -6.00                     | ^ | -6.00             | ^ |
| TK-10                                                        | ^                      | -10.00                          | ^                     | -6.02        | ^                      | -6.00                     | ^ | -6.00             | ^ |
| UO-31                                                        | ^                      | -10.00                          | ^                     | -9.86        | ^                      | -6.78                     | ^ | -6.78             | ^ |
| -----                                                        |                        |                                 |                       |              |                        |                           |   |                   |   |
| Prostate Cancer                                              |                        |                                 |                       |              |                        |                           |   |                   |   |
| PC-3                                                         | ^                      | -10.00                          | ^                     | -6.93        | ^                      | -6.00                     | ^ | -6.00             | ^ |
| DU-145                                                       | ^                      | -8.14                           | ^                     | -6.11        | ^                      | -6.00                     | ^ | -6.00             | ^ |
| -----                                                        |                        |                                 |                       |              |                        |                           |   |                   |   |
| Breast Cancer                                                |                        |                                 |                       |              |                        |                           |   |                   |   |
| MCF7                                                         | ^                      | -10.00                          | ^                     | -8.94        | ^                      | -6.61                     | ^ | -6.61             | ^ |
| MDA-MB-231/ATCC                                              | ^                      | -10.00                          | ^                     | -6.79        | ^                      | -6.00                     | ^ | -6.00             | ^ |
| HS 578T                                                      | ^                      | -10.00                          | ^                     | -10.00       | ^                      | -9.31                     | ^ | -9.31             | ^ |
| BT-549                                                       | ^                      | -10.00                          | ^                     | -6.00        | ^                      | -6.00                     | ^ | -6.00             | ^ |
| T-47D                                                        | ^                      | -10.00                          | ^                     | -6.05        | ^                      | -6.00                     | ^ | -6.00             | ^ |
| -----                                                        |                        |                                 |                       |              |                        |                           |   |                   |   |
| MID                                                          |                        |                                 |                       |              |                        |                           |   |                   |   |
| Delta                                                        |                        |                                 |                       |              |                        |                           |   |                   |   |
| Range                                                        |                        |                                 |                       |              |                        |                           |   |                   |   |
|                                                              | -9.71                  |                                 | -7.94                 |              | -6.54                  |                           |   |                   |   |
|                                                              | 0.29                   |                                 | 2.06                  |              | 3.46                   |                           |   |                   |   |
|                                                              | 3.14                   |                                 | 4.0                   |              | 4.0                    |                           |   |                   |   |

All Cell Lines

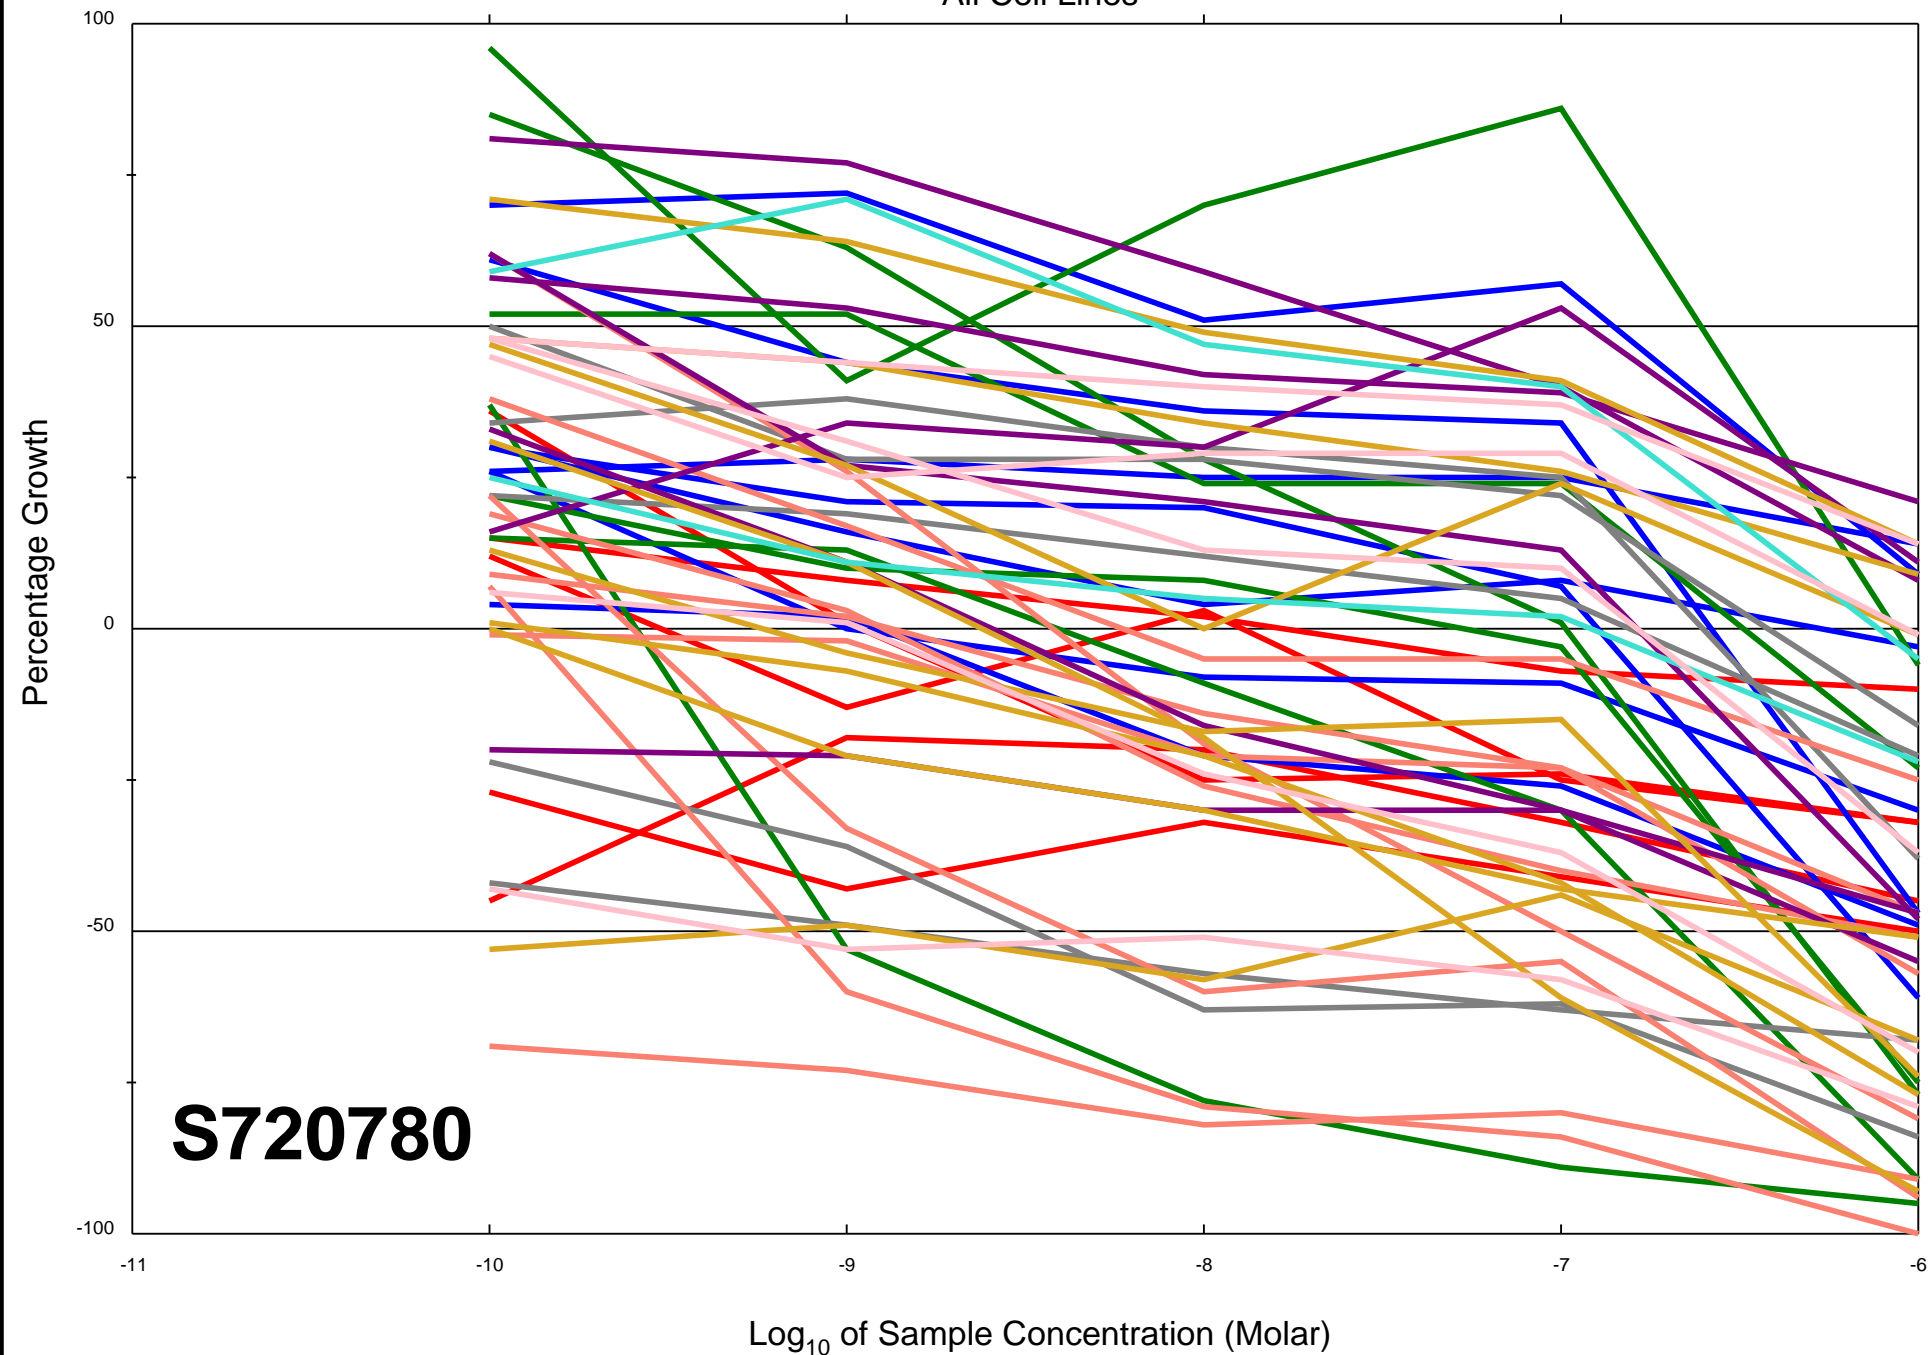

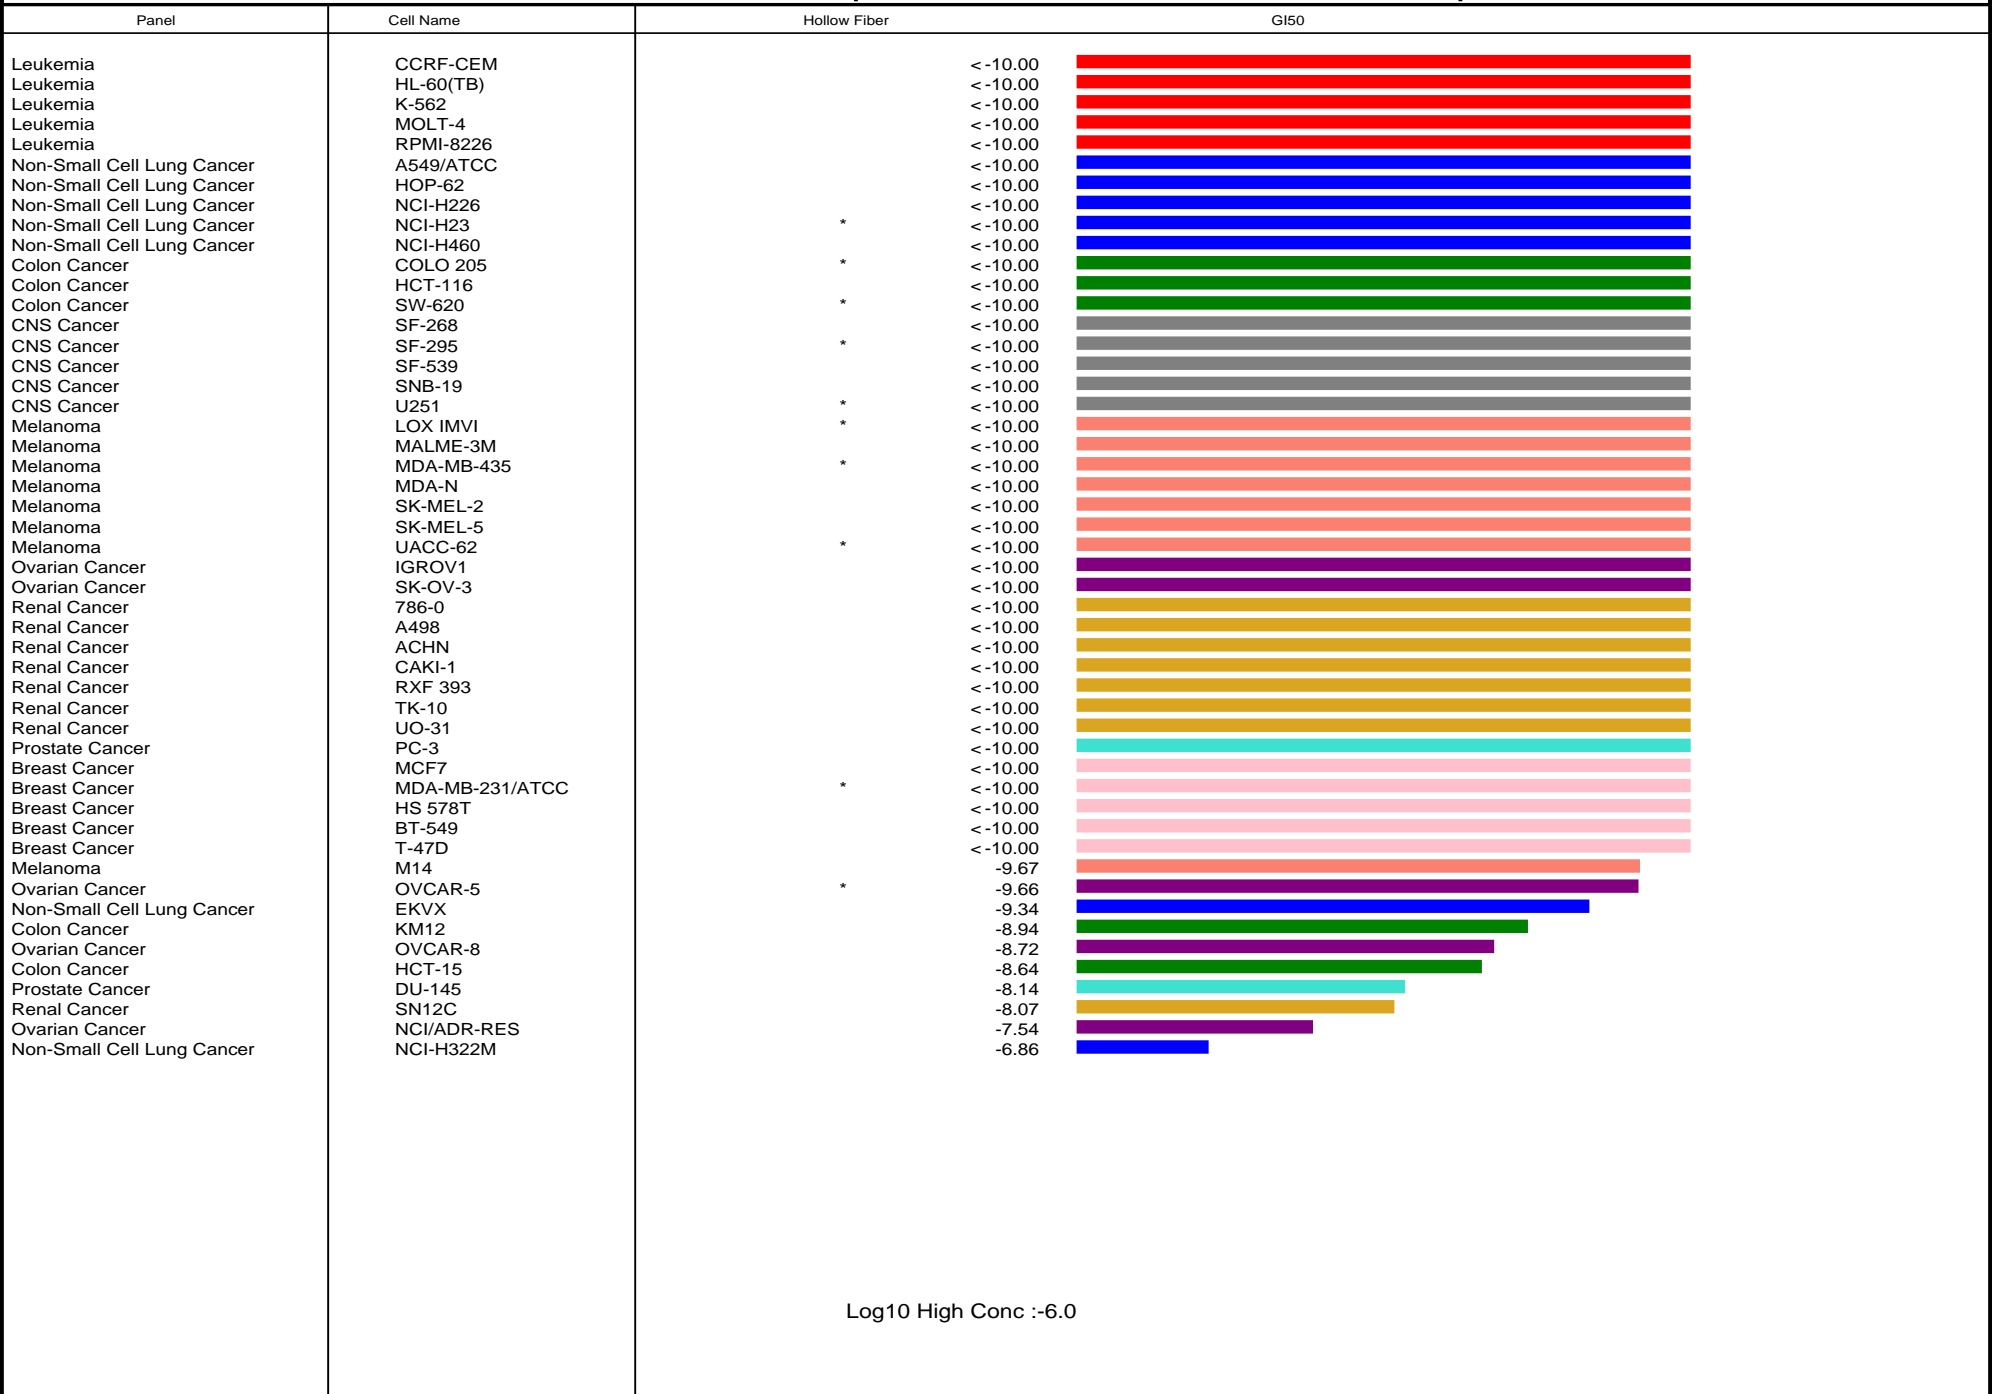

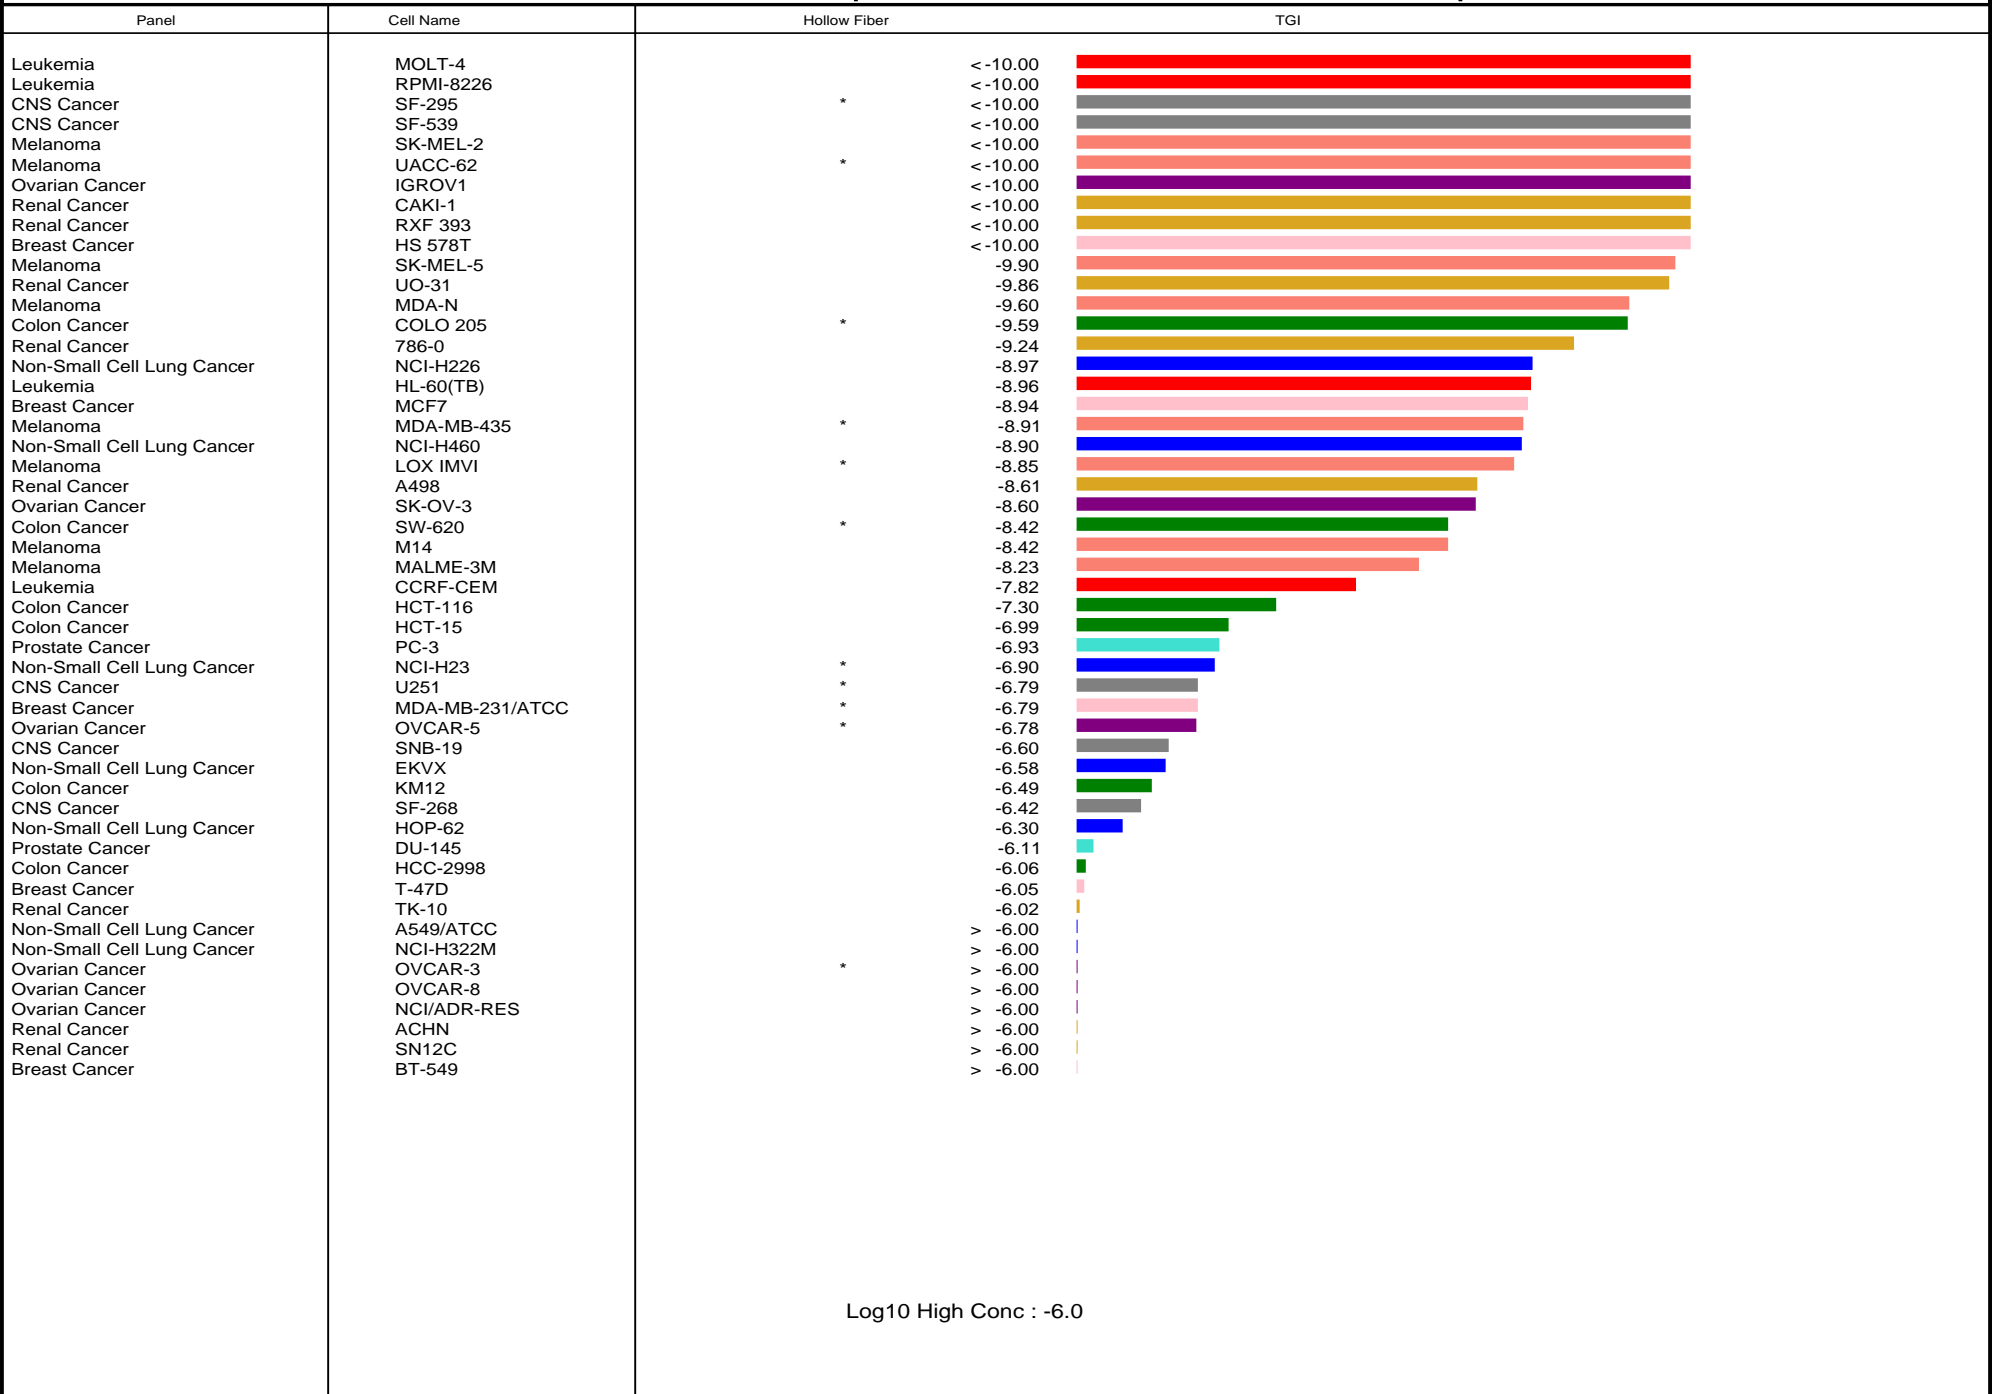

Log10 High Conc : -6.0

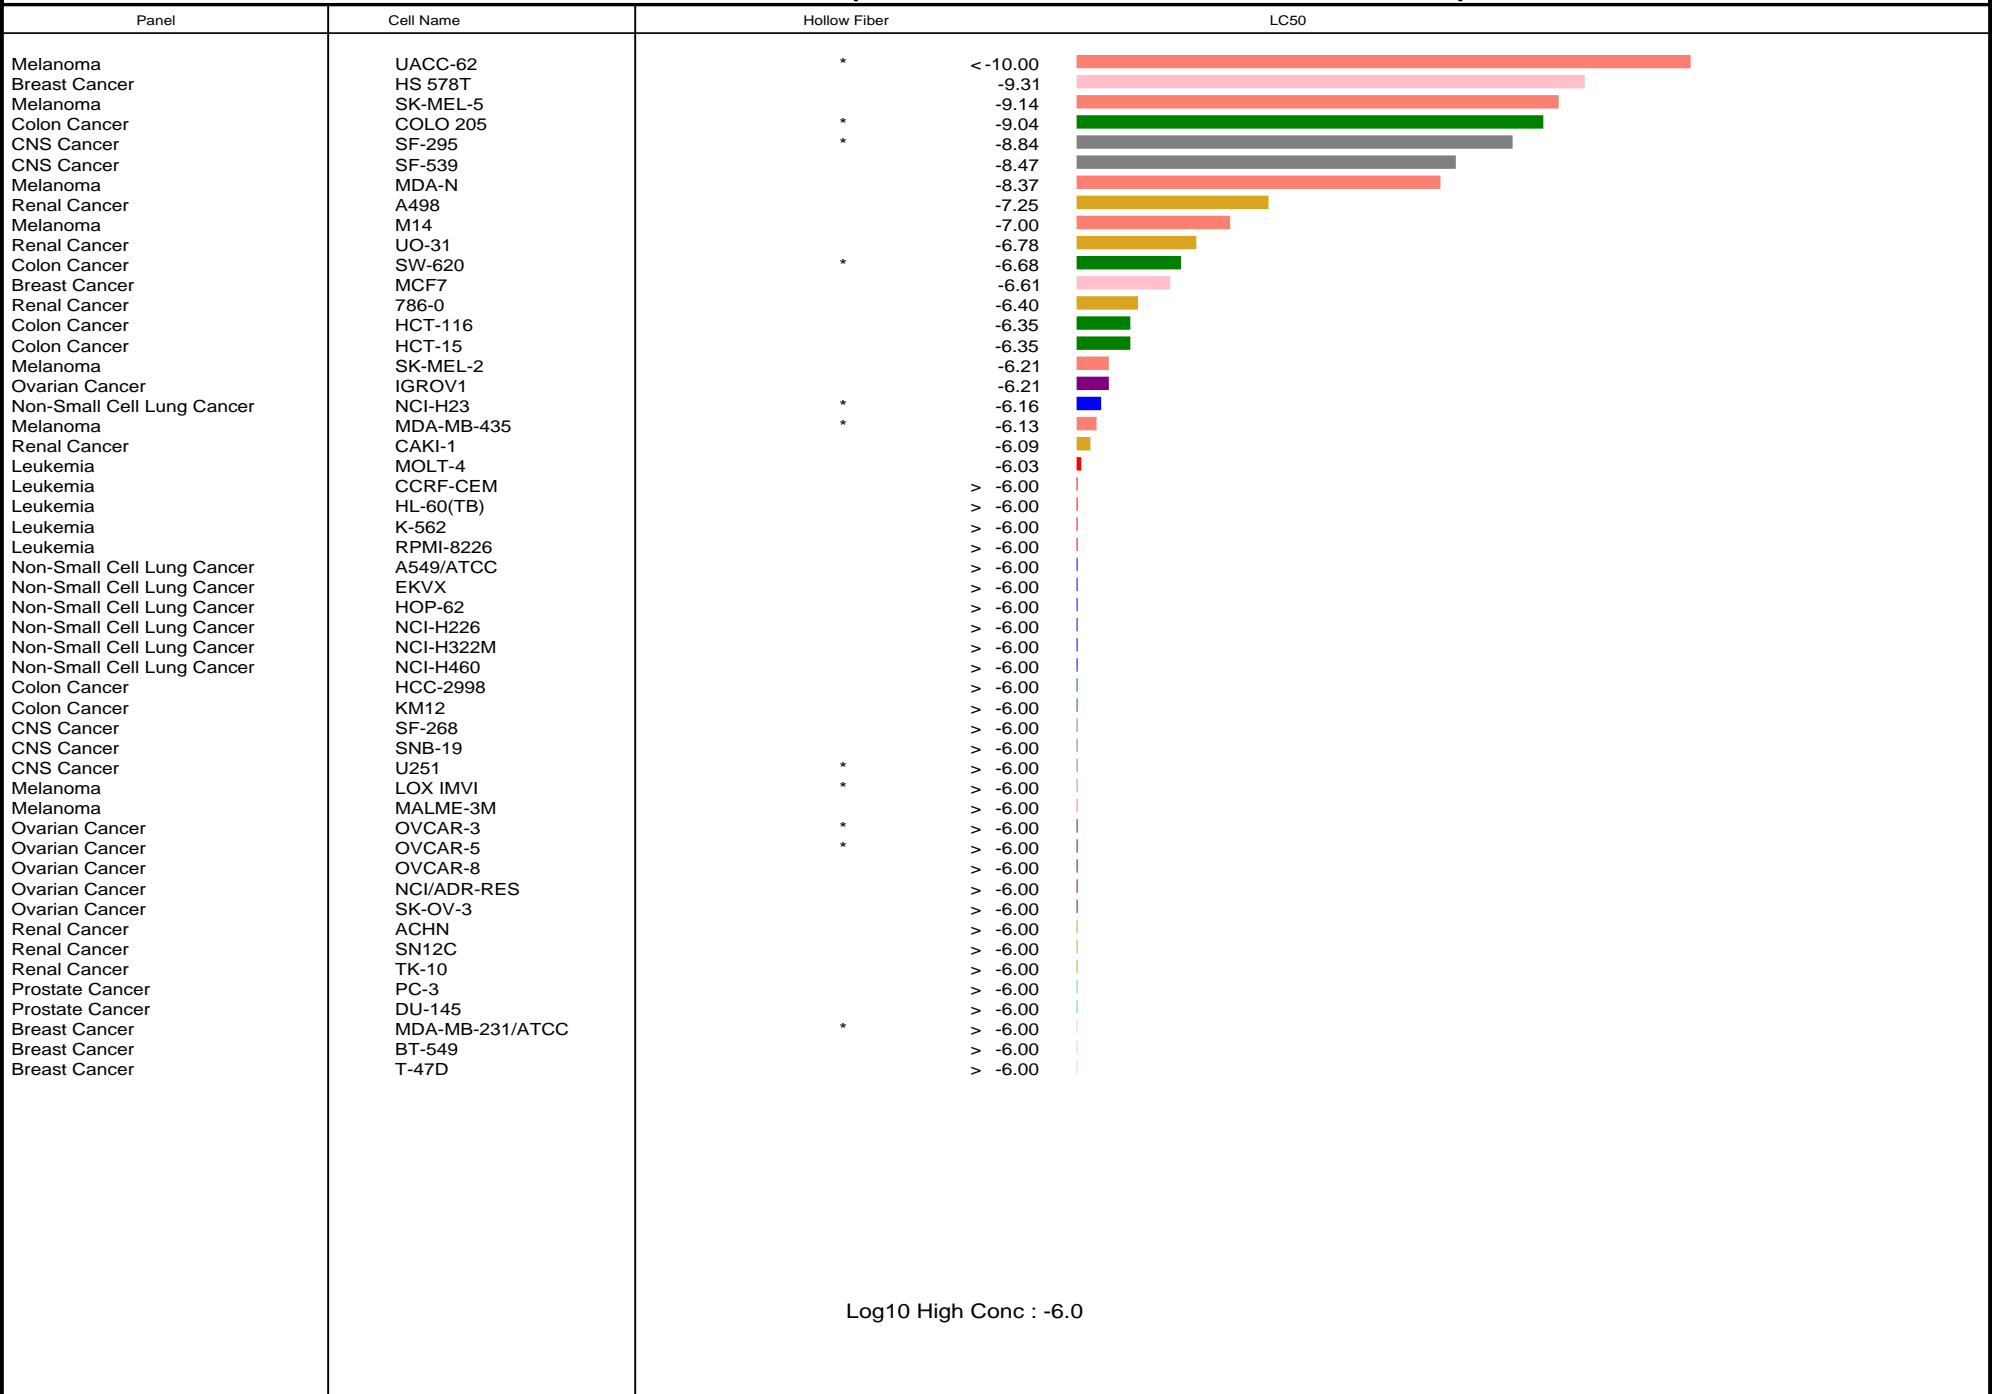

Supplement: NIHMS1626034-supplement-Supporting_info_3.pdf [file NIHMS1626034-supplement-Supporting_info_3.pdf]
