# Supplementary material
Source: PubMed Central journal article supplement (PMC7511990)
Supplement: NIHMS1626034-supplement-Supporting_info_1.pdf [file NIHMS1626034-supplement-Supporting_info_1.pdf]

# Supporting Information Contents

for

## A Convergent Total Synthesis of the Potent Cephalostatin/ Ritterazine hybrid - 25-*epi* Ritterostatin G<sub>N</sub>1<sub>N</sub>

Ananda Kumar Kanduluru<sup>\*,†</sup> Prabal Banerjee,<sup>†</sup> John A Beutler,<sup>‡</sup> and Philip L Fuchs<sup>\*,†</sup>

<sup>†</sup>*Department of Chemistry, Purdue University, West Lafayette, Indiana 47907, United States and*  
<sup>‡</sup>*Molecular Targets Laboratory, Center for Cancer Research, National Cancer Institute, Frederick,  
Maryland 21702, United States*

*kanduluruak@yahoo.com; pfuchs@purdue.edu*

- |                                                                                      |         |
|--------------------------------------------------------------------------------------|---------|
| 1) Table 1. Details on yields for complete synthesis                                 | S2-S3   |
| 2) Copies of <sup>1</sup> H, <sup>13</sup> C and <sup>19</sup> F NMR Spectra         | S4-S49  |
| 3) Mass Spectral data for 25- <i>epi</i> Ritterostatin G <sub>N</sub> 1 <sub>N</sub> | S50     |
| 4) HPLC data for 25- <i>epi</i> Ritterostatin G <sub>N</sub> 1 <sub>N</sub>          | S51     |
| 5) X-Ray crystallographic data for compound 22                                       | S52-S53 |
| 6) X-Ray crystallographic data for compound 27                                       | S54-S55 |
| 7) <i>In Vitro</i> NCI-60 cell line data (another file)                              |         |

**1).Table 1. Details on yields for synthesis (Schemes 1-3, manuscript)**

| Reactant      | Product   | Yield (%) |
|---------------|-----------|-----------|
| <b>6</b>      | <b>7</b>  | 85        |
| <b>7</b>      | <b>9</b>  | 82        |
| <b>9</b>      | <b>11</b> | 86        |
| <b>11</b>     | <b>12</b> | 72        |
| <b>12</b>     | <b>13</b> | 88        |
| <b>13</b>     | <b>14</b> | 80        |
| <b>14</b>     | <b>15</b> | 70        |
| <b>15</b>     | <b>16</b> | 85        |
| <b>16</b>     | <b>17</b> | 81        |
| <b>17</b>     | <b>18</b> | 95        |
| <b>18</b>     | <b>19</b> | 100       |
| <b>19</b>     | <b>21</b> | 74        |
| <b>21</b>     | <b>22</b> | 68        |
| <b>22</b>     | <b>23</b> | 71        |
| <b>23</b>     | <b>24</b> | 75        |
| <b>24</b>     | <b>25</b> | 82        |
| <b>25</b>     | <b>26</b> | 88        |
| <b>26</b>     | <b>27</b> | 85        |
| <b>27</b>     | <b>28</b> | 84        |
| <b>28</b>     | <b>29</b> | 81        |
| <b>29, 30</b> | <b>31</b> | 58        |

|           |          |           |
|-----------|----------|-----------|
| <b>31</b> | <b>5</b> | <b>95</b> |
|-----------|----------|-----------|

### 3. Spectral data

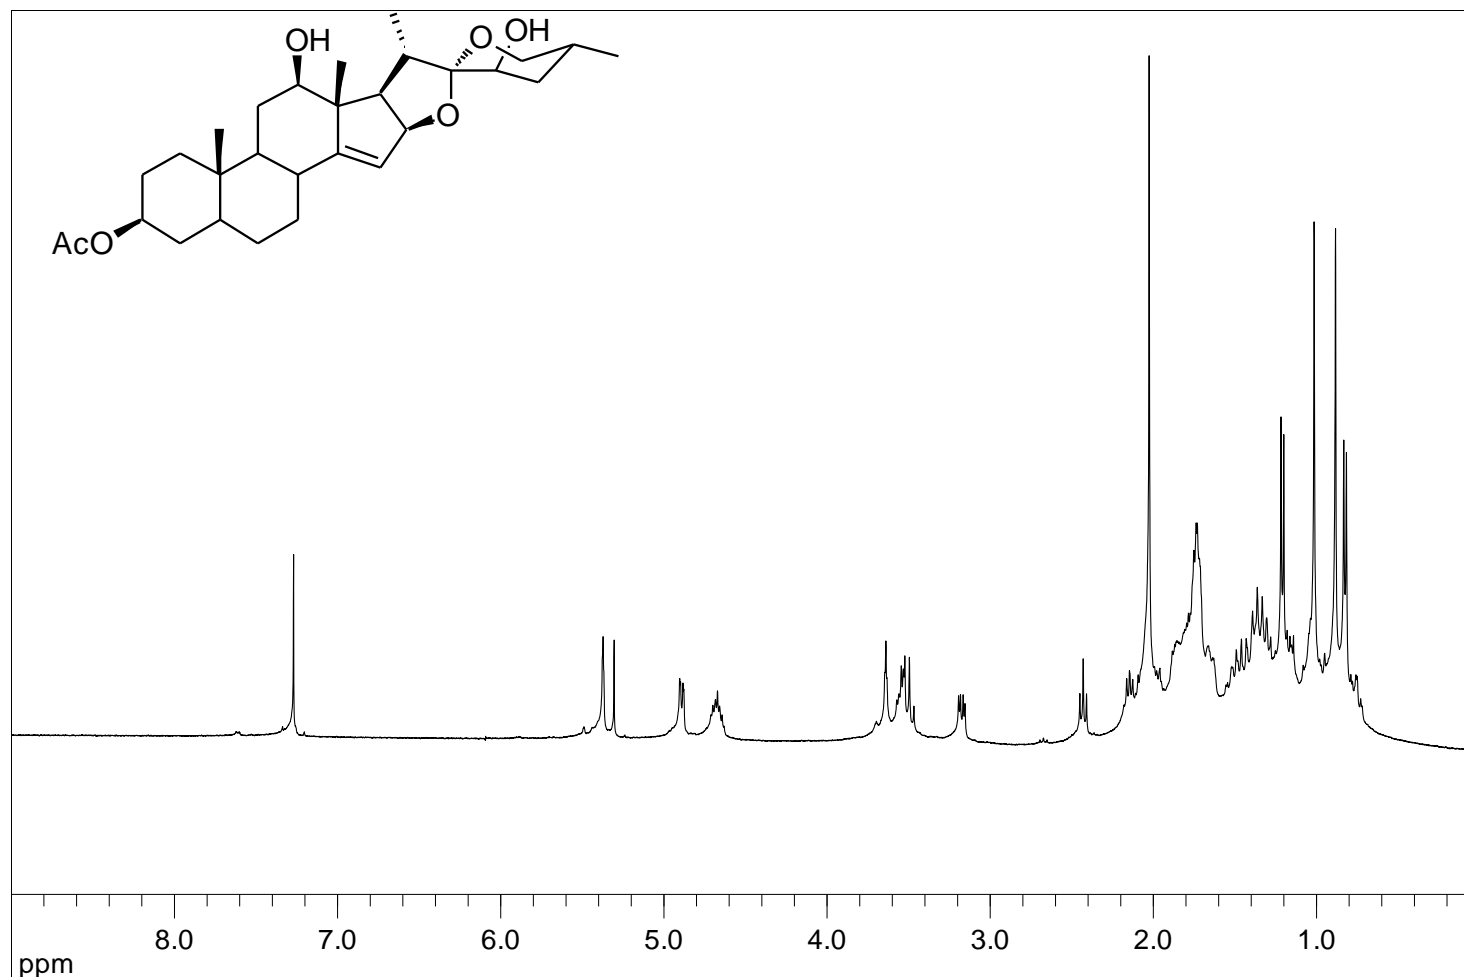

$^1\text{H-NMR}$  (400 MHz,  $\text{CDCl}_3$ ) of compound 10

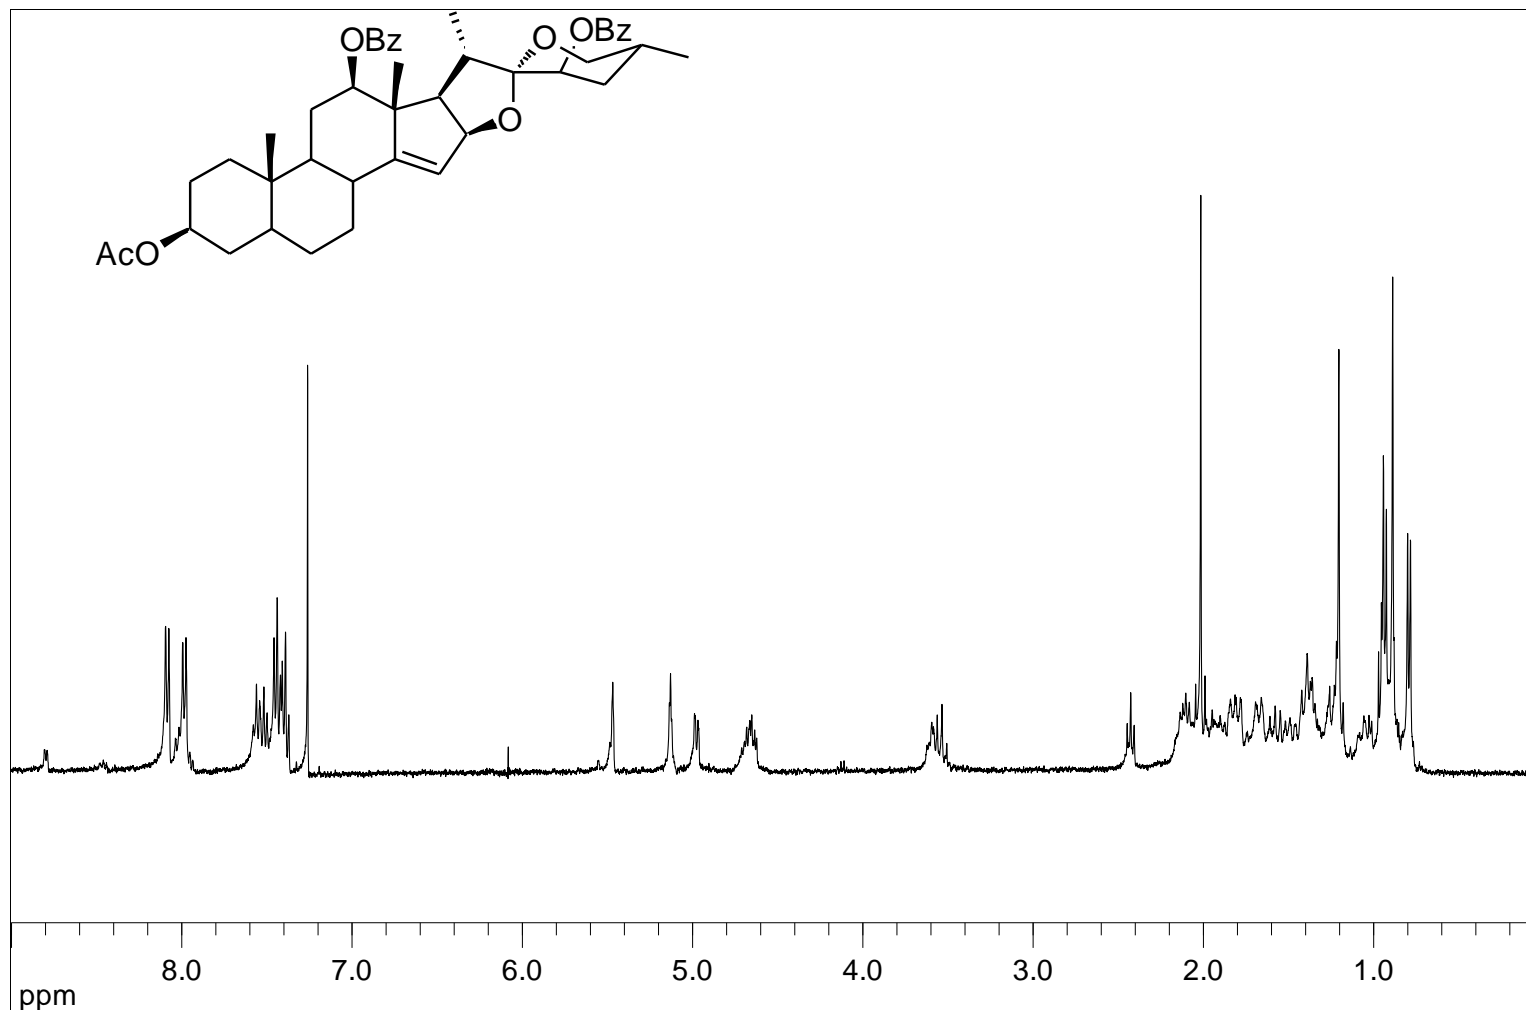

$^1\text{H-NMR}$  (400 MHz,  $\text{CDCl}_3$ ) of compound 11

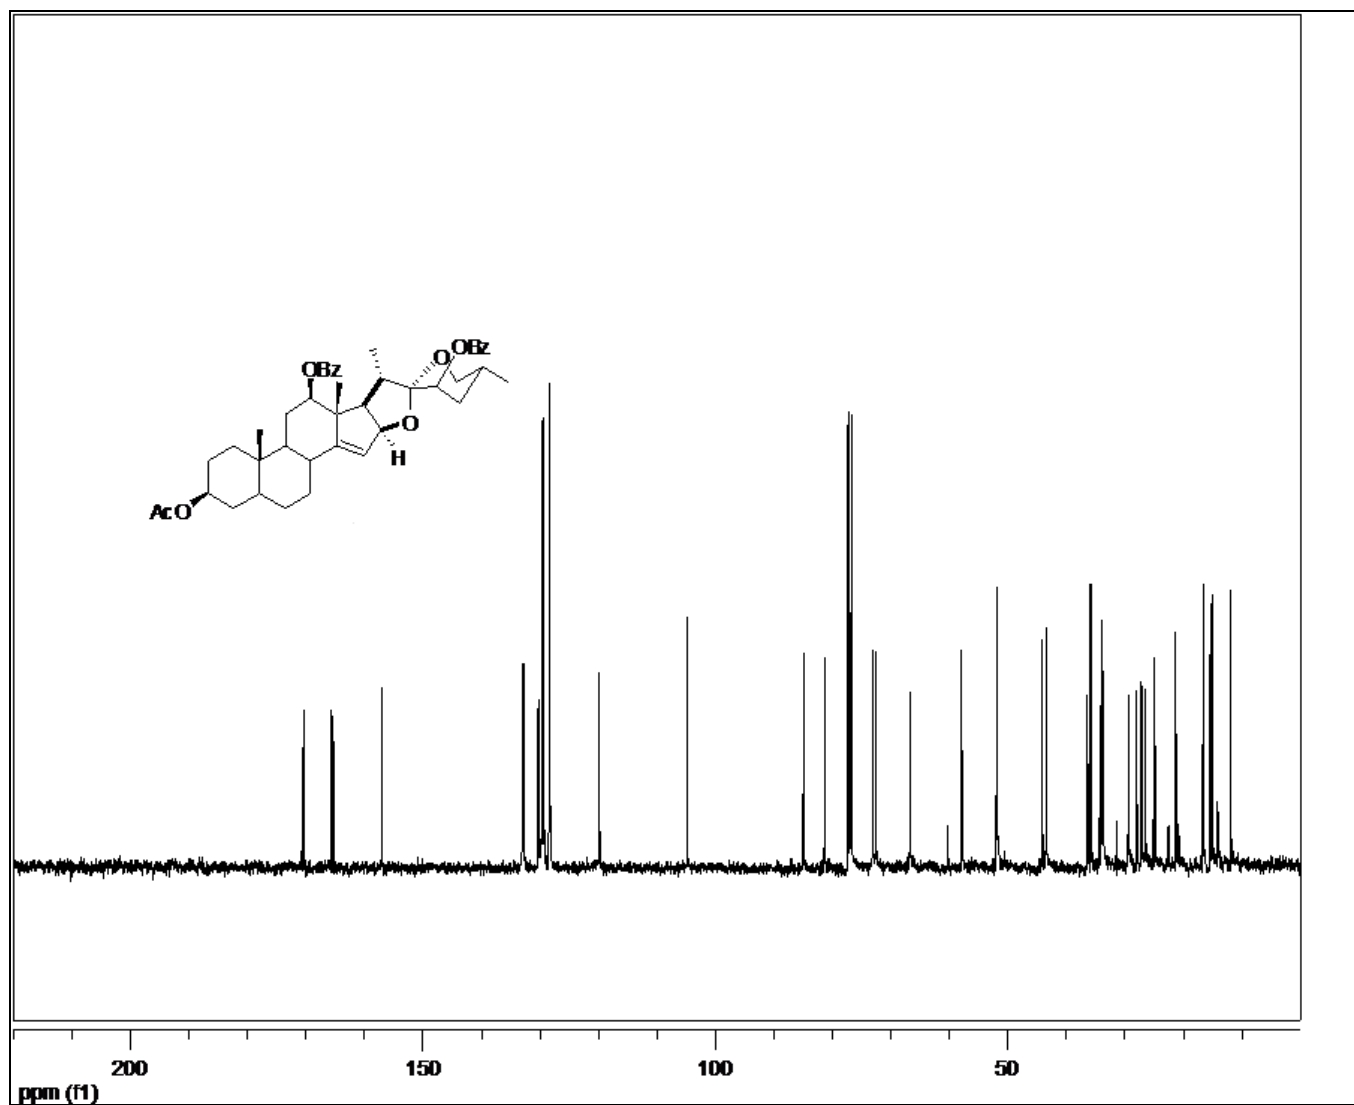 $^{13}\text{C}$  NMR (100 MHz,  $\text{CDCl}_3$ ) of compound 11

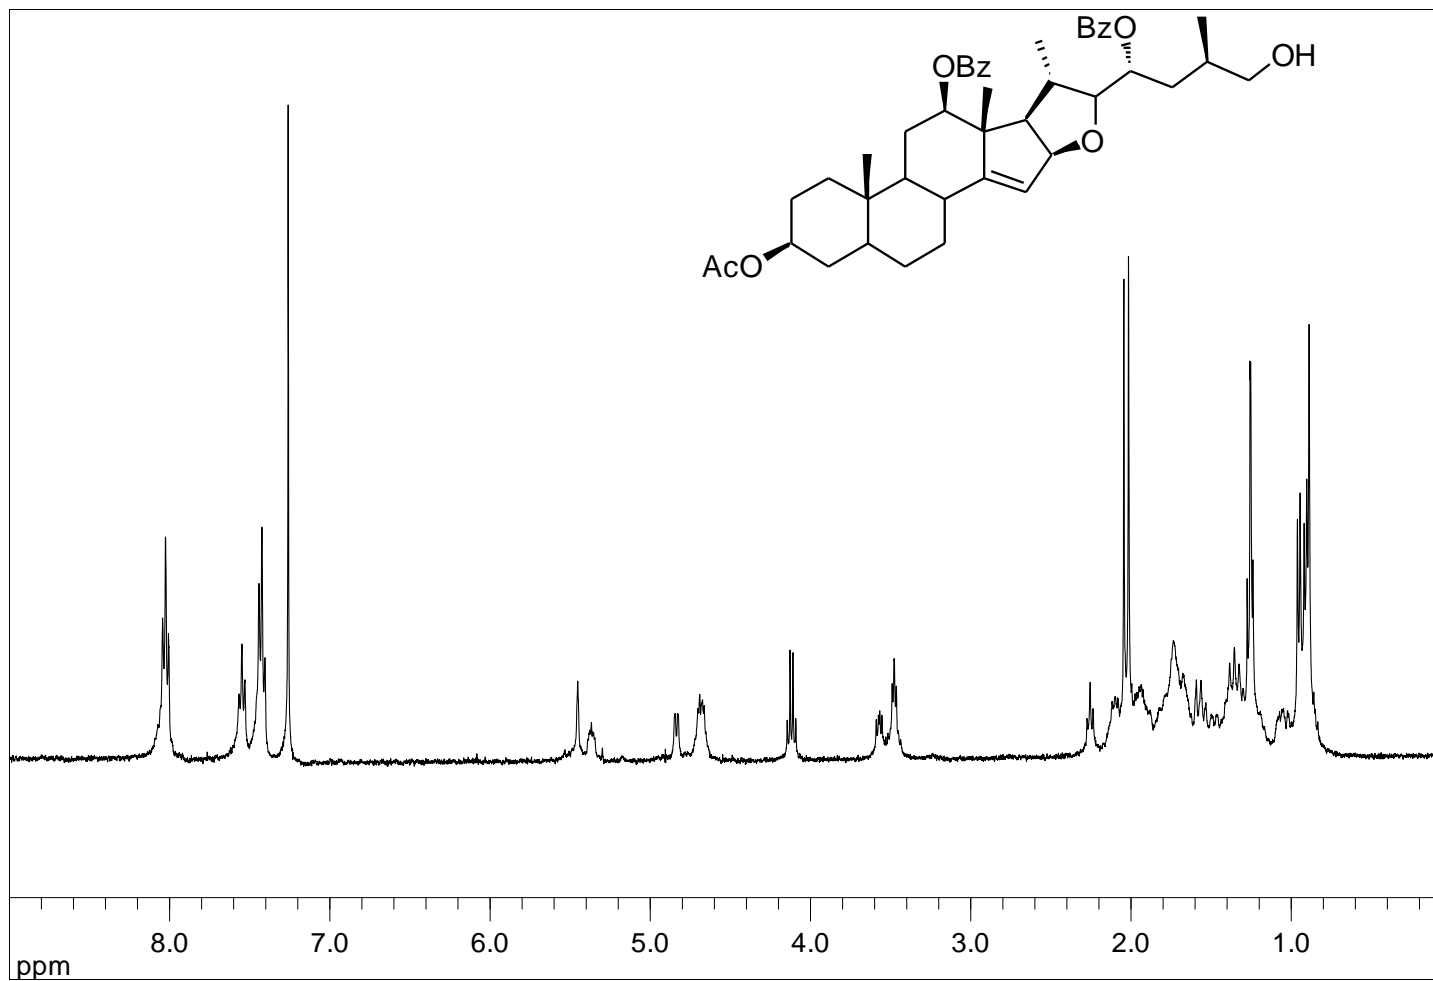

$^1\text{H-NMR}$  (400 MHz,  $\text{CDCl}_3$ ) of compound 12

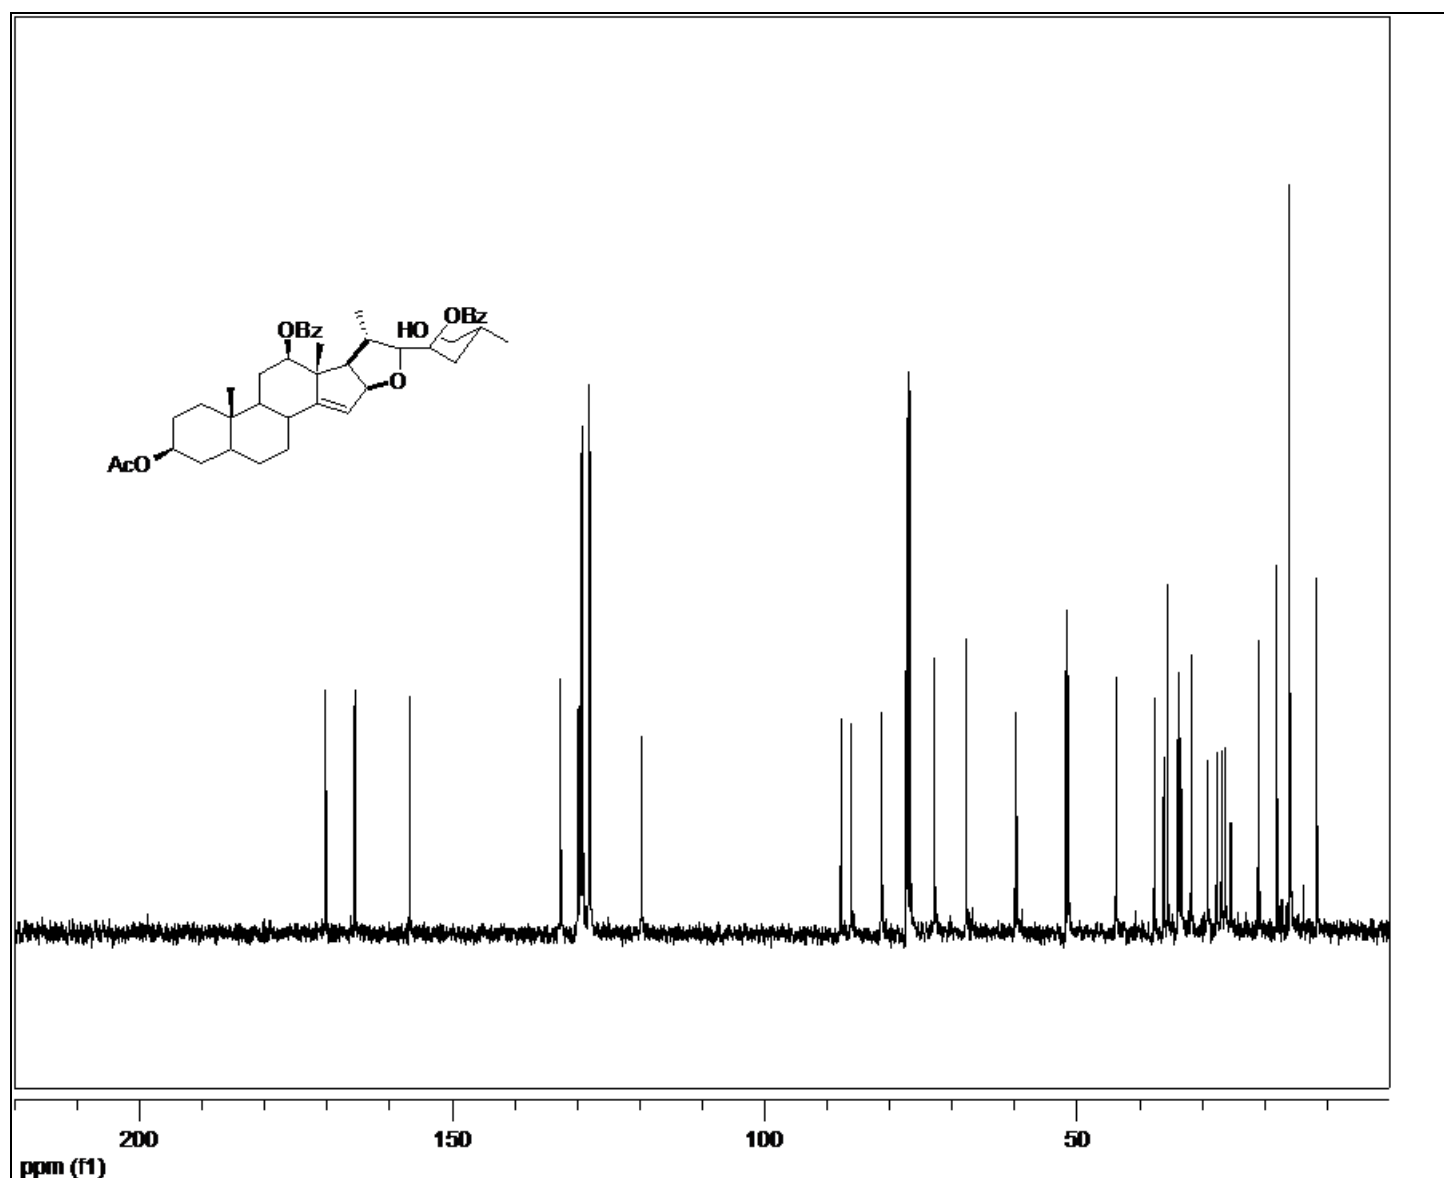

$^{13}\text{C}$  NMR (100 MHz,  $\text{CDCl}_3$ ) of compound 12



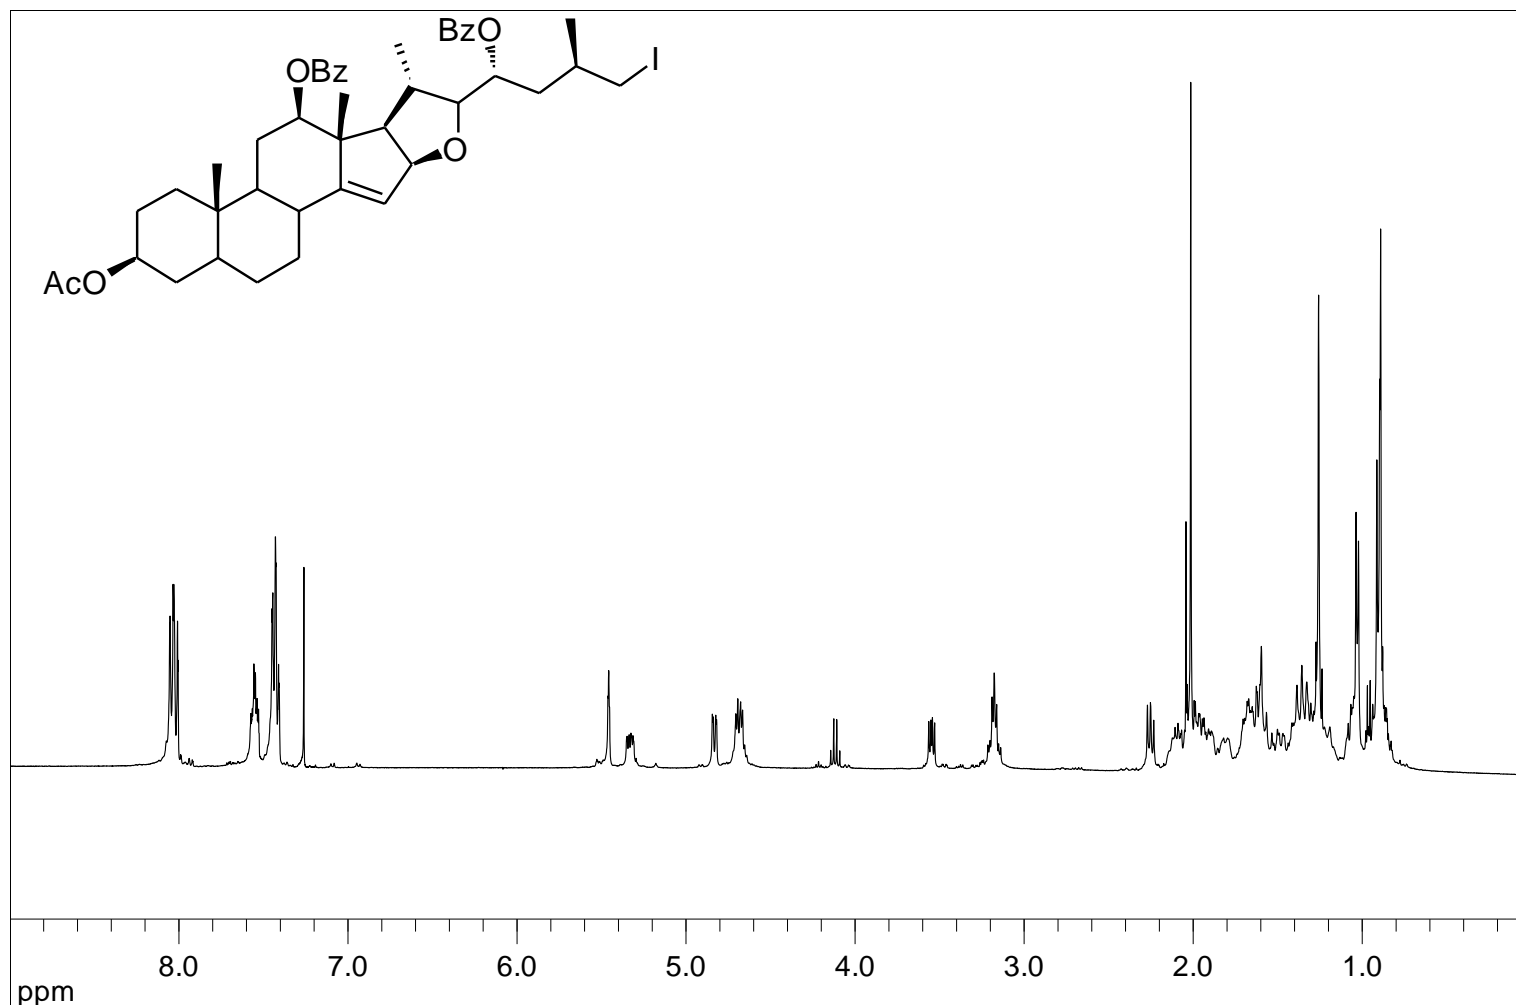

**<sup>1</sup>H-NMR (400 MHz, CDCl<sub>3</sub>) of compound 13**

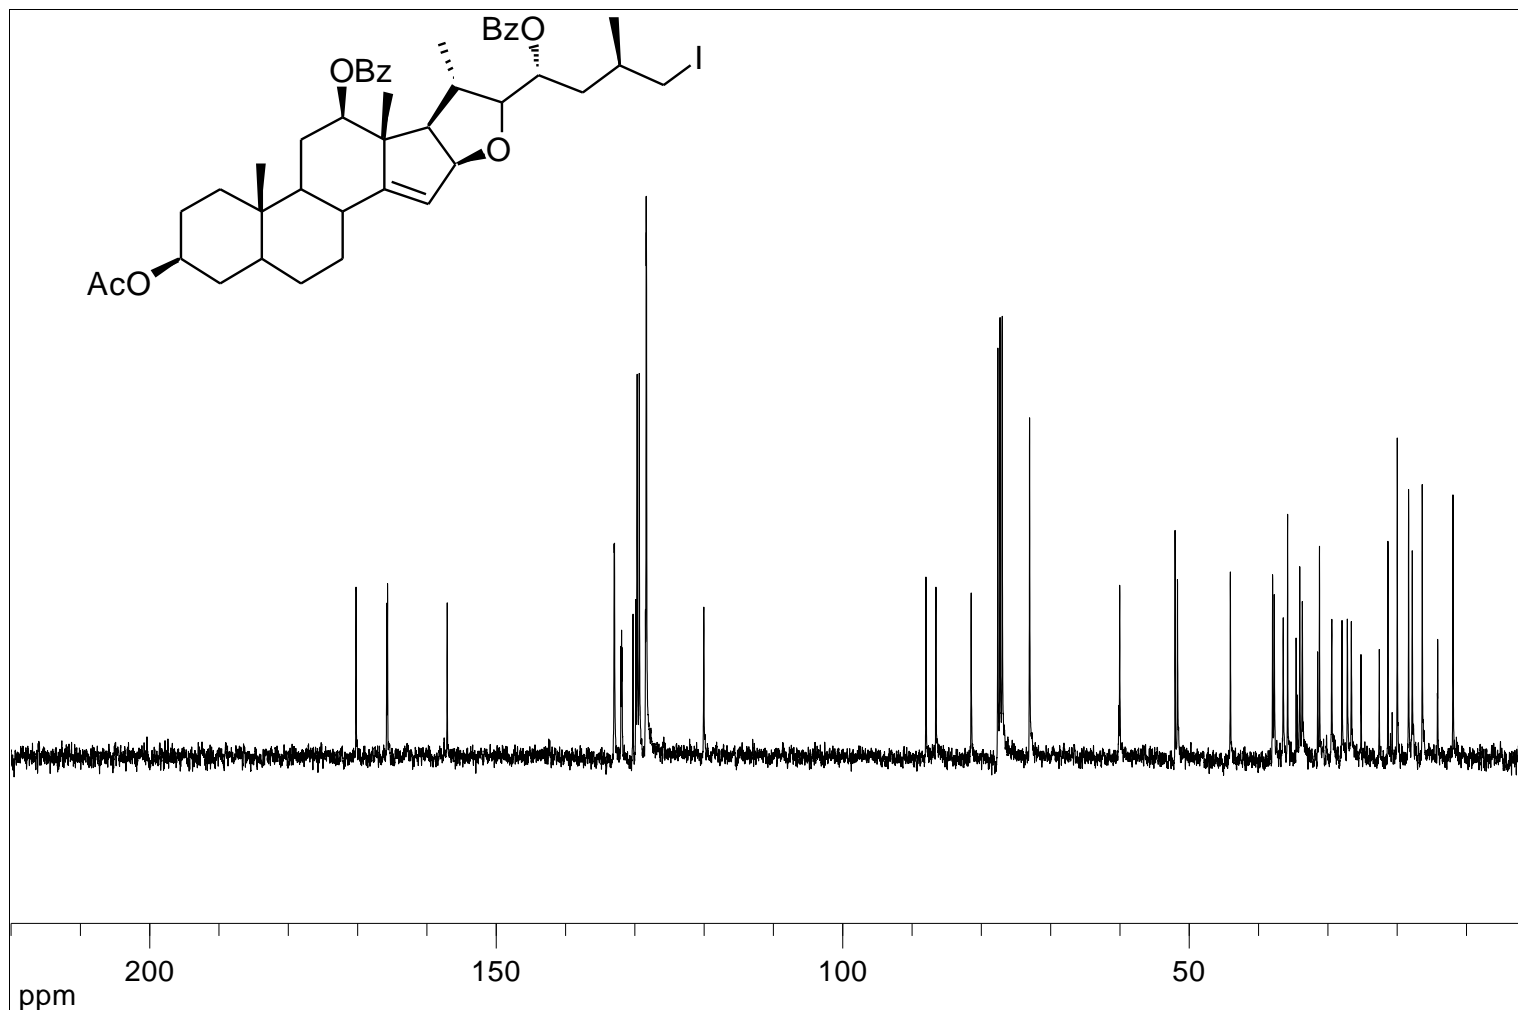 $^{13}\text{C}$  NMR (125 MHz,  $\text{CDCl}_3$ ) of compound 13

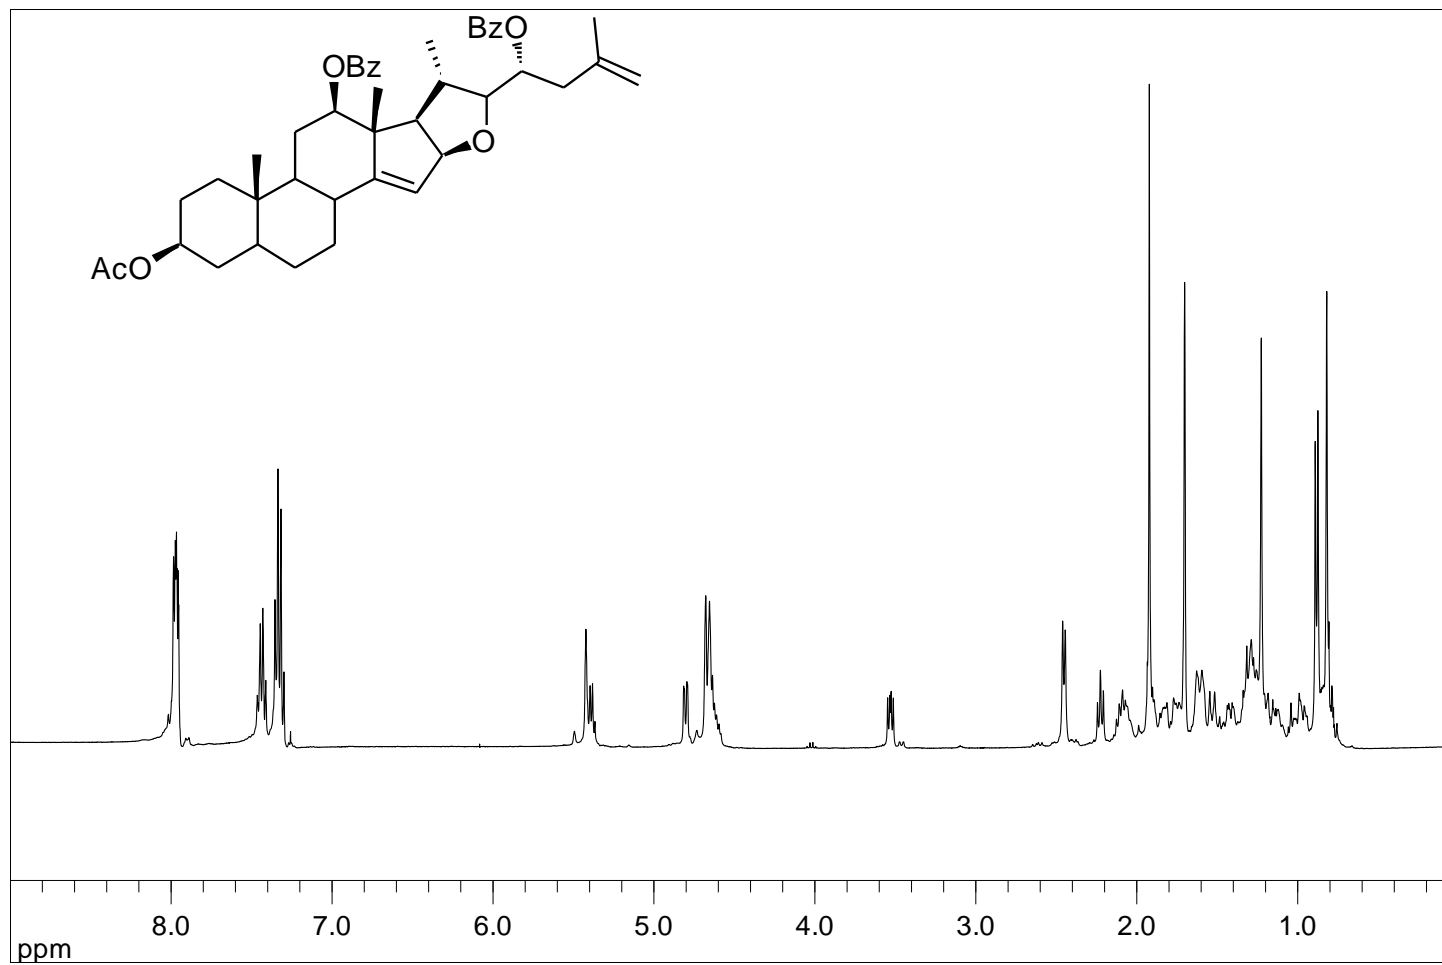

**<sup>1</sup>H-NMR (400 MHz, CDCl<sub>3</sub>) of compound 14**

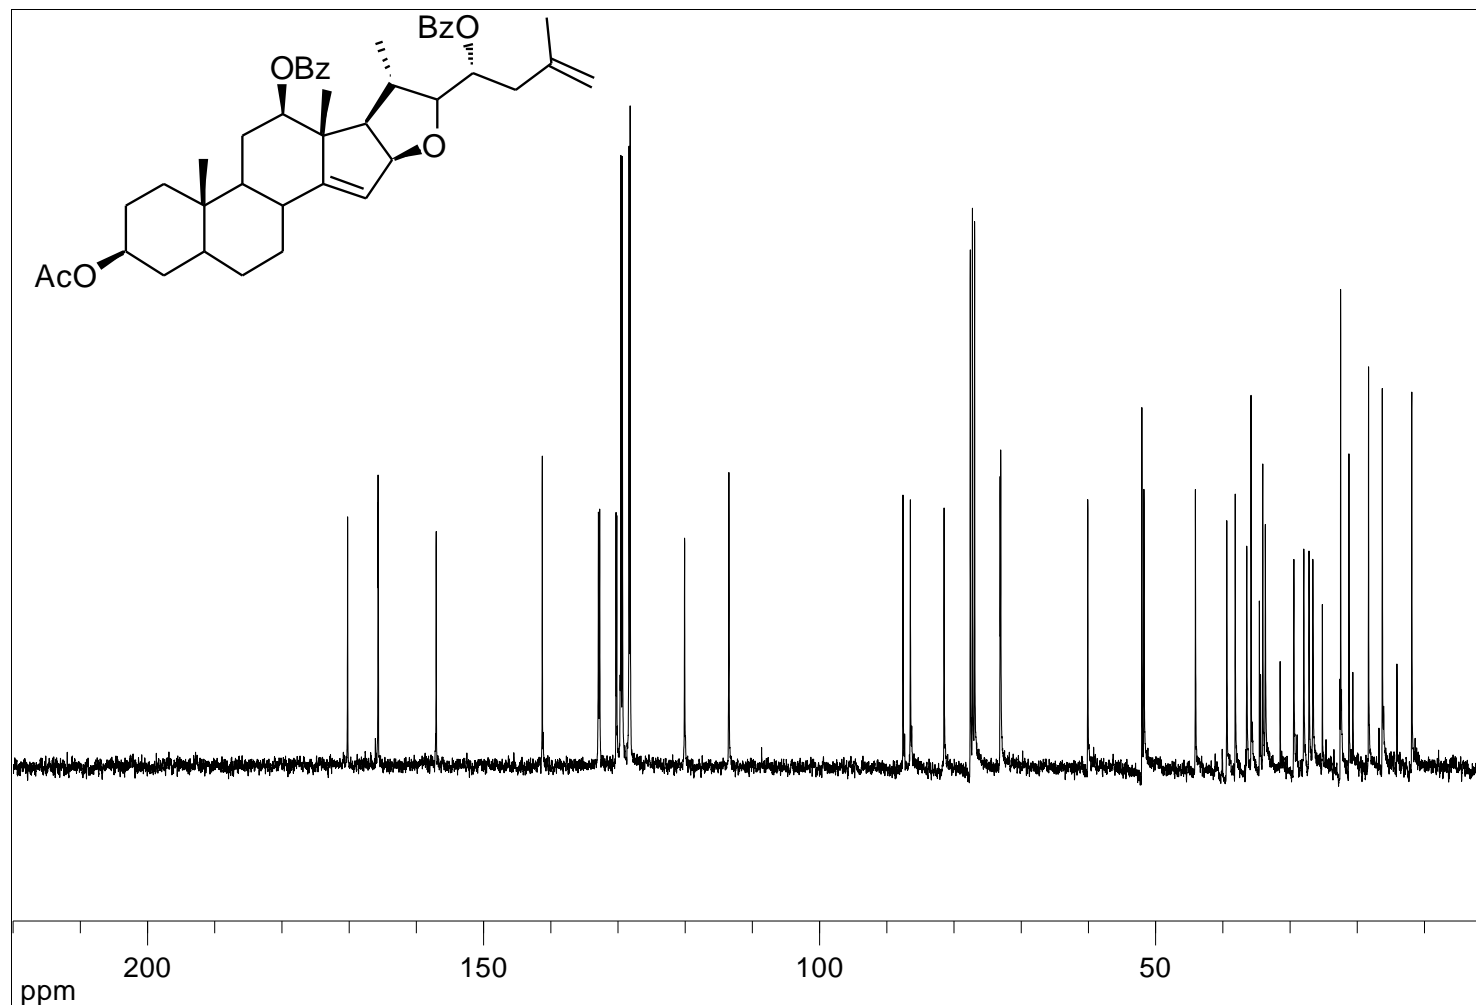 $^{13}\text{C}$  NMR (125 MHz,  $\text{CDCl}_3$ ) of compound 14

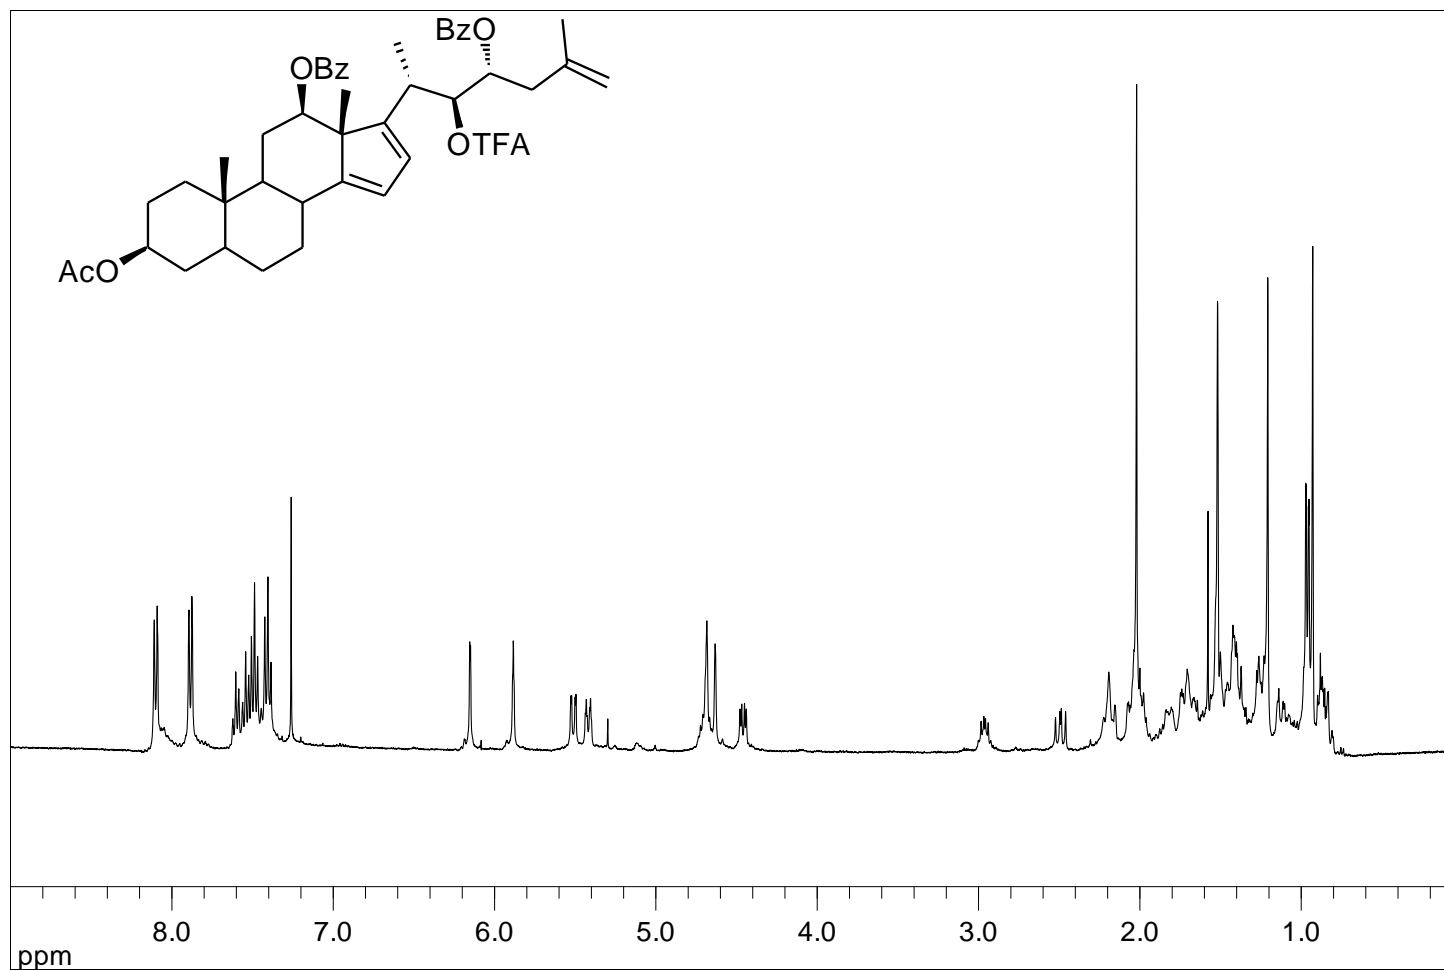

$^1\text{H-NMR}$  (400 MHz,  $\text{CDCl}_3$ ) of compound 15

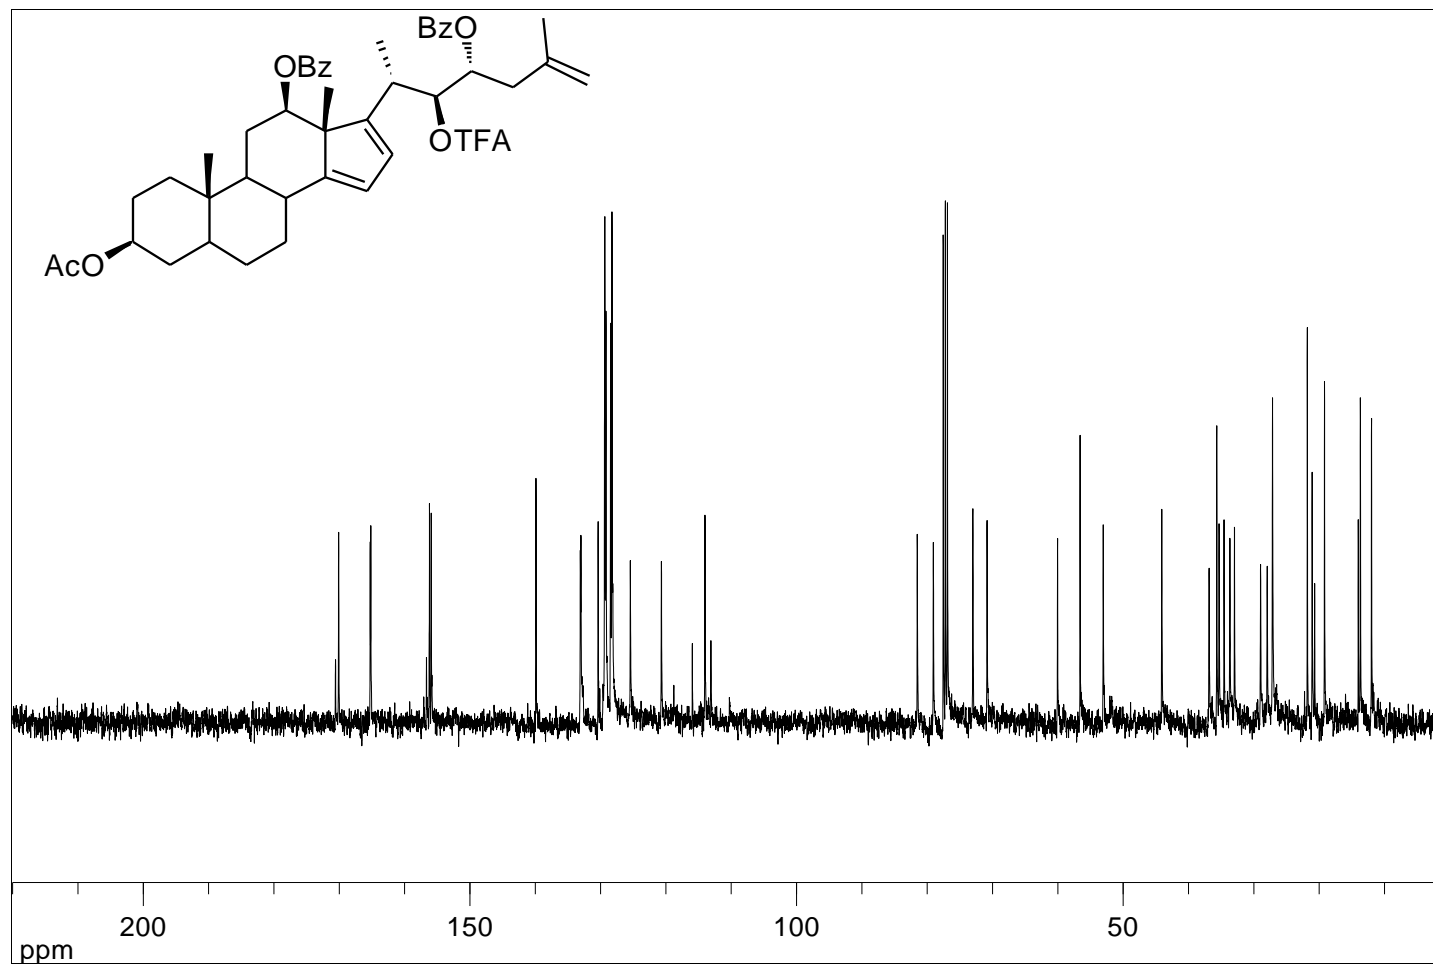

$^{13}\text{C}$  NMR (125 MHz,  $\text{CDCl}_3$ ) of compound 15

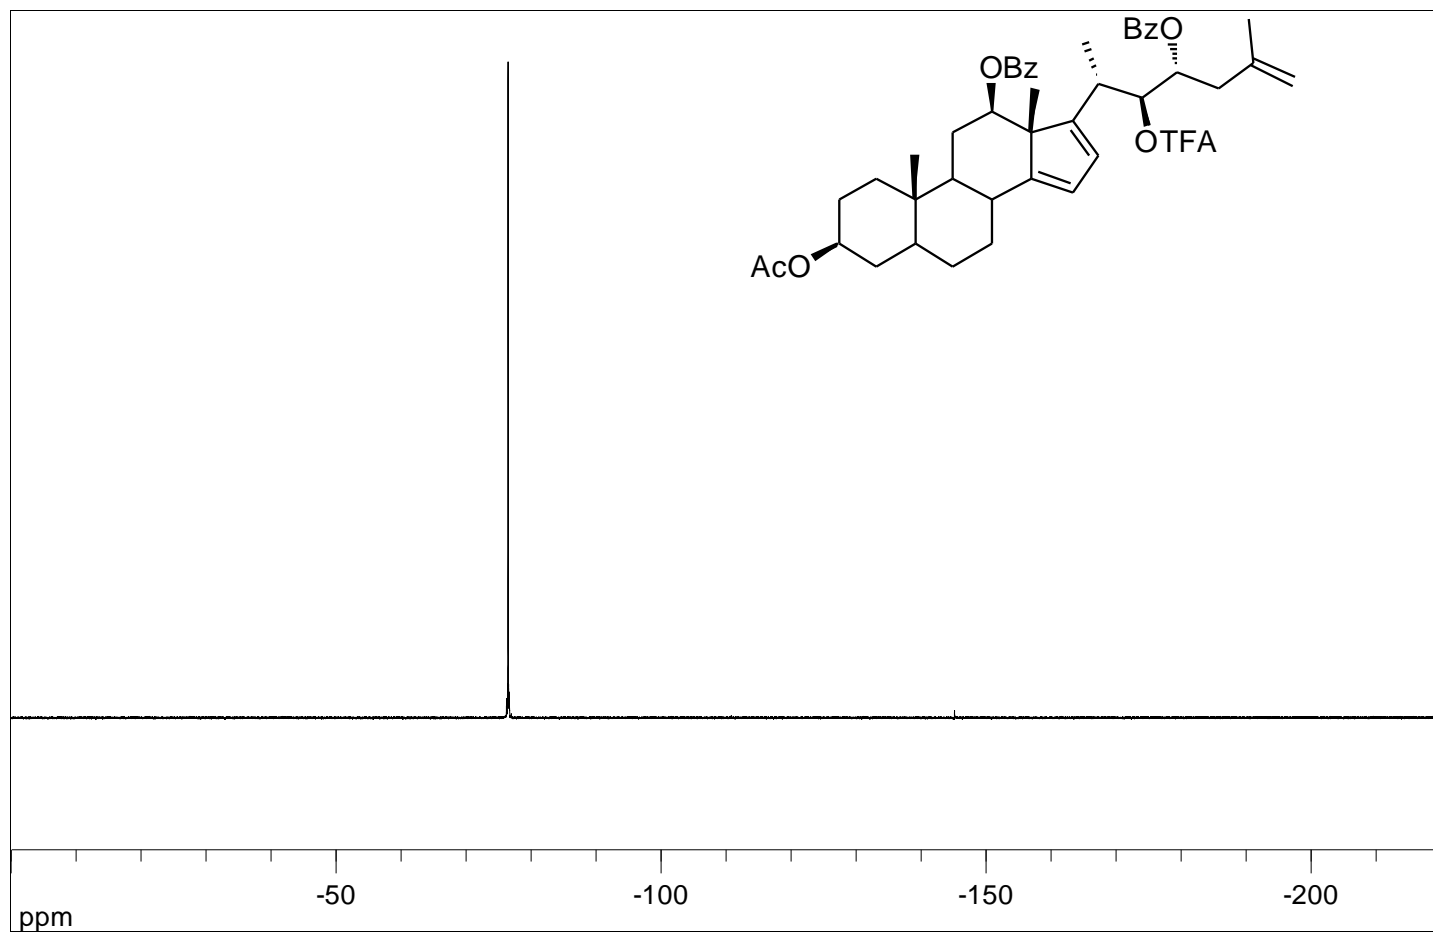

$^{19}\text{F}$  NMR (376.49 MHz,  $\text{CDCl}_3$ ) of compound 15

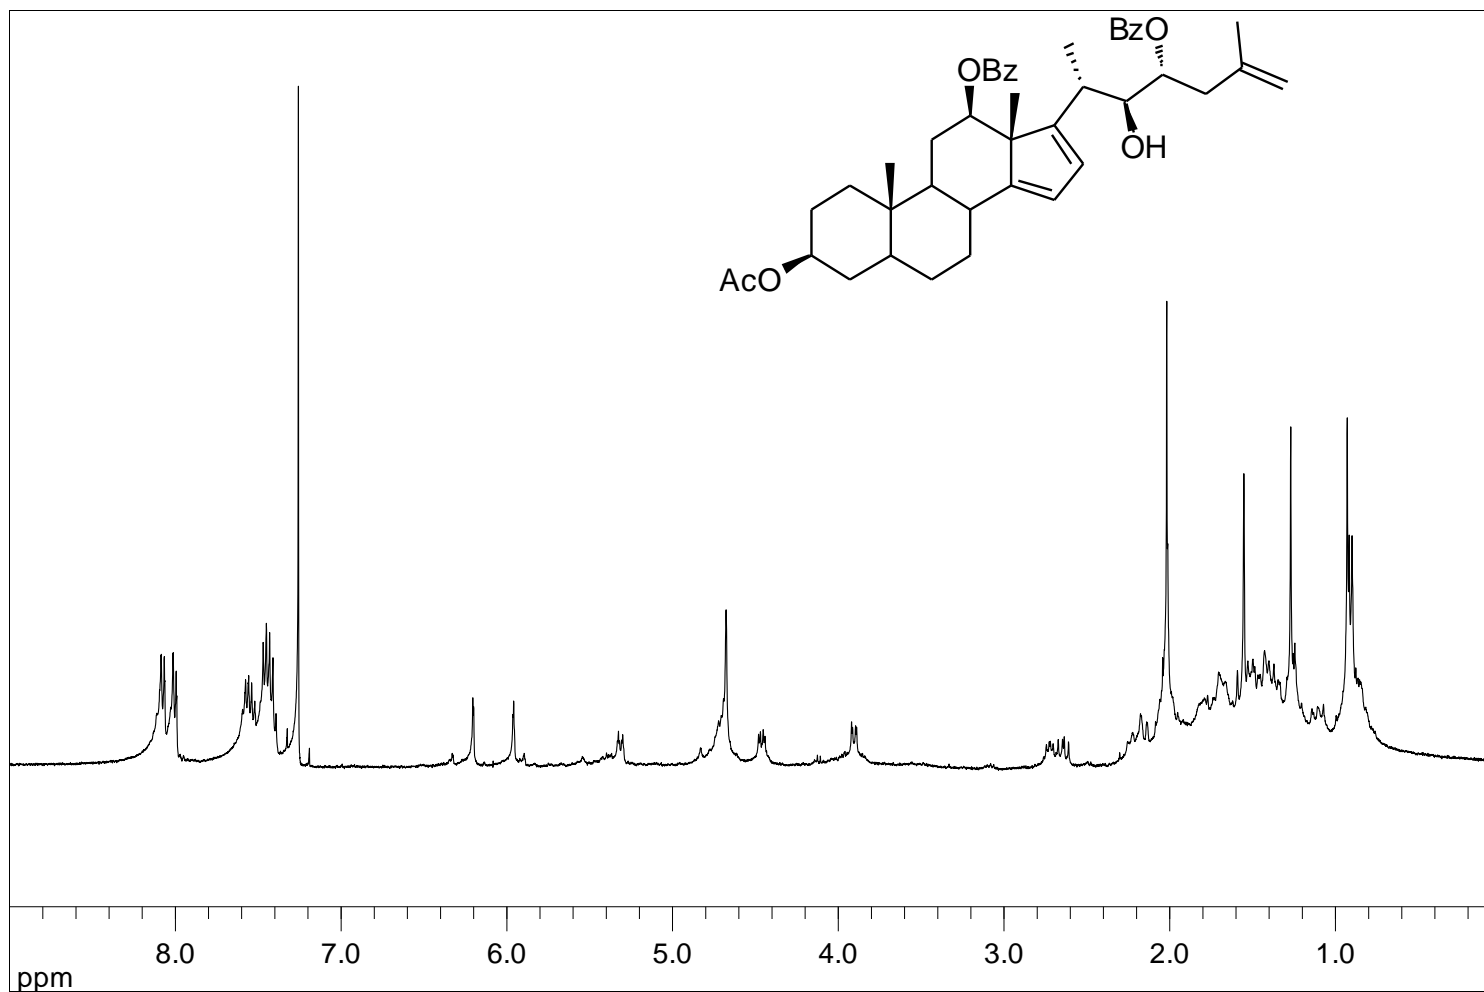

$^1\text{H-NMR}$  (400 MHz,  $\text{CDCl}_3$ ) of compound 16



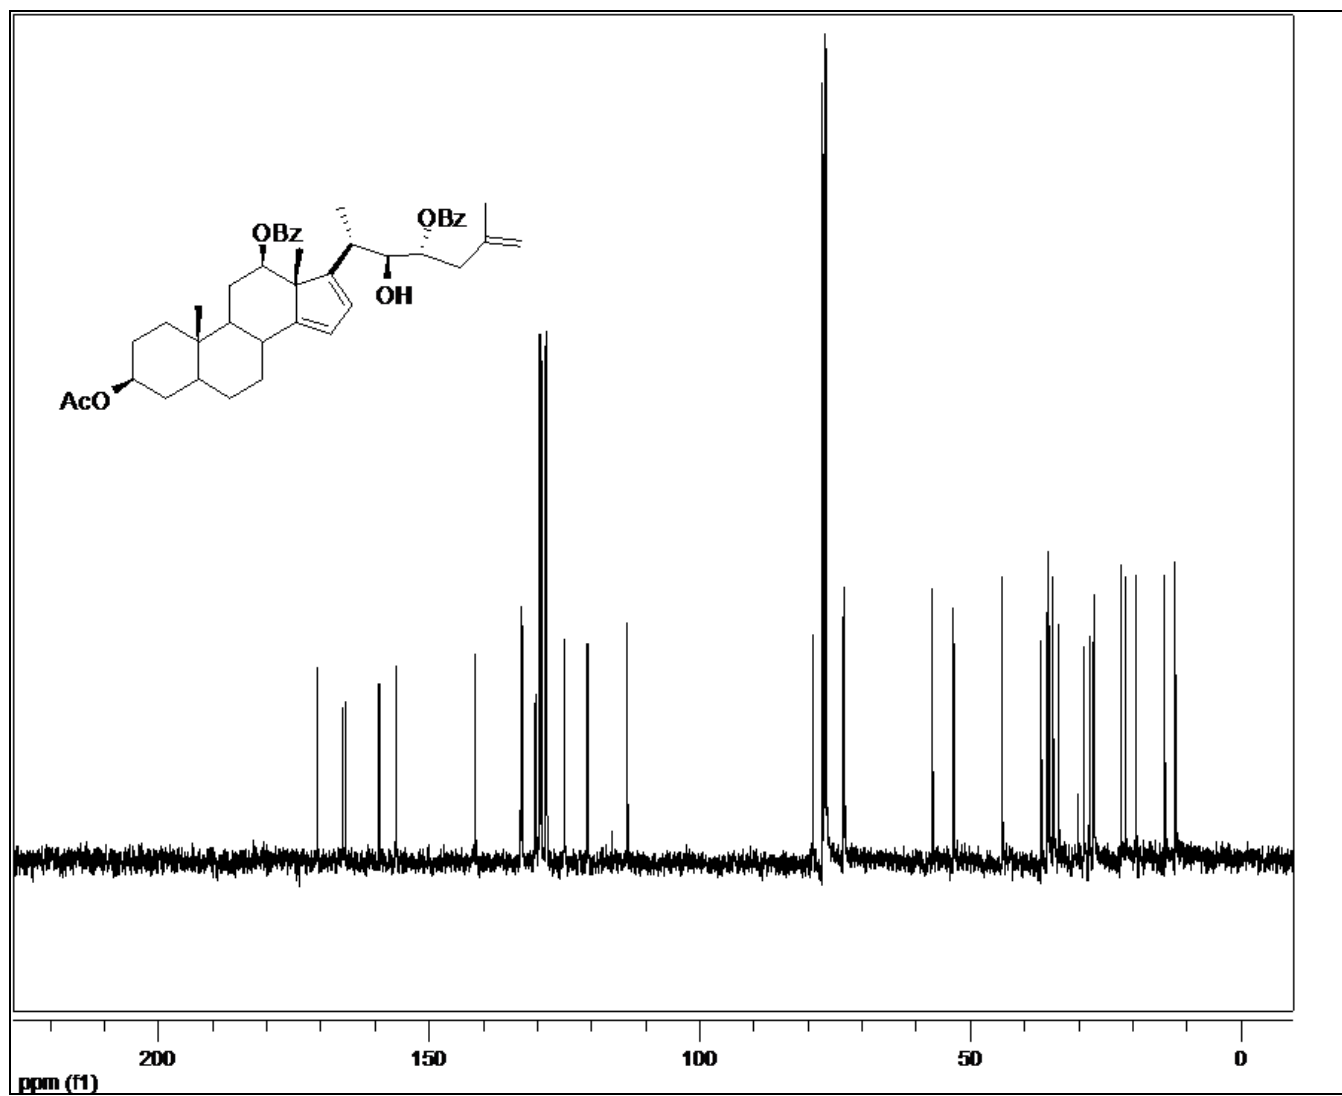 $^{13}\text{C}$  NMR (100 MHz,  $\text{CDCl}_3$ ) of compound 16

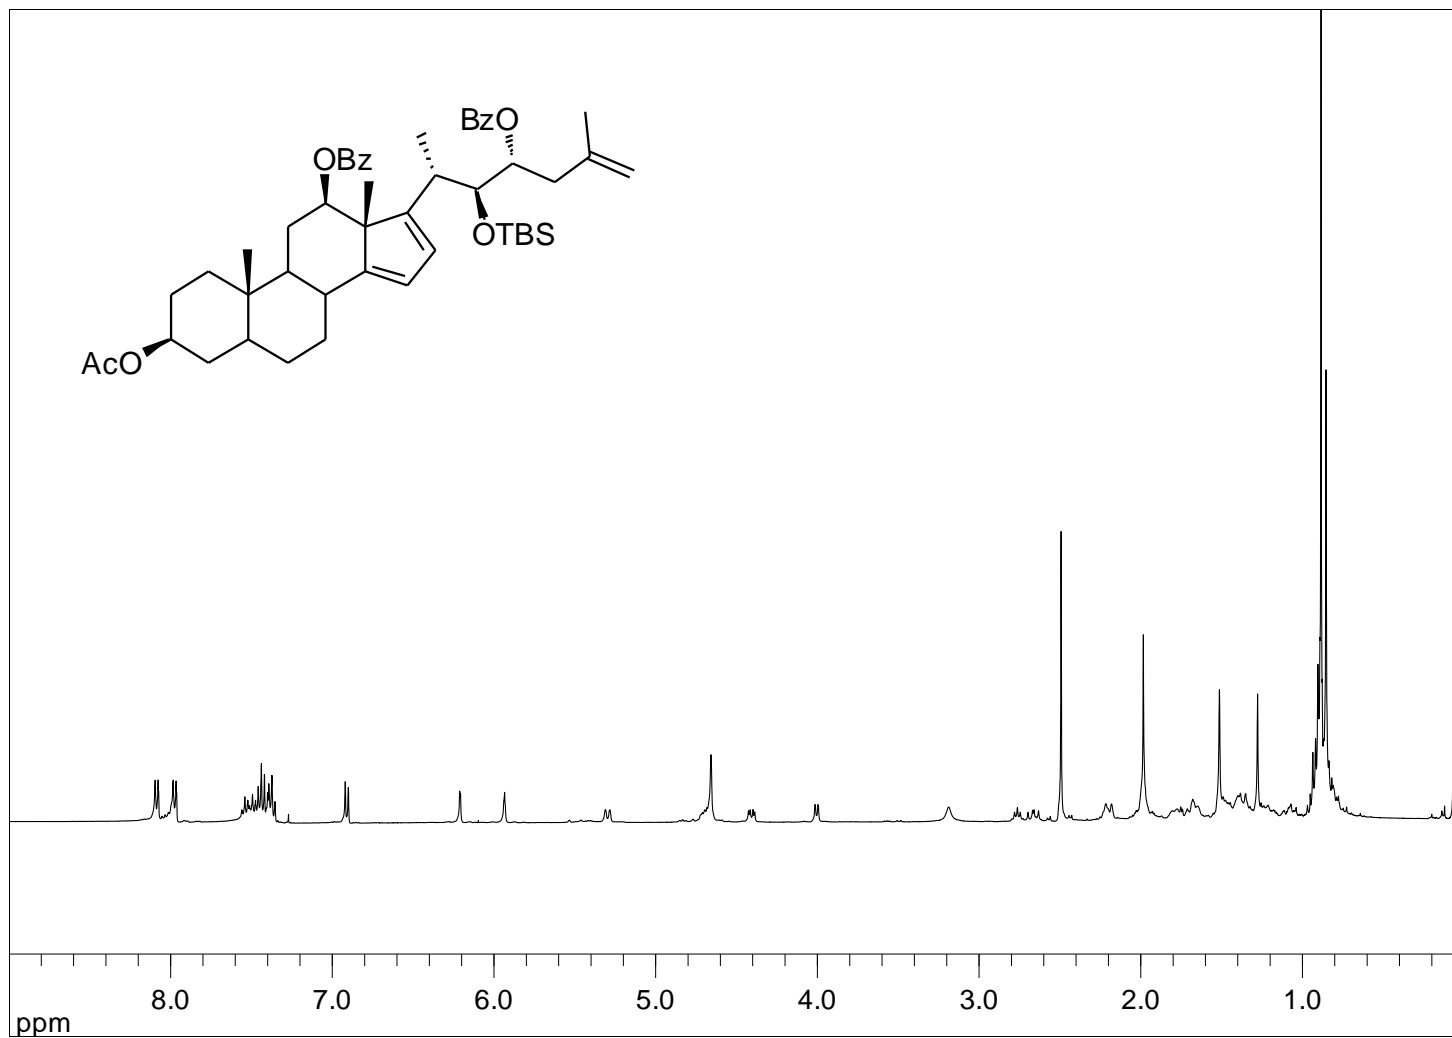

**<sup>1</sup>H-NMR (400 MHz, CDCl<sub>3</sub>) of compound 17**

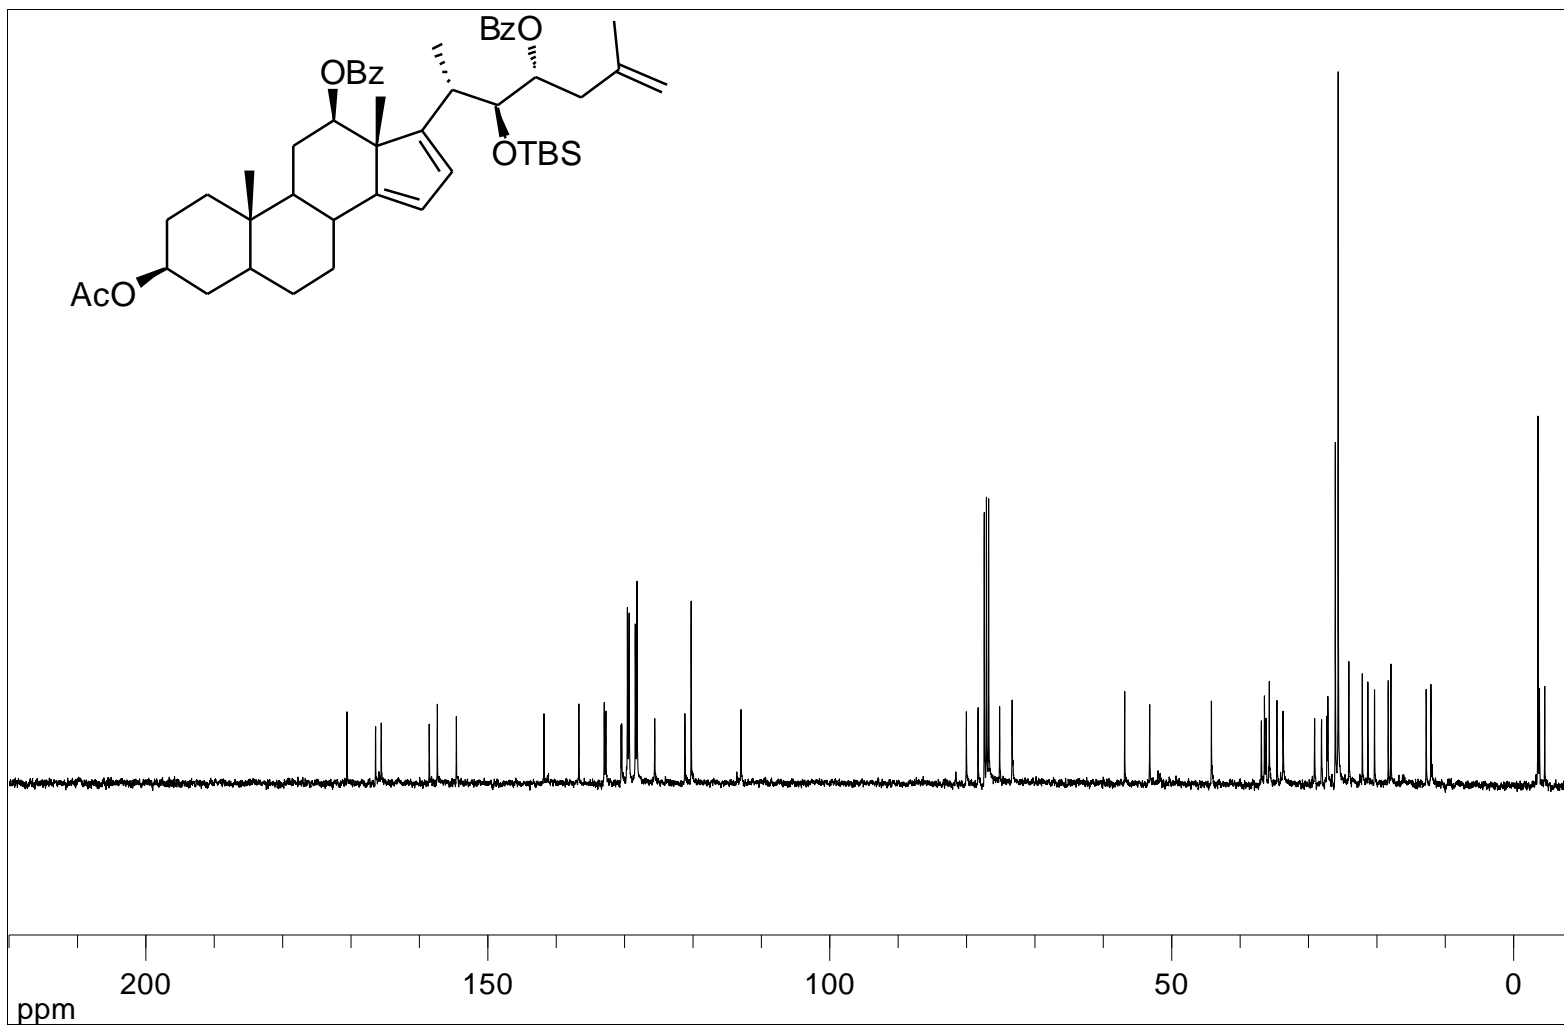 $^{13}\text{C}$  NMR (125 MHz,  $\text{CDCl}_3$ ) of compound 17

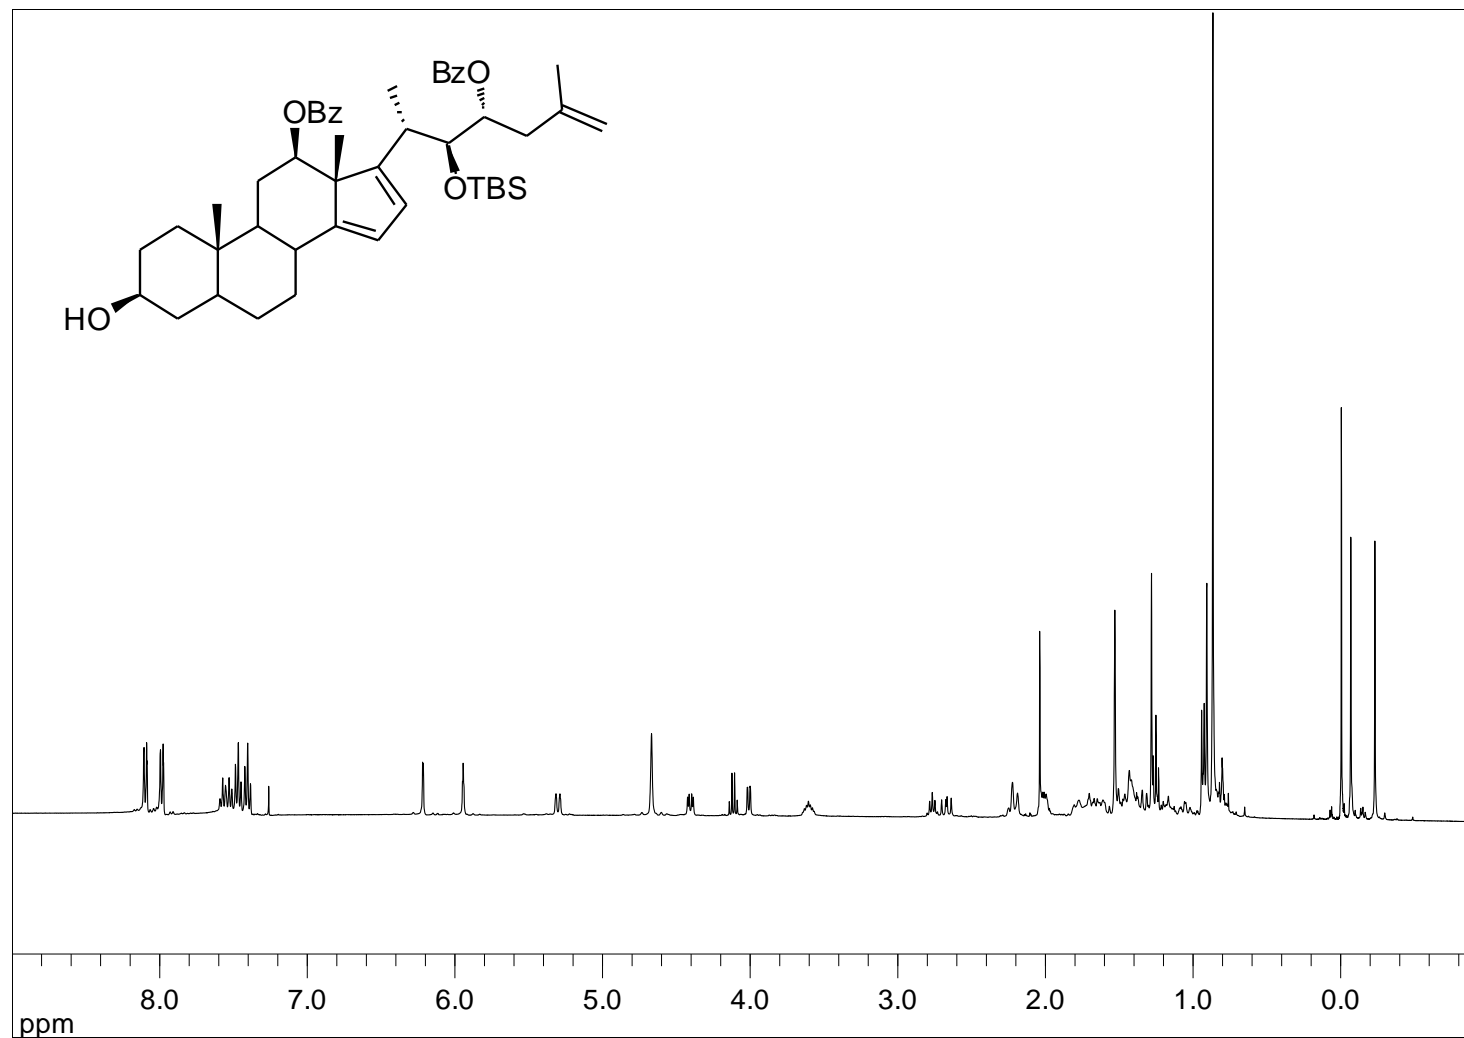

**<sup>1</sup>H-NMR (400 MHz, CDCl<sub>3</sub>) of compound 18**

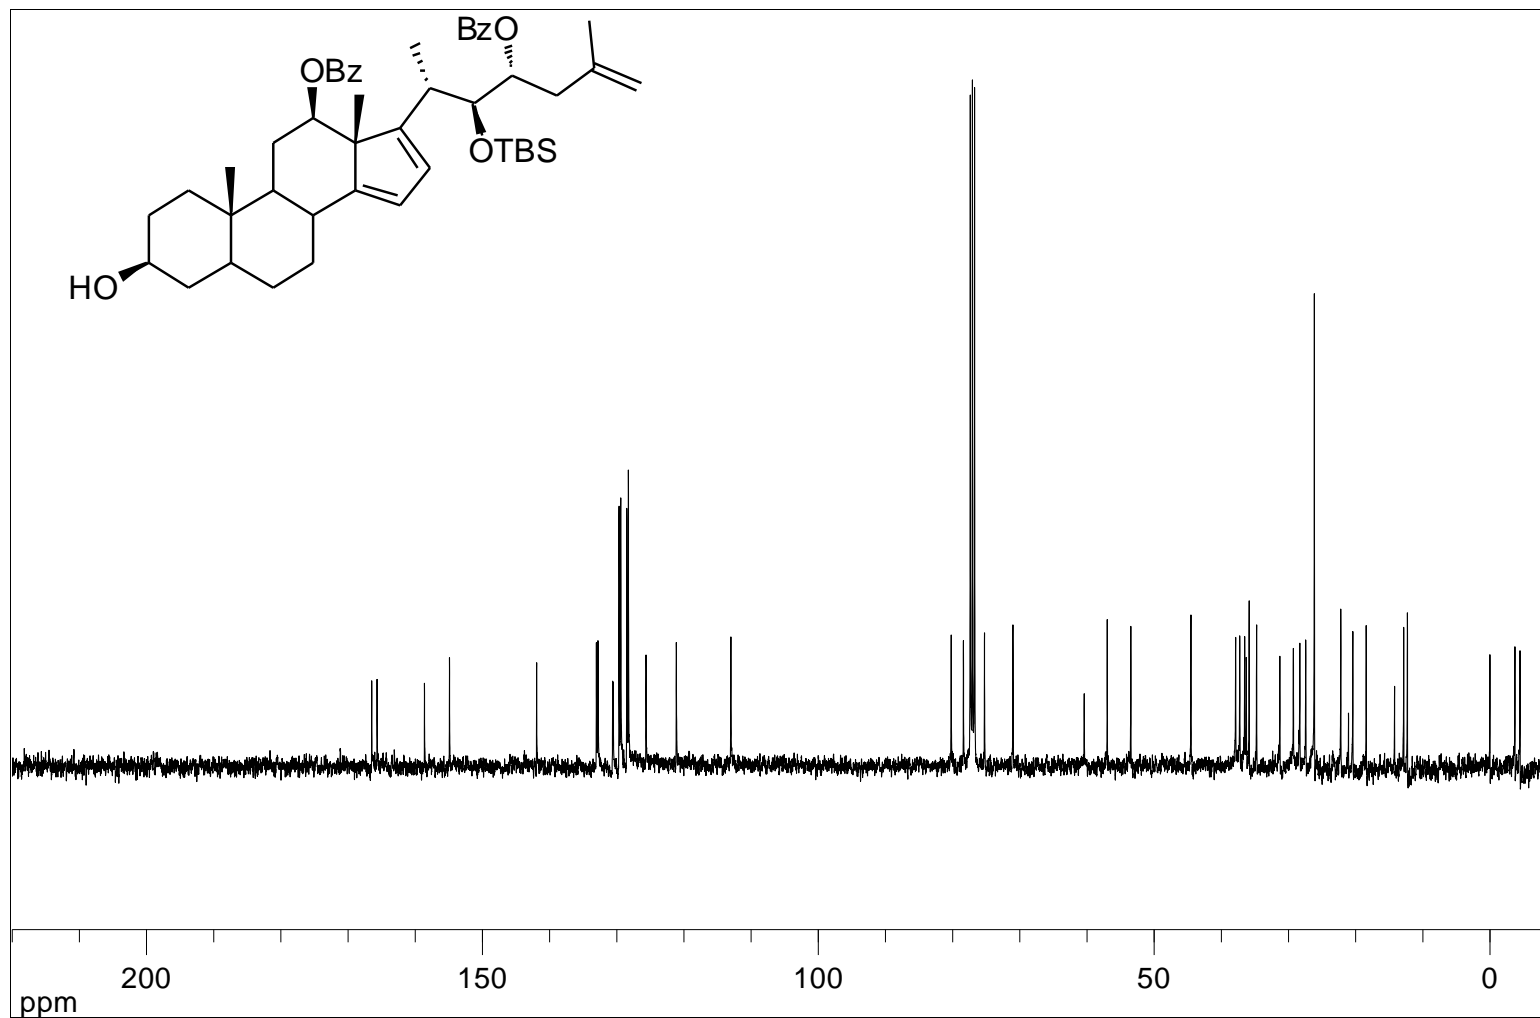 $^{13}\text{C}$  NMR (125 MHz,  $\text{CDCl}_3$ ) of compound 18

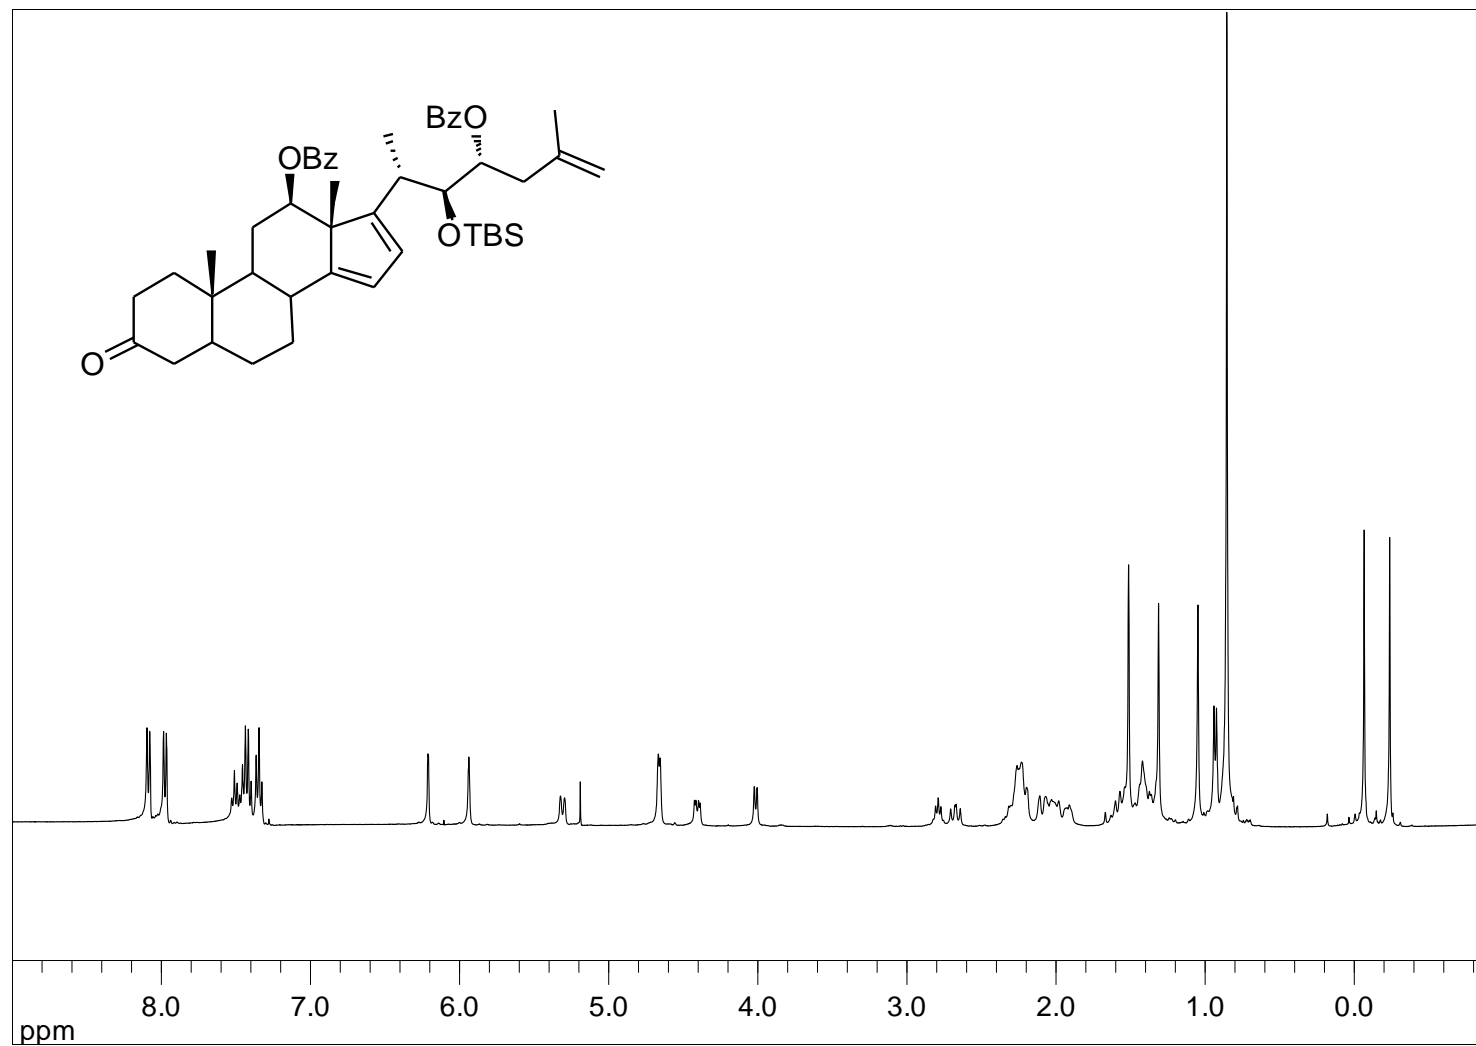

**<sup>1</sup>H-NMR (400 MHz, CDCl<sub>3</sub>) of compound 19**

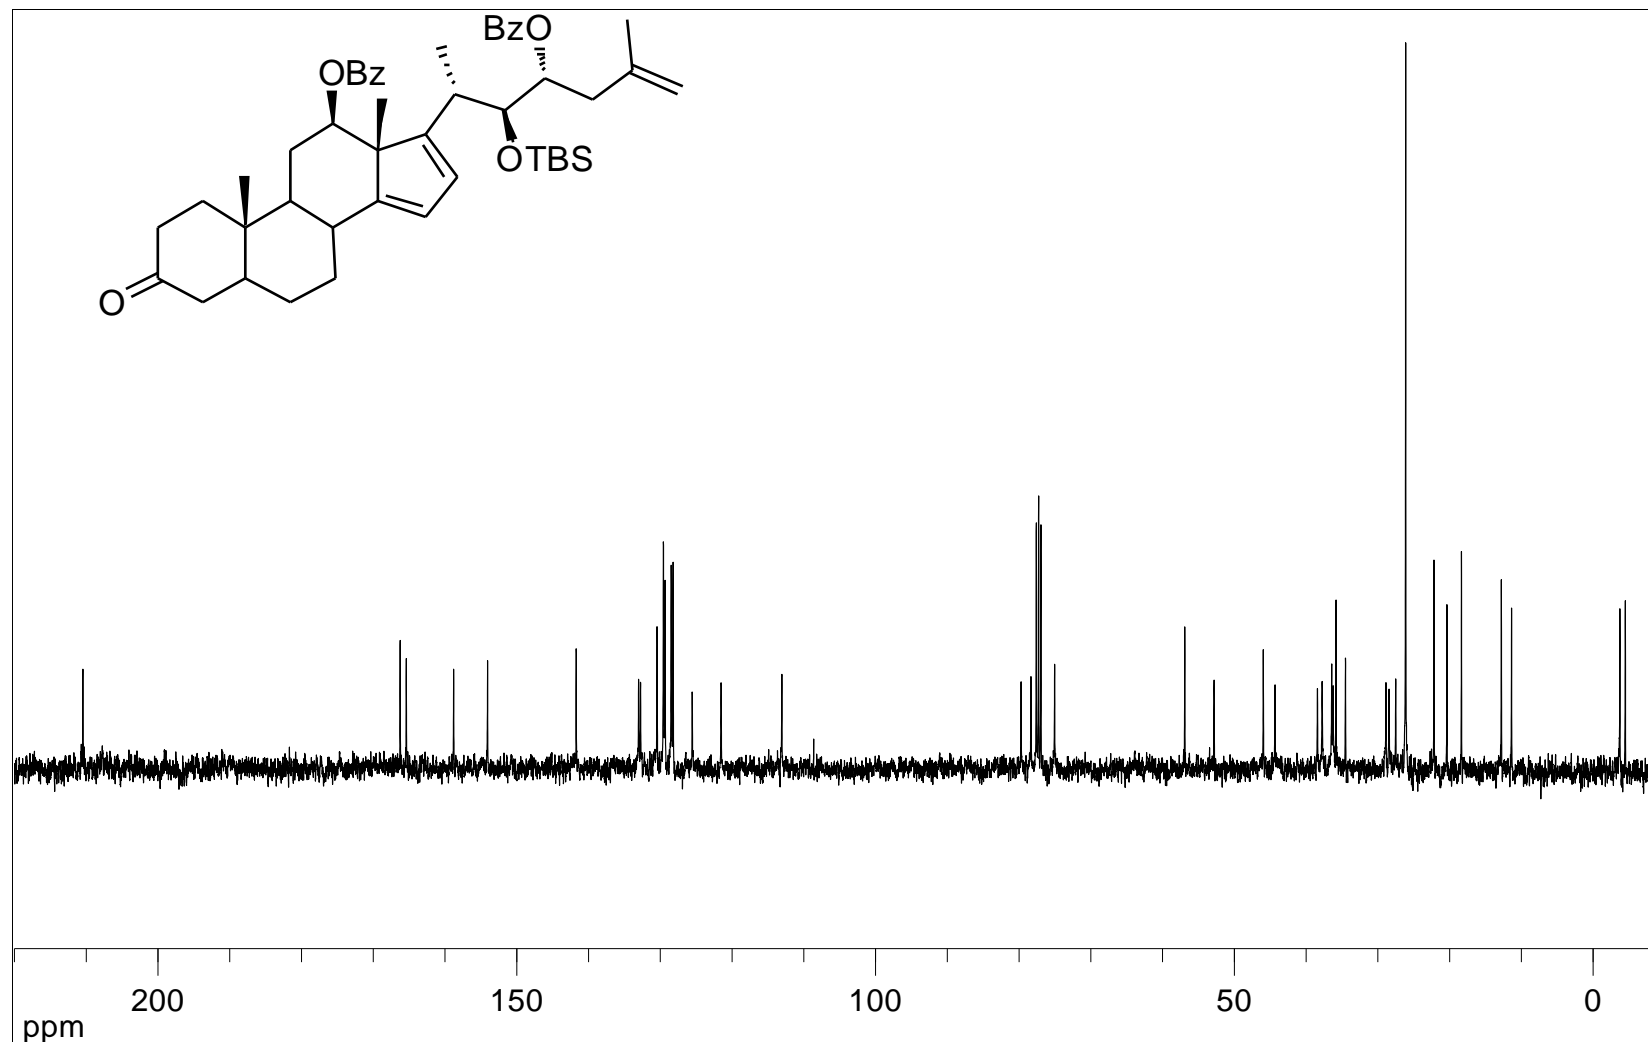 $^{13}\text{C}$  NMR (125 MHz,  $\text{CDCl}_3$ ) of compound 19

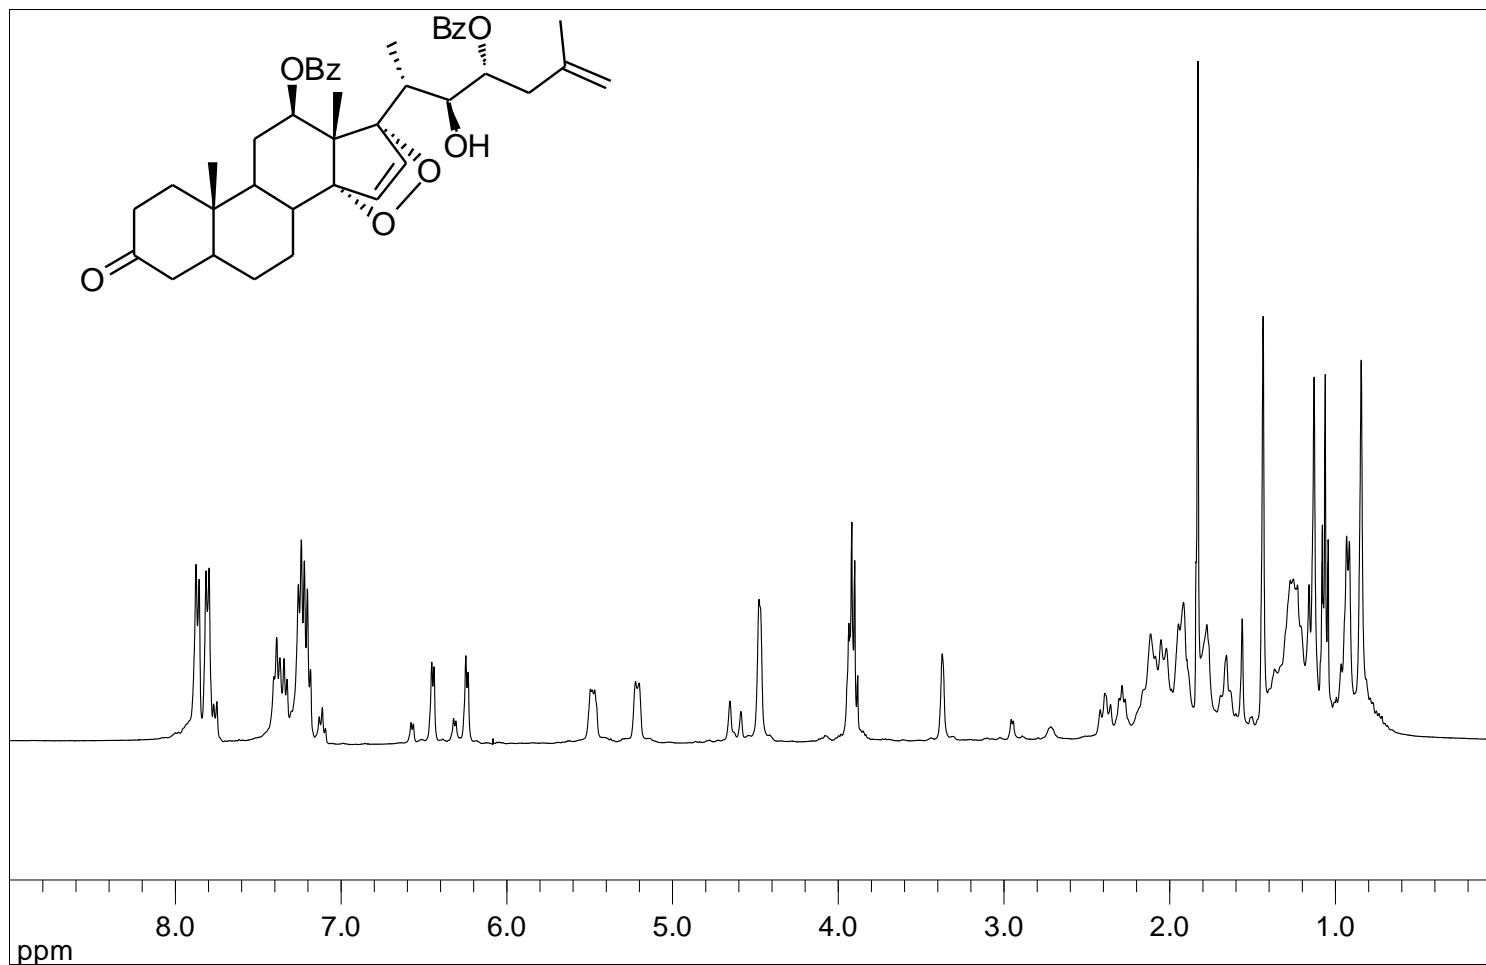

**<sup>1</sup>H-NMR (400 MHz, CDCl<sub>3</sub>) of compound 21**



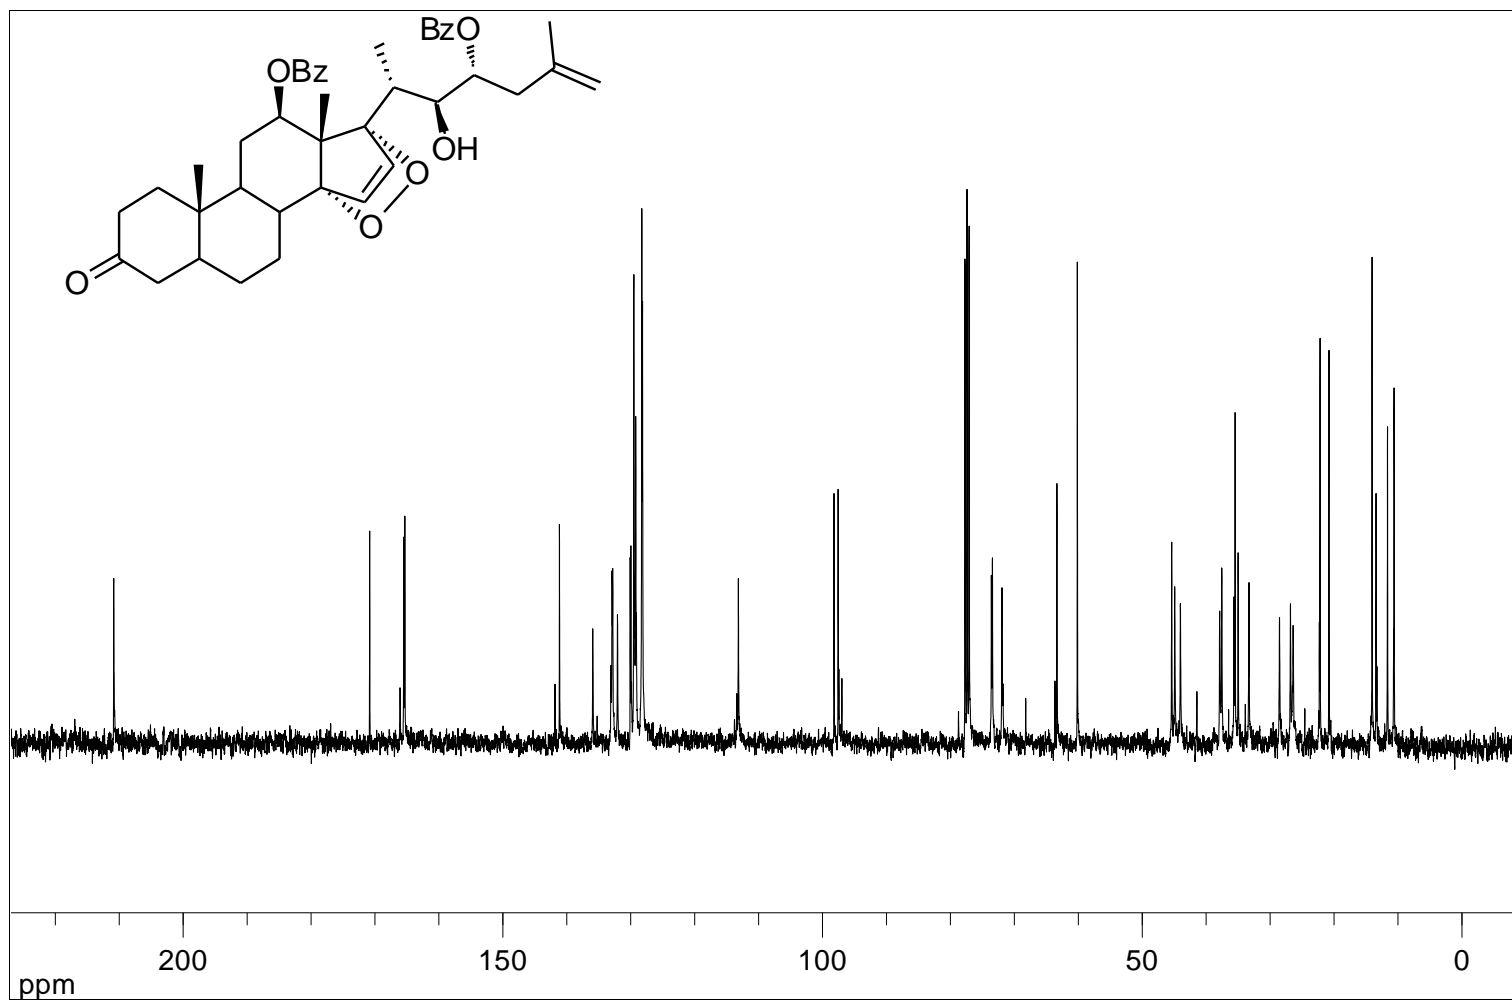

$^{13}\text{C}$  NMR (125 MHz,  $\text{CDCl}_3$ ) of compound 21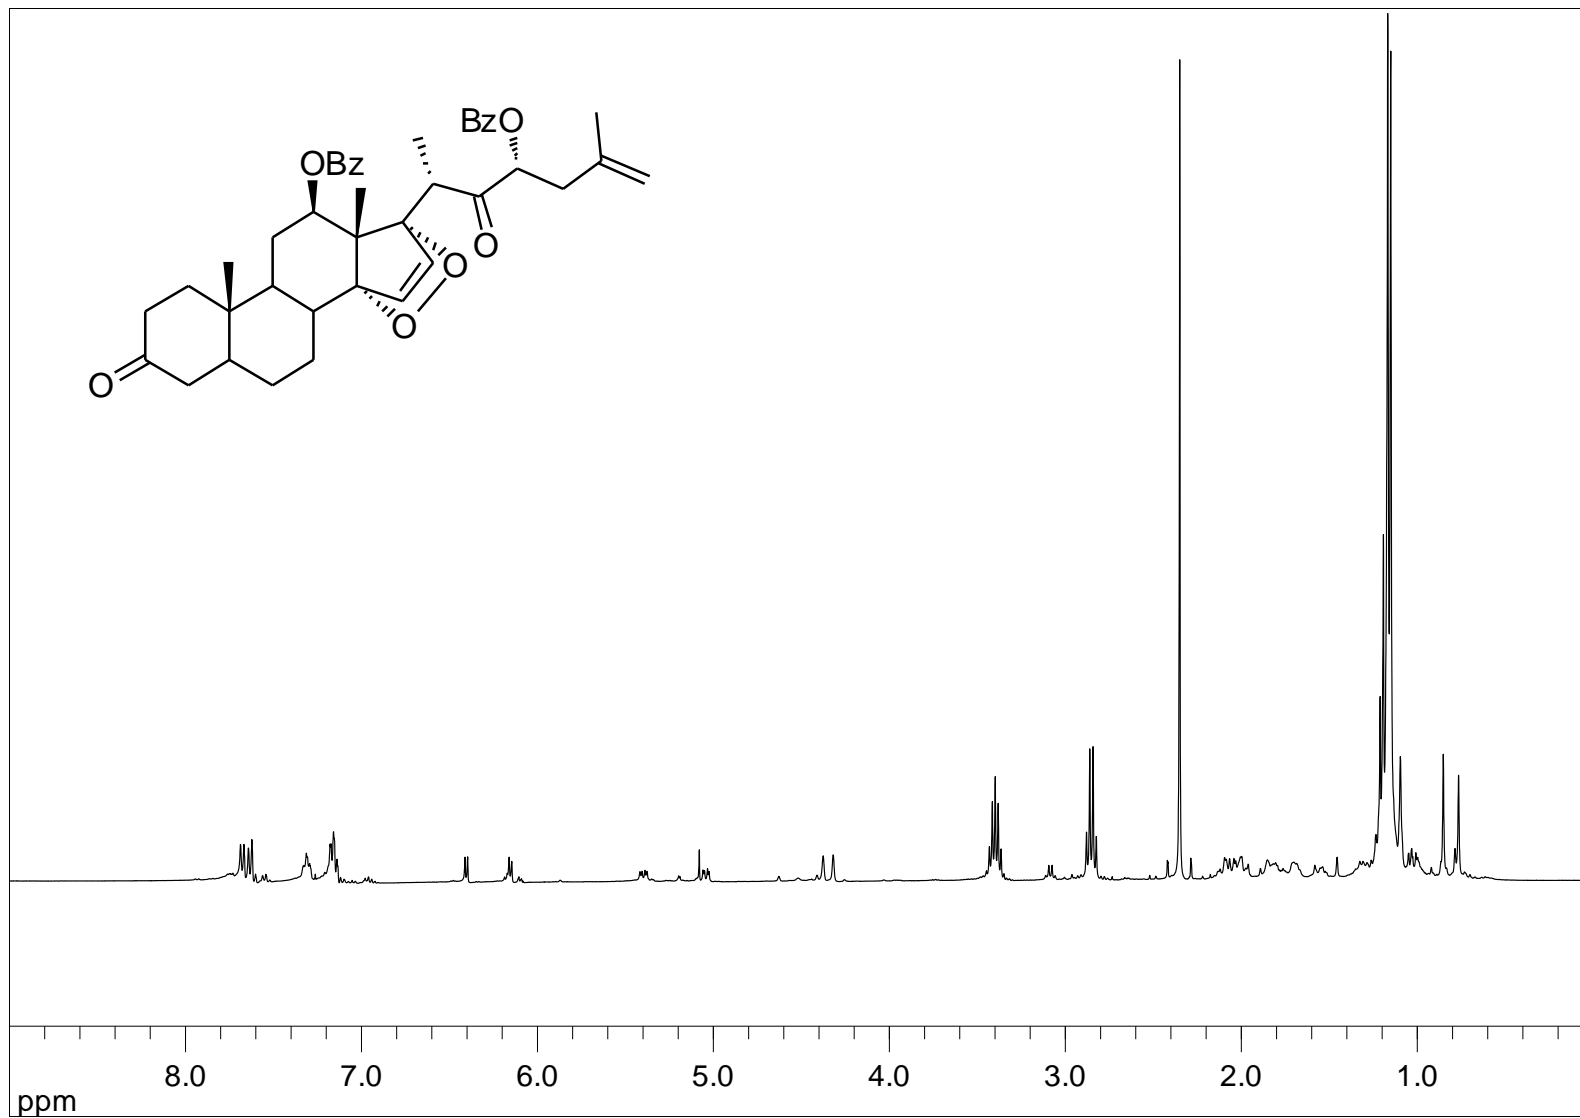

$^1\text{H-NMR}$  (400 MHz,  $\text{CDCl}_3$ ) of compound 22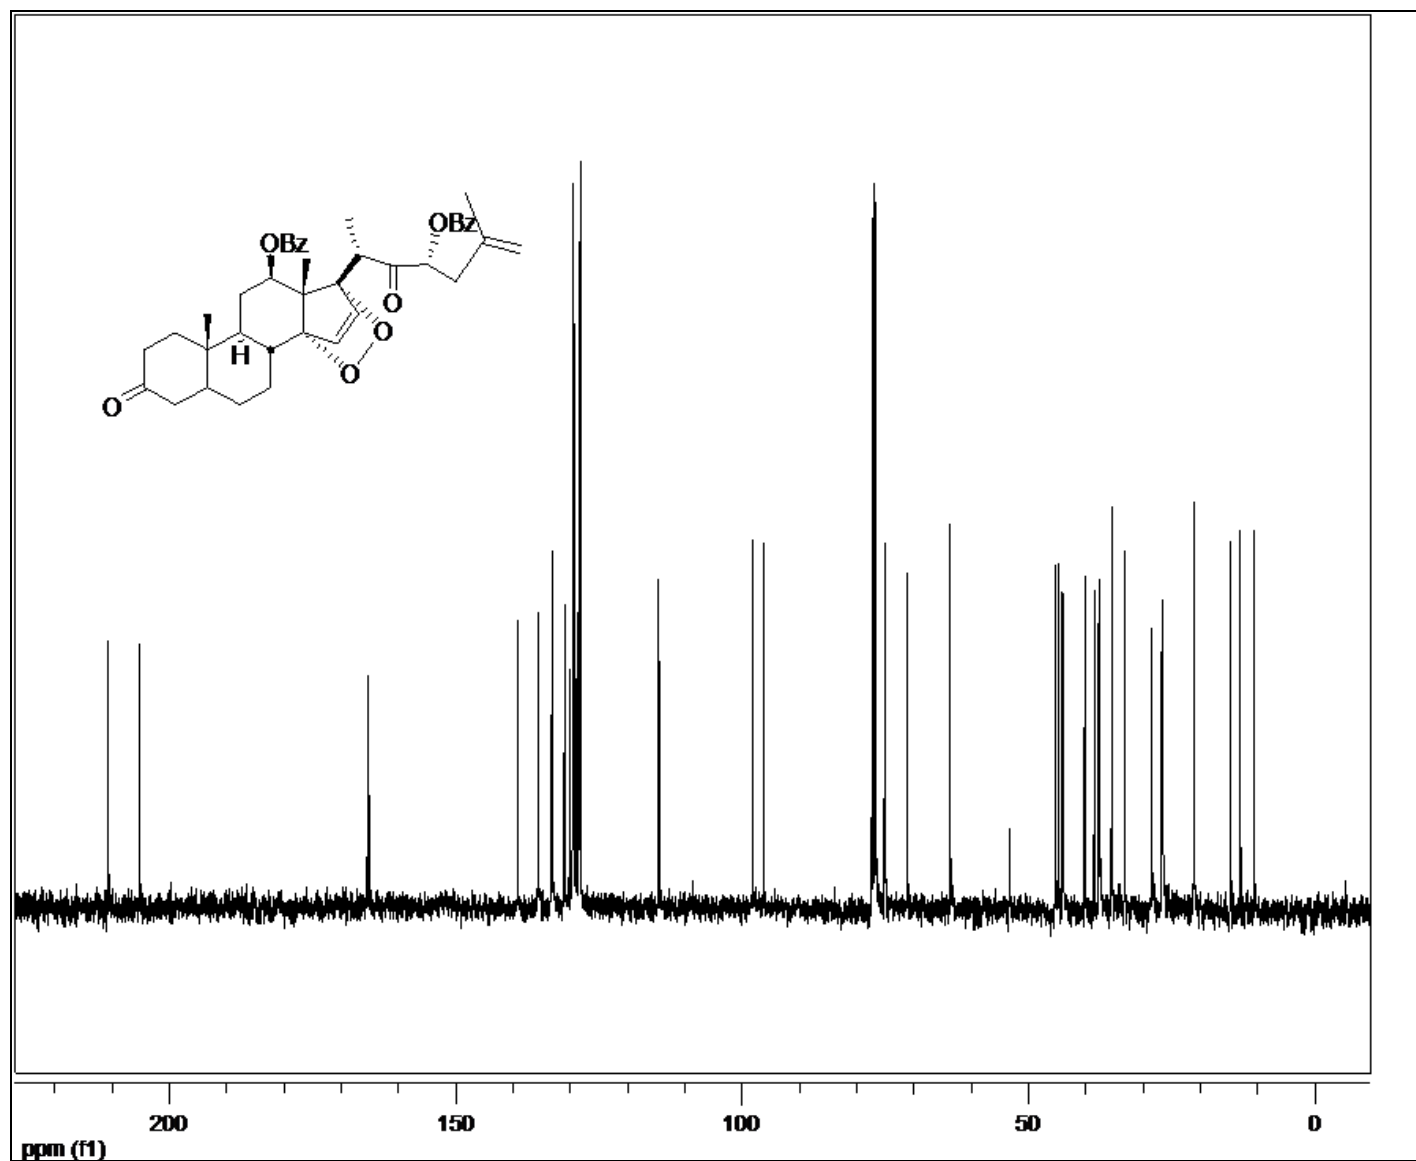

**$^{13}\text{C}$  NMR (125 MHz,  $\text{CDCl}_3$ ) of compound 22**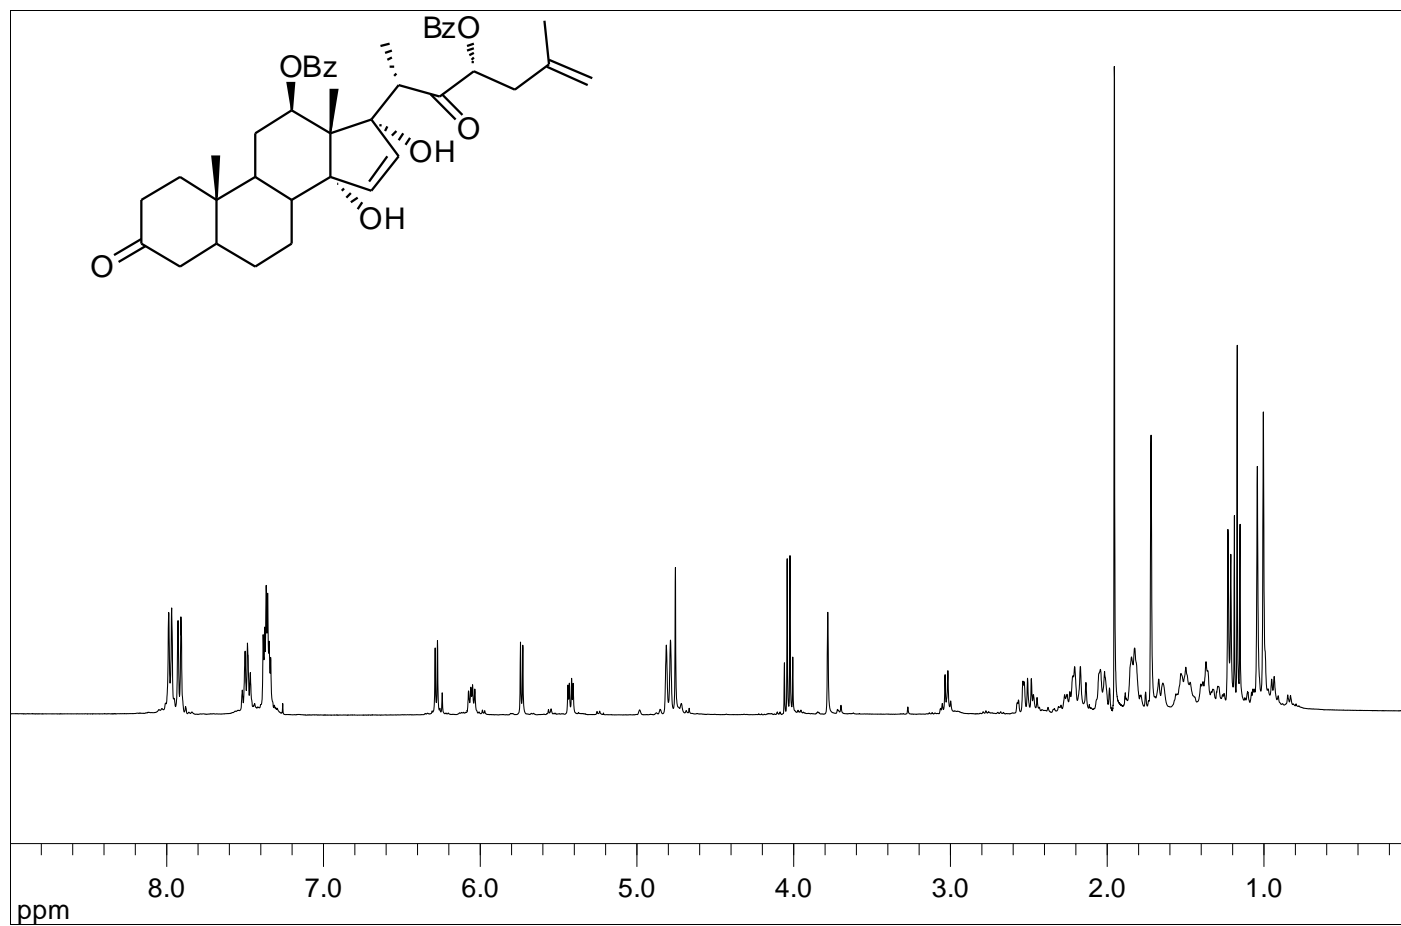

**$^1\text{H-NMR}$  (400 MHz,  $\text{CDCl}_3$ ) of compound 23**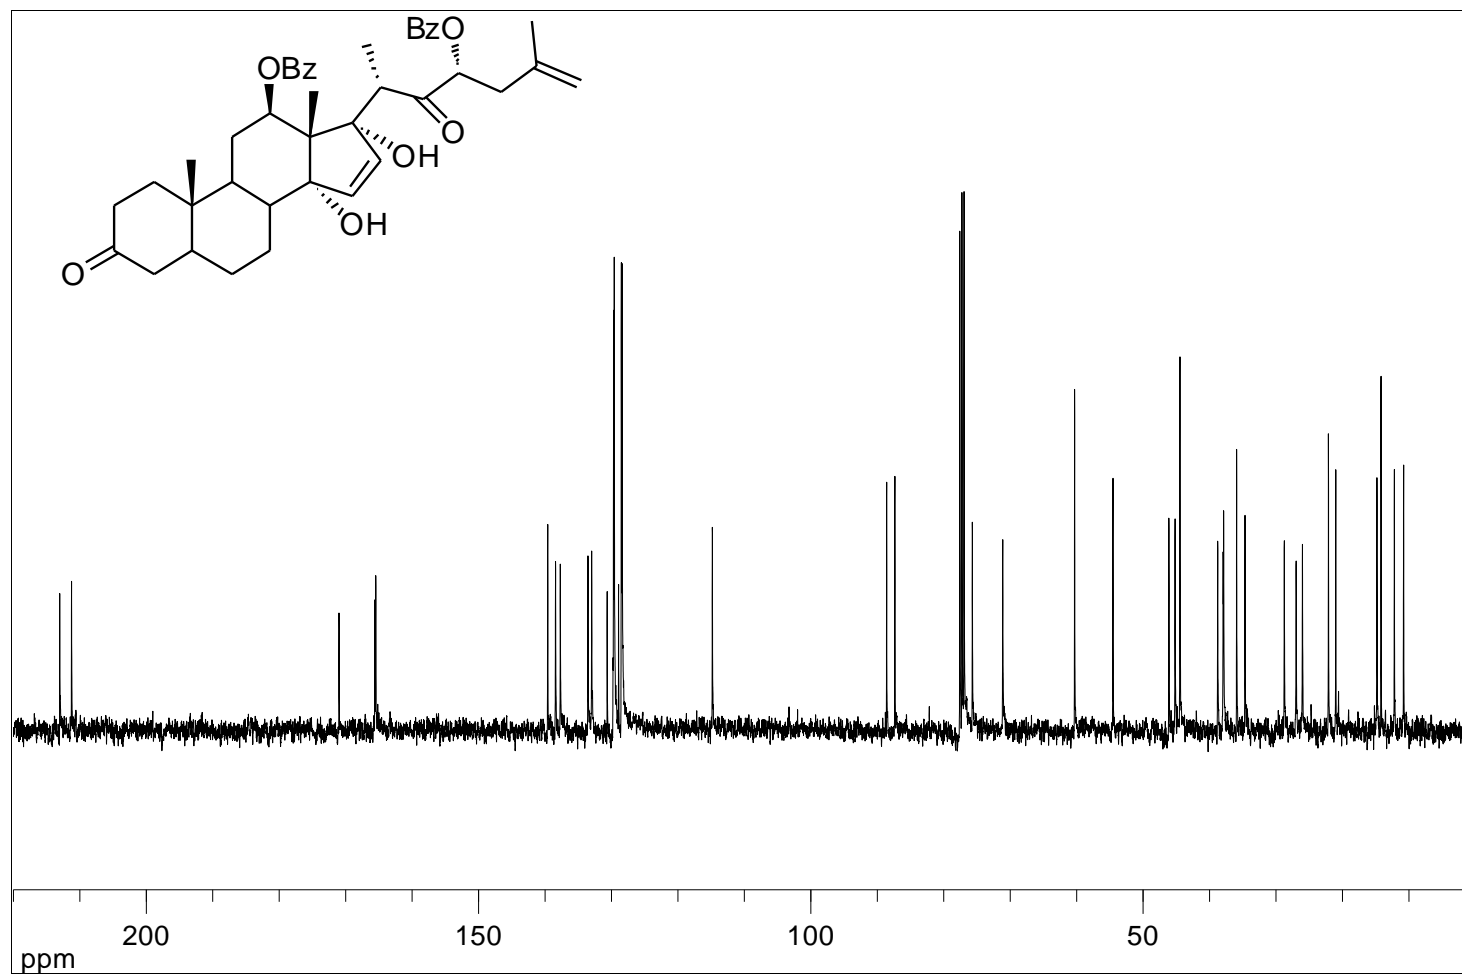

$^{13}\text{C}$  NMR (125 MHz,  $\text{CDCl}_3$ ) of compound 23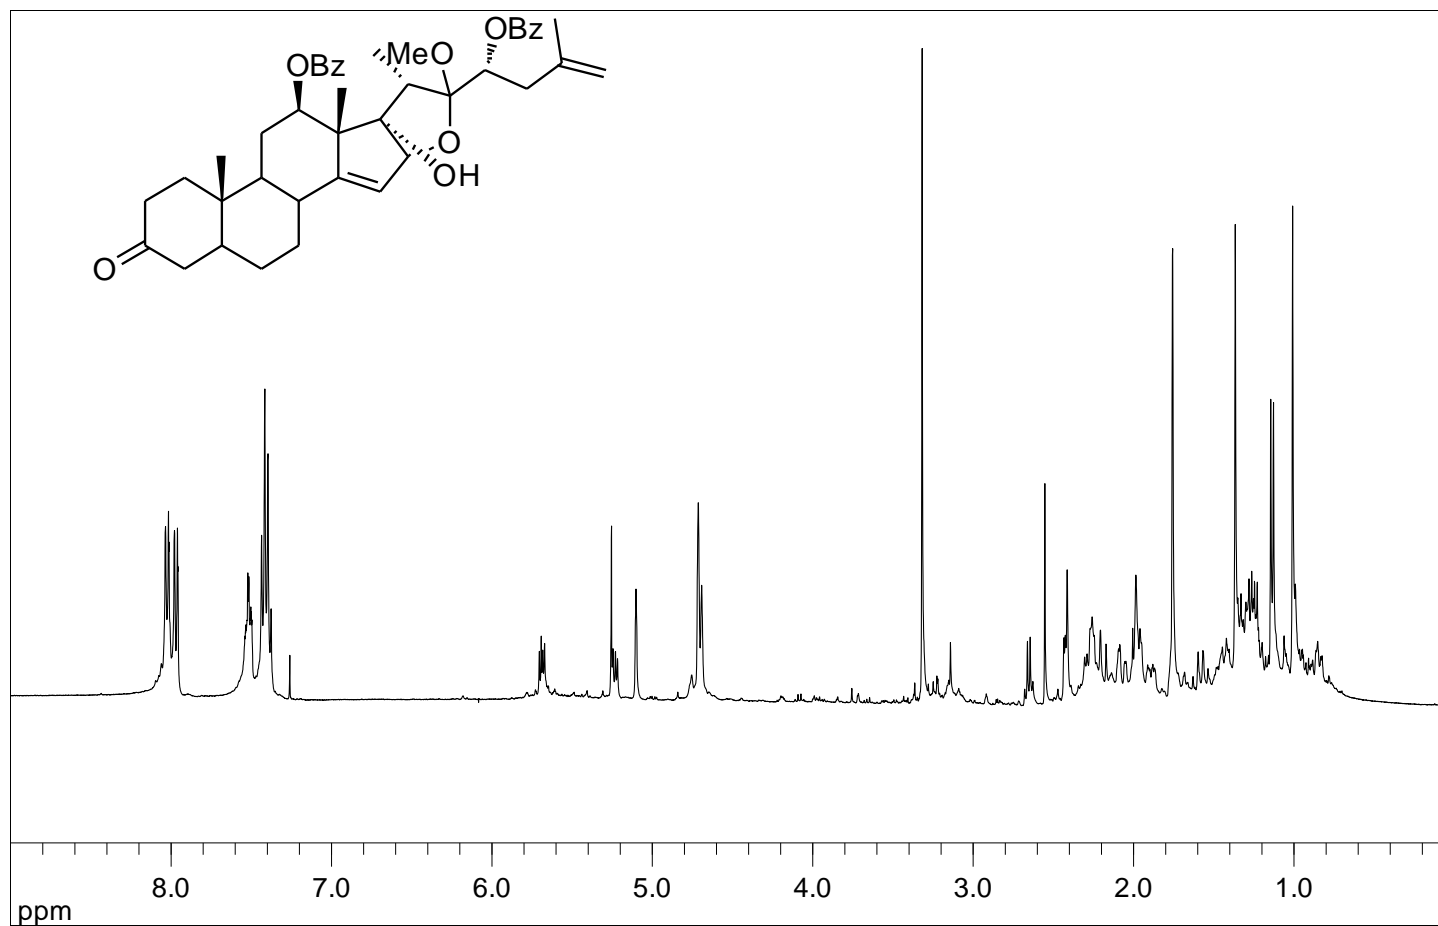

**$^1\text{H-NMR}$  (400 MHz,  $\text{CDCl}_3$ ) of compound 24**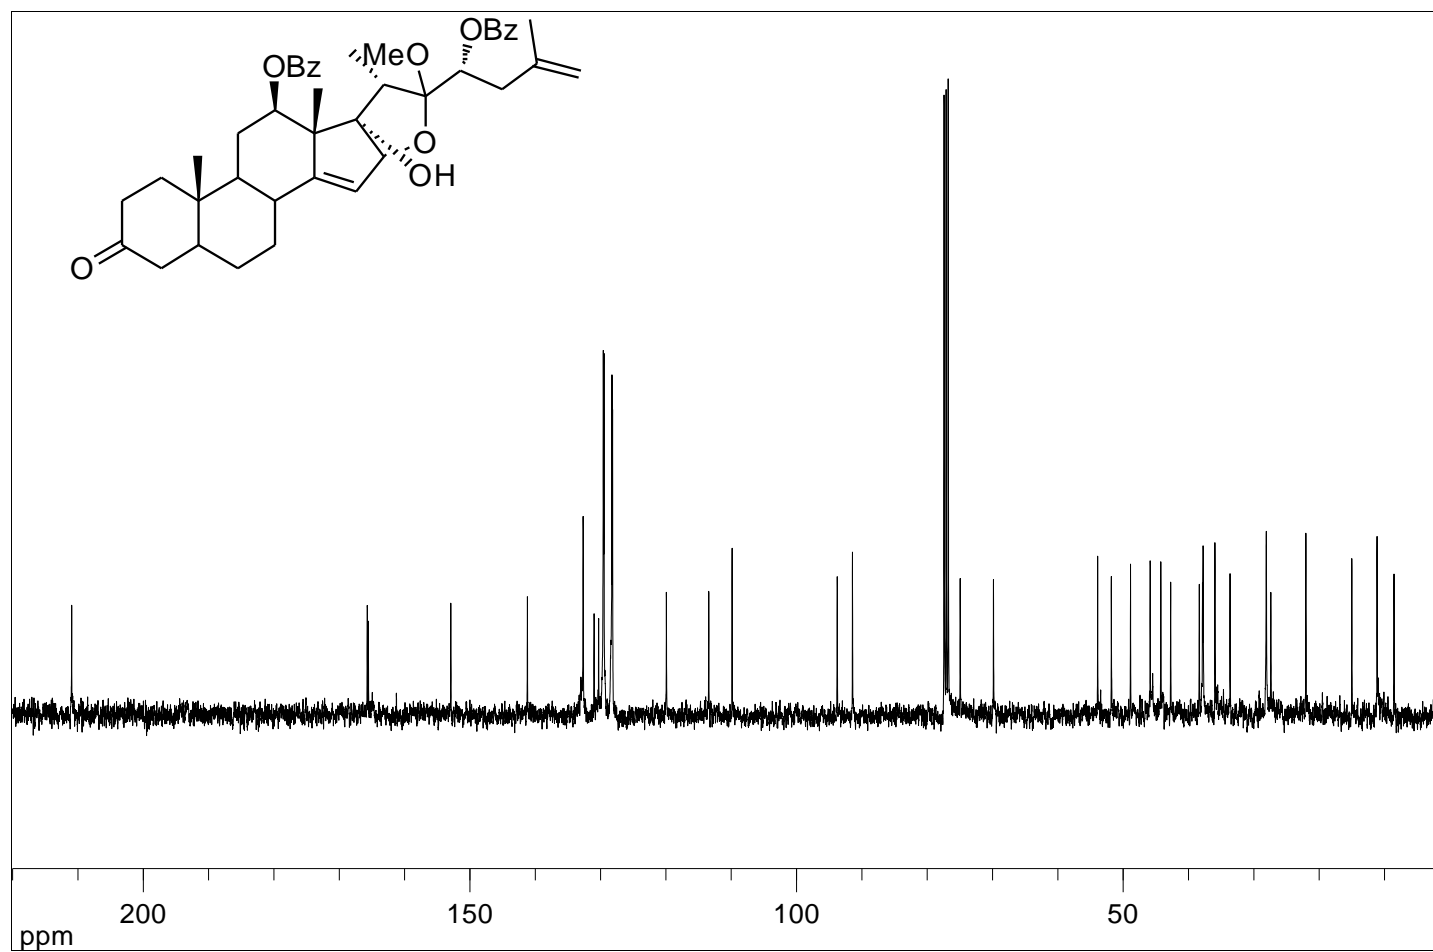

$^{13}\text{C}$  NMR (125 MHz,  $\text{CDCl}_3$ ) of compound 24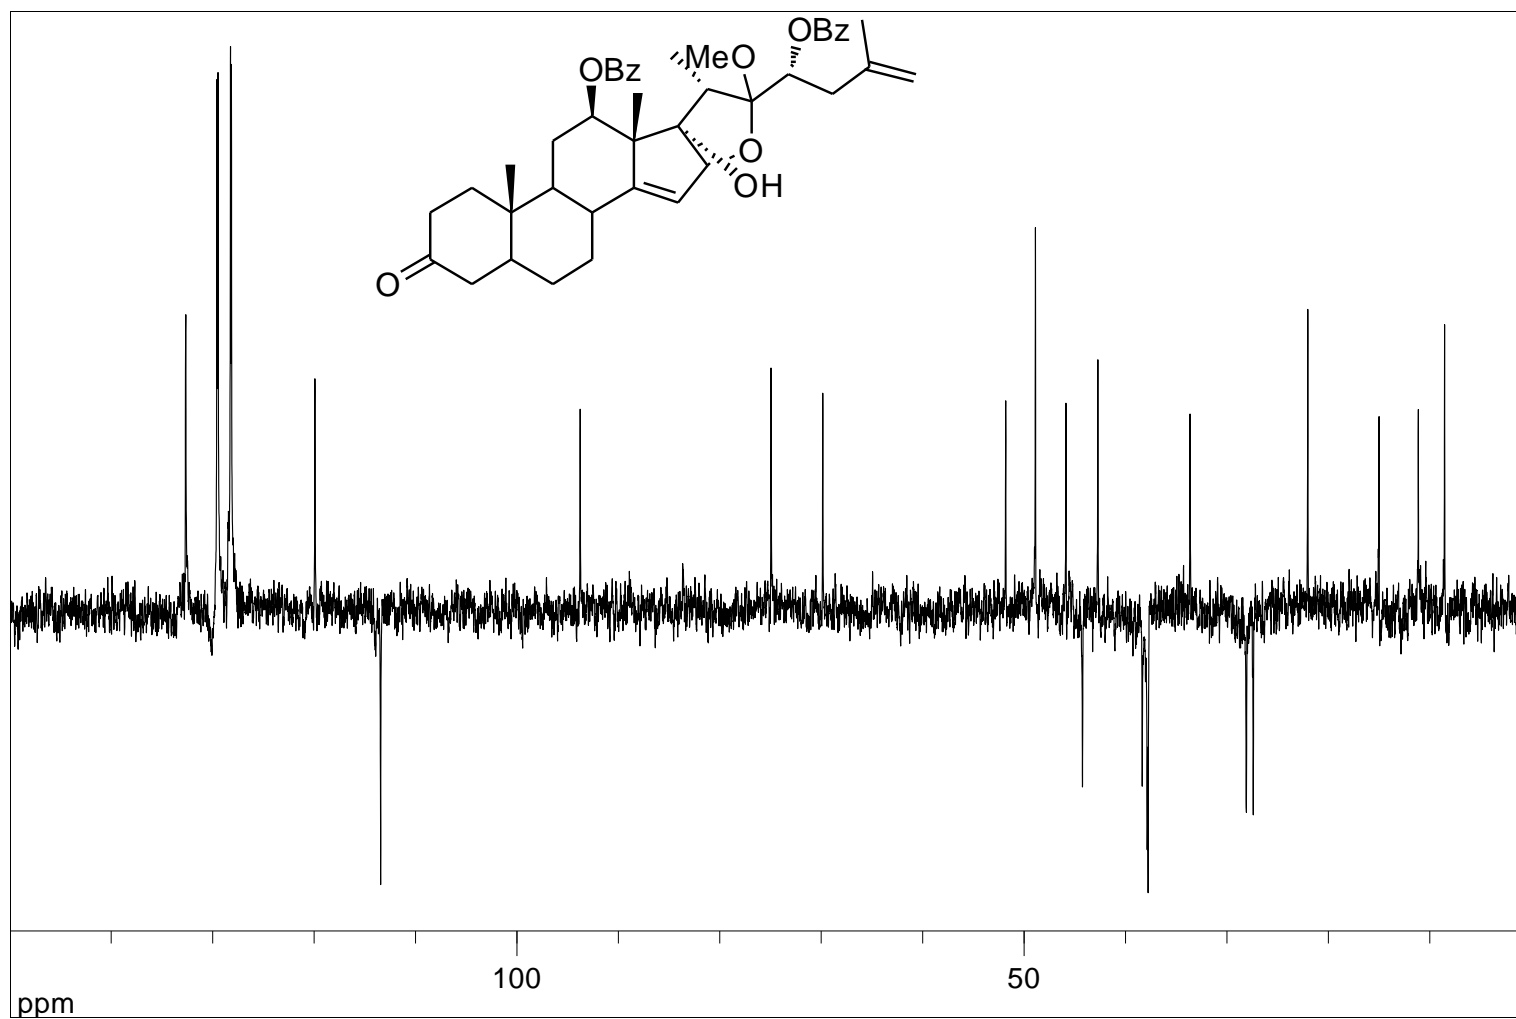



$^{13}\text{C}$  dept 135 NMR (125 MHz,  $\text{CDCl}_3$ ) of compound 24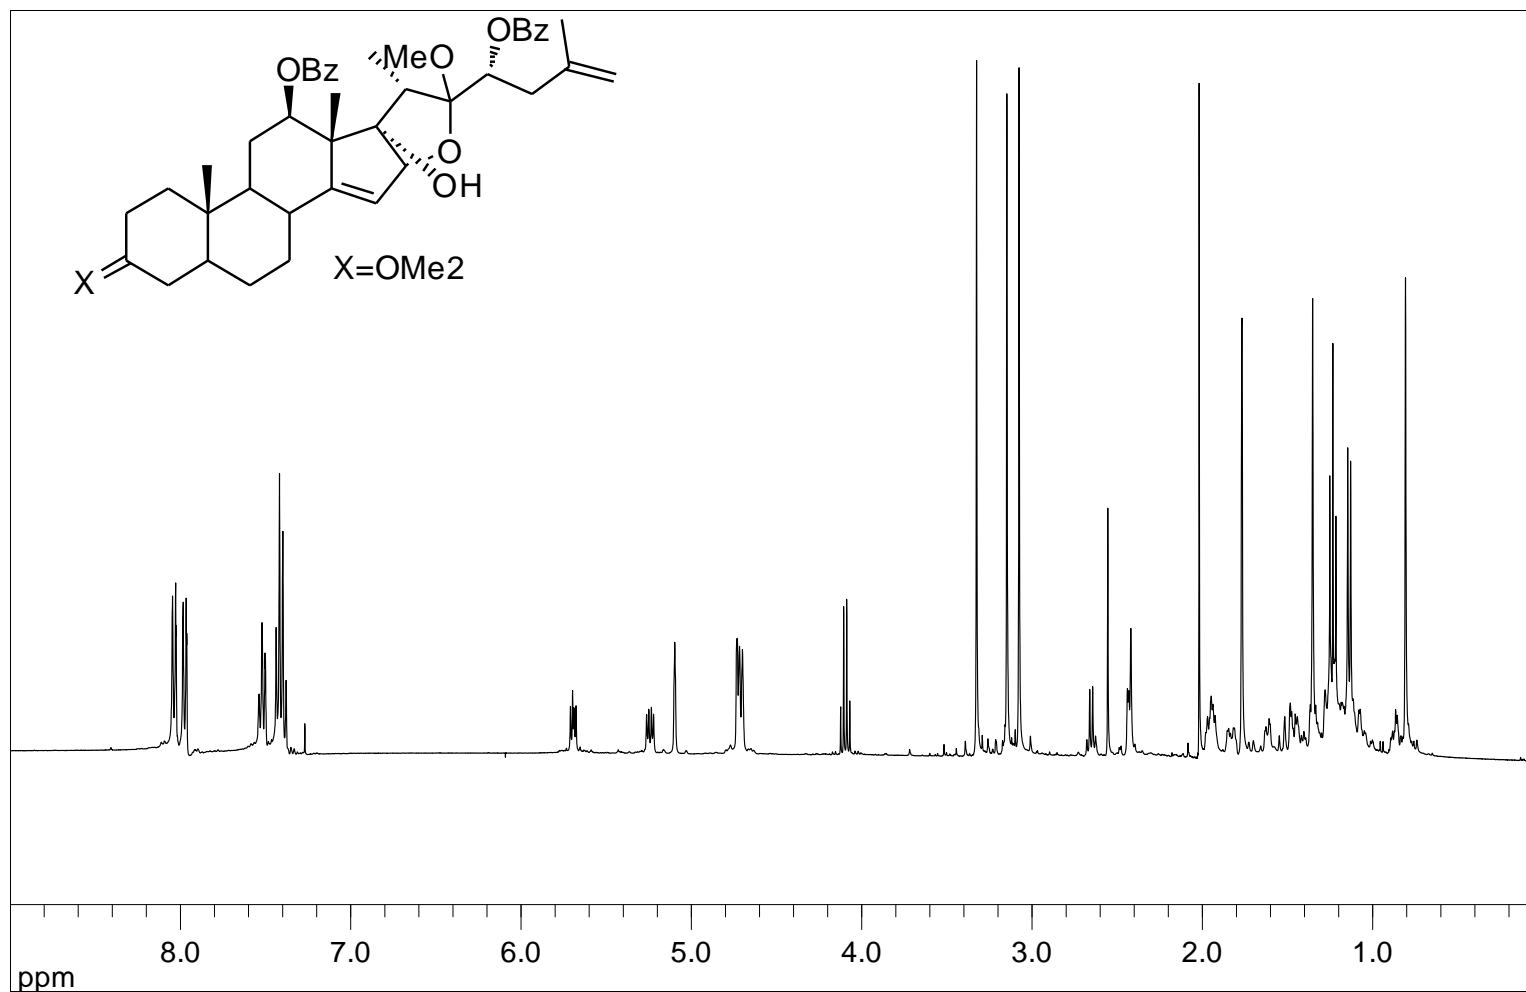 $^1\text{H}$ -NMR (400 MHz,  $\text{CDCl}_3$ ) of compound 24a

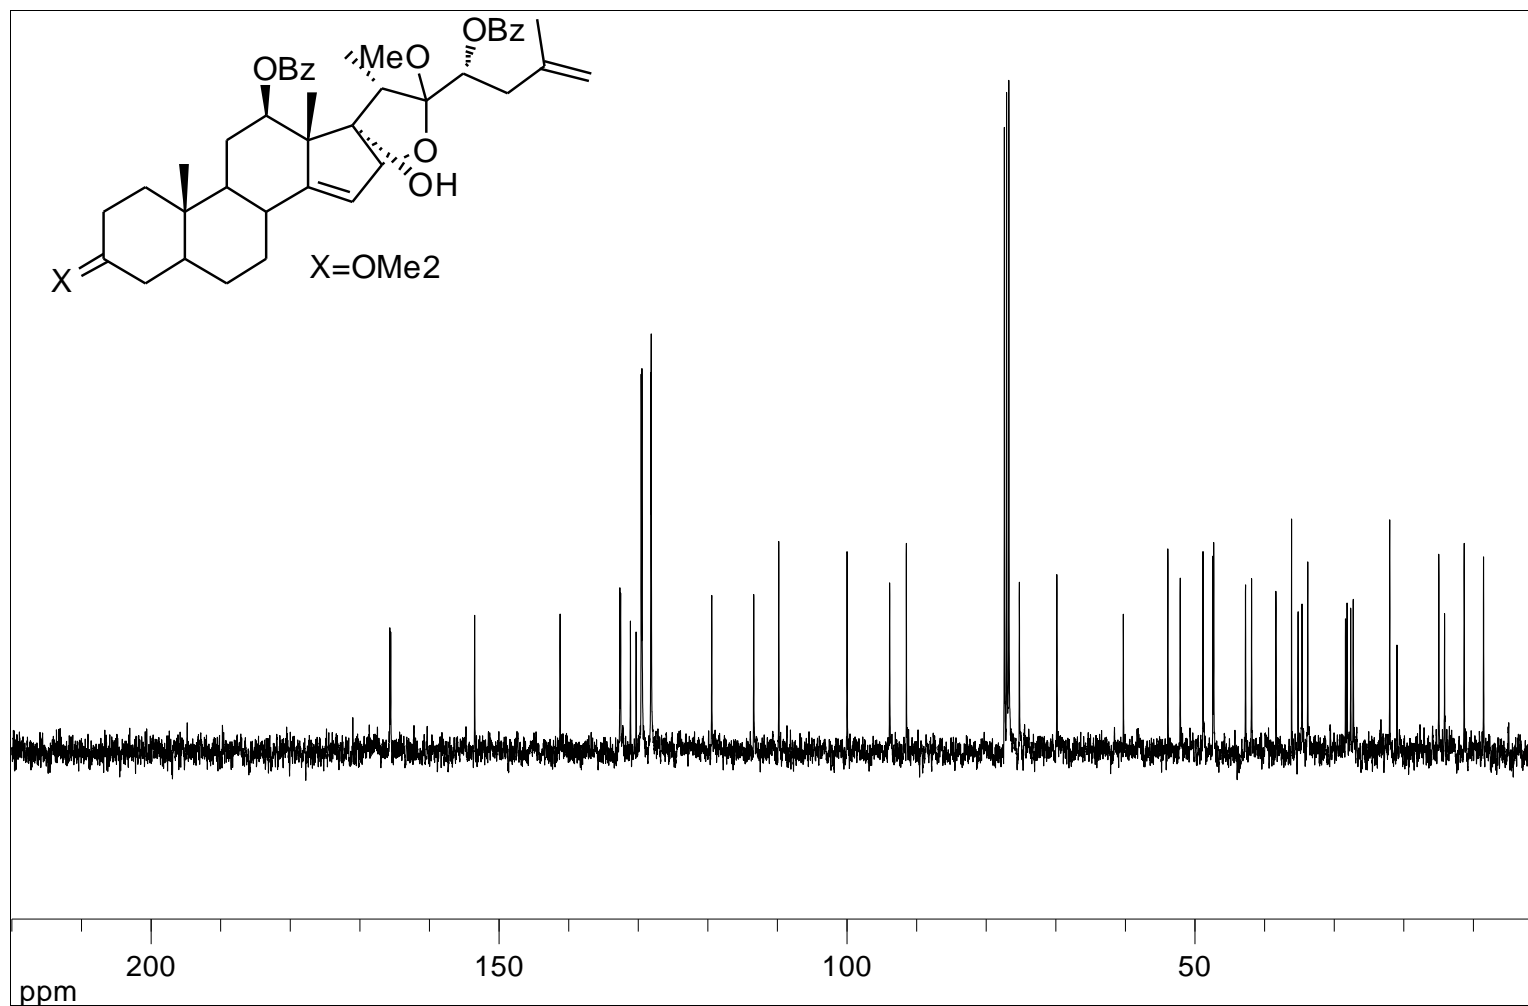

$^{13}\text{C}$  NMR (125 MHz,  $\text{CDCl}_3$ ) of compound 24a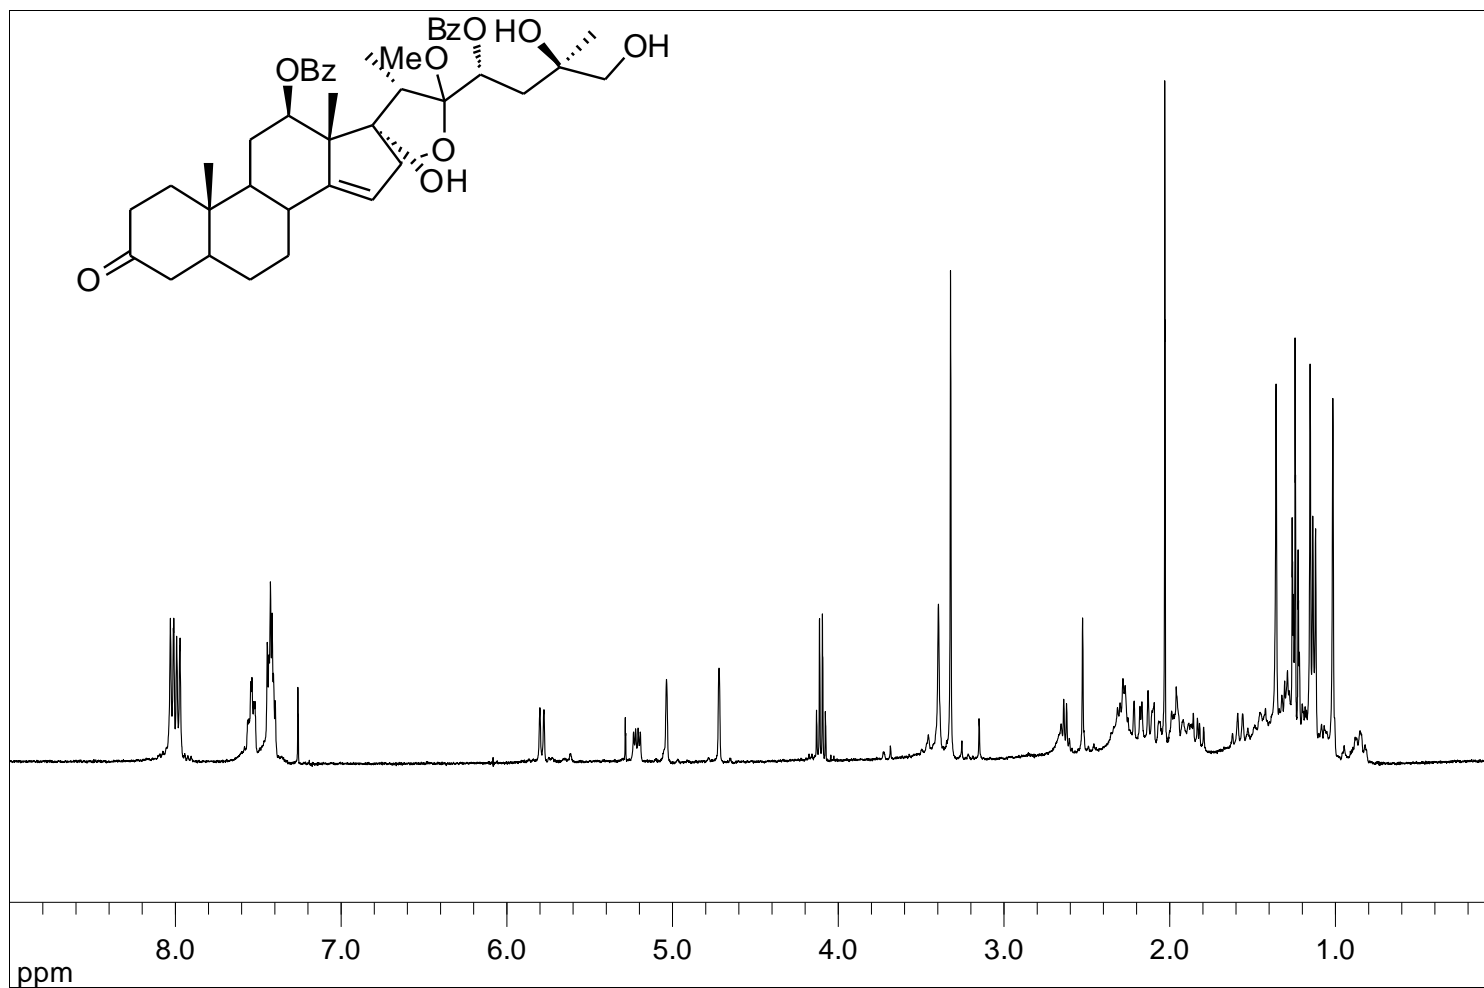

**$^1\text{H-NMR}$  (400 MHz,  $\text{CDCl}_3$ ) of compound 25**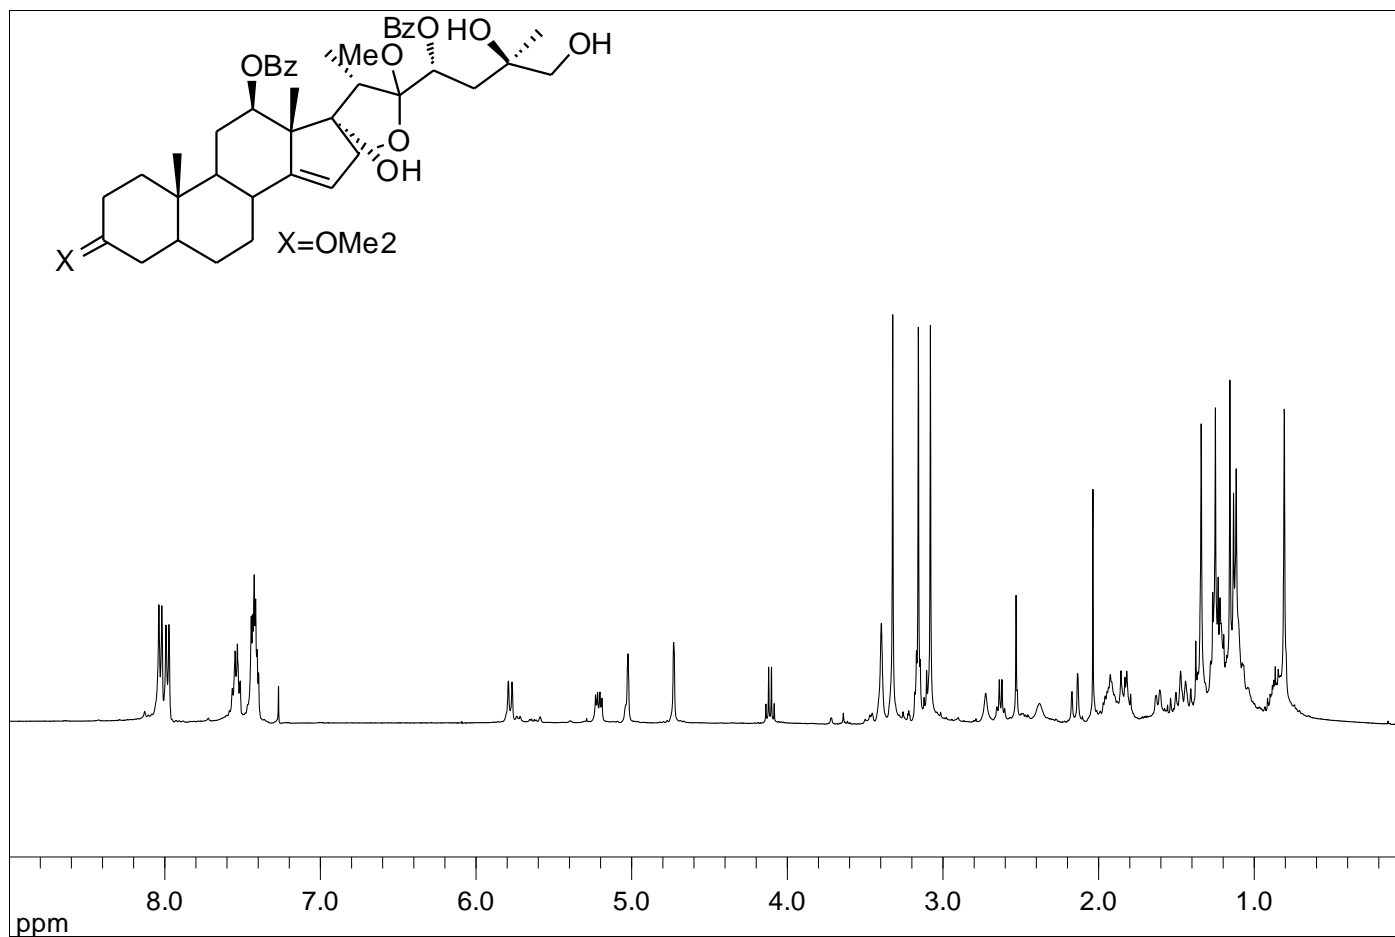

**$^1\text{H-NMR}$  (400 MHz,  $\text{CDCl}_3$ ) of compound 25a**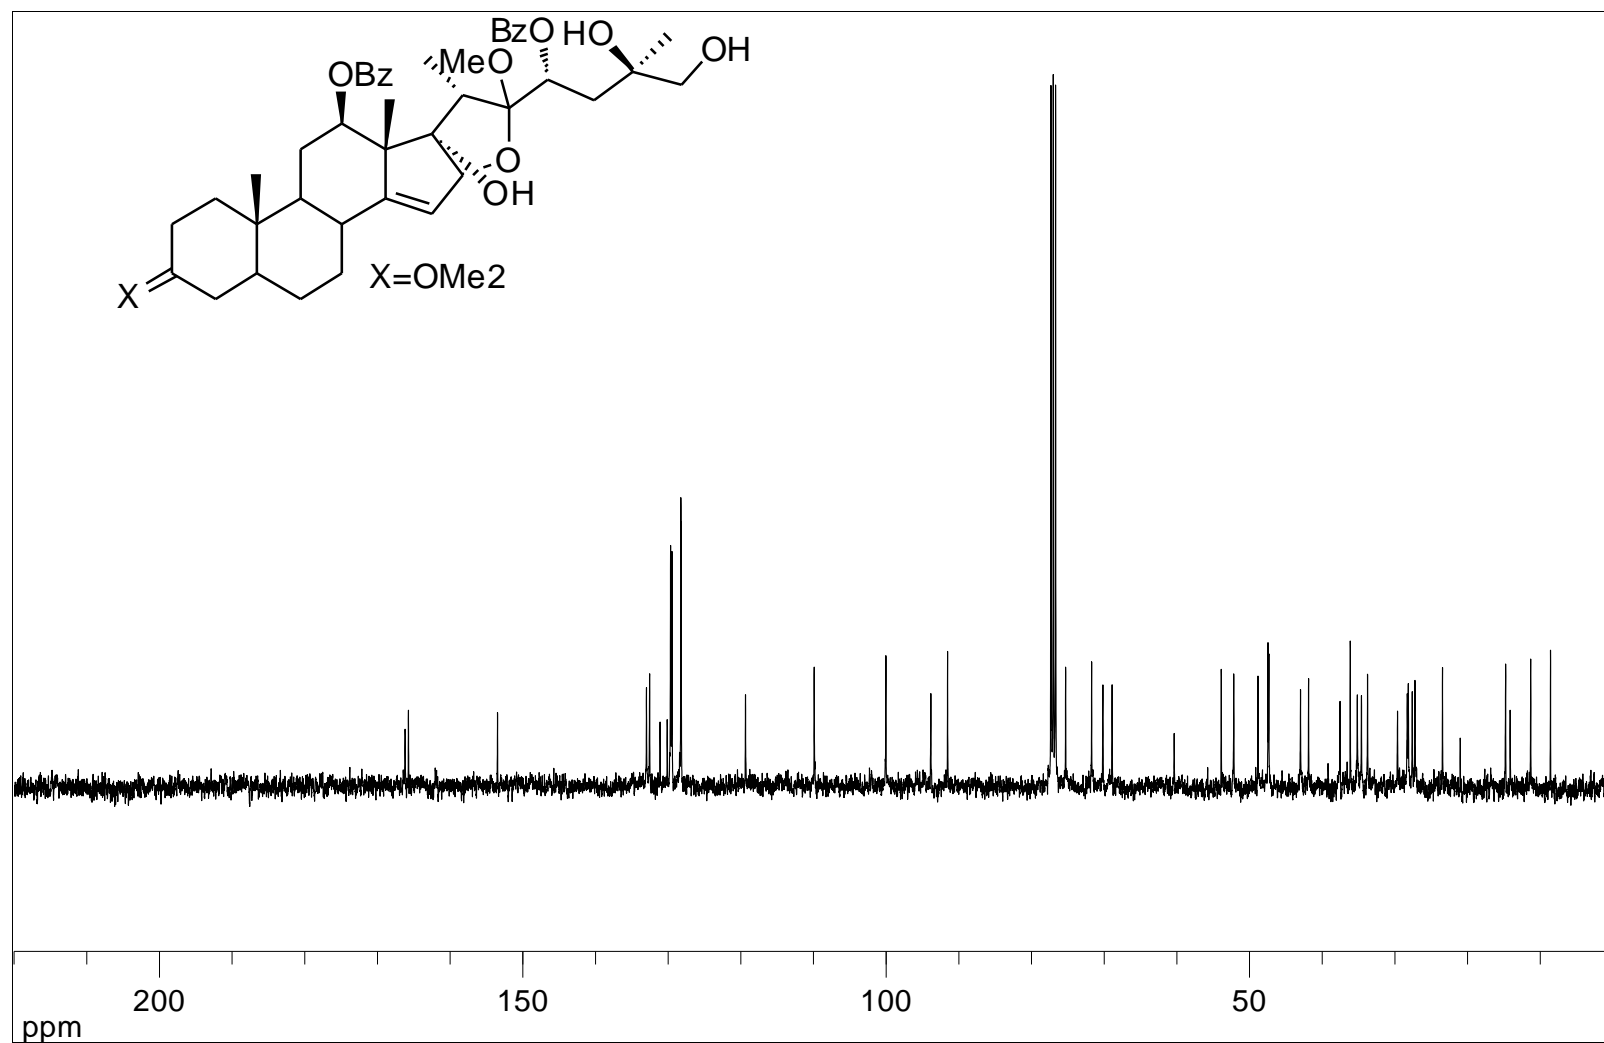

$^{13}\text{C}$  NMR (125 MHz,  $\text{CDCl}_3$ ) of compound 25a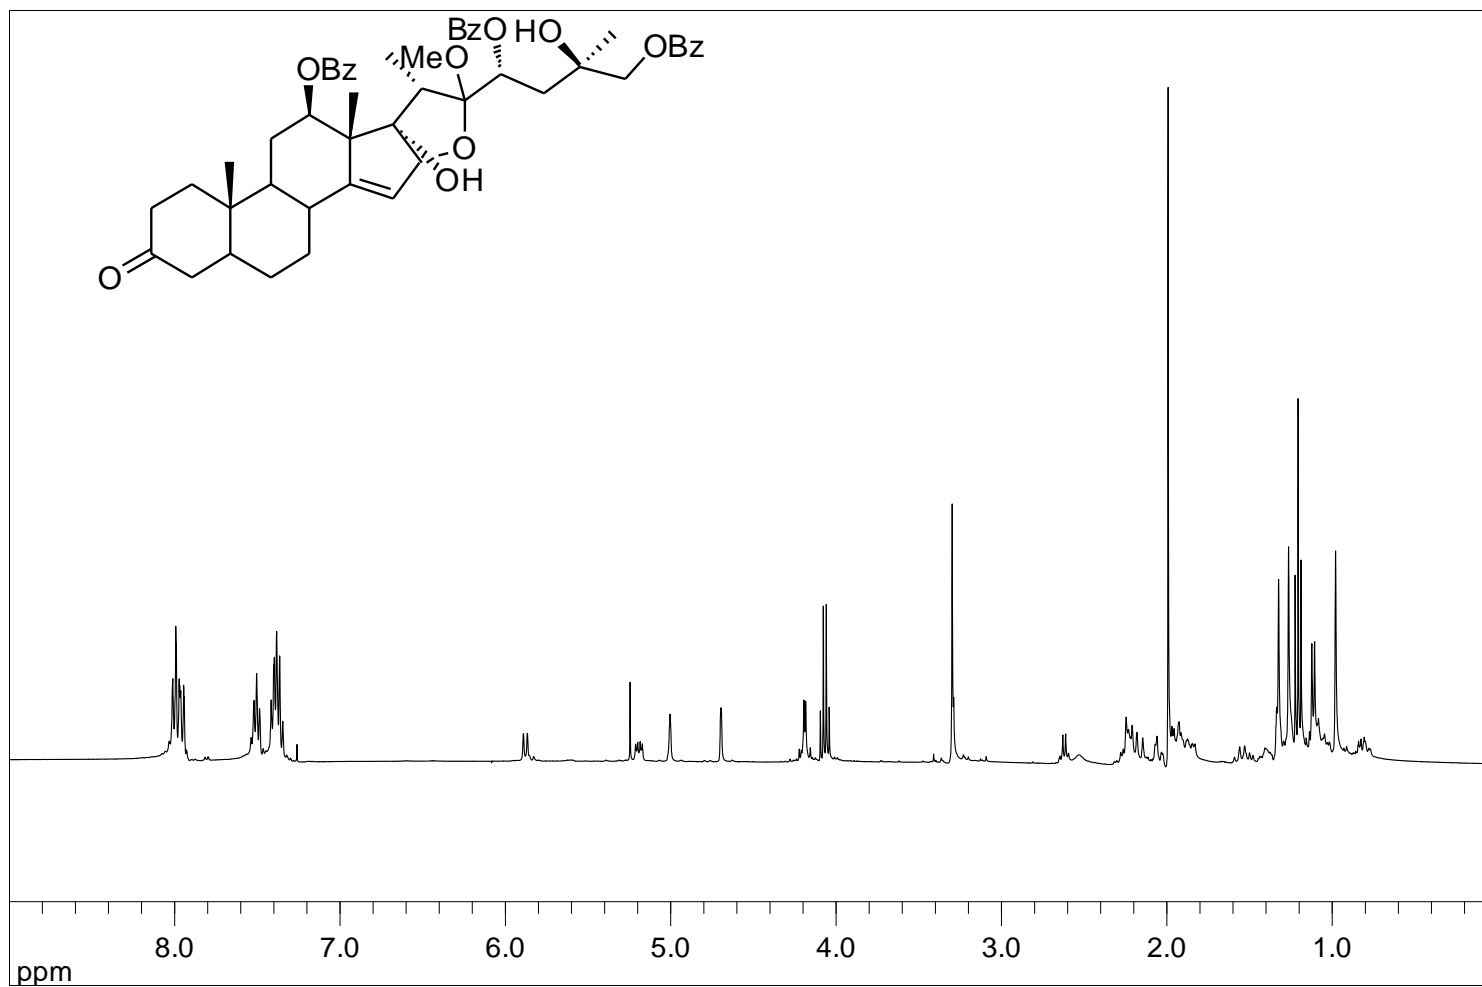

**$^1\text{H-NMR}$  (400 MHz,  $\text{CDCl}_3$ ) of compound 26**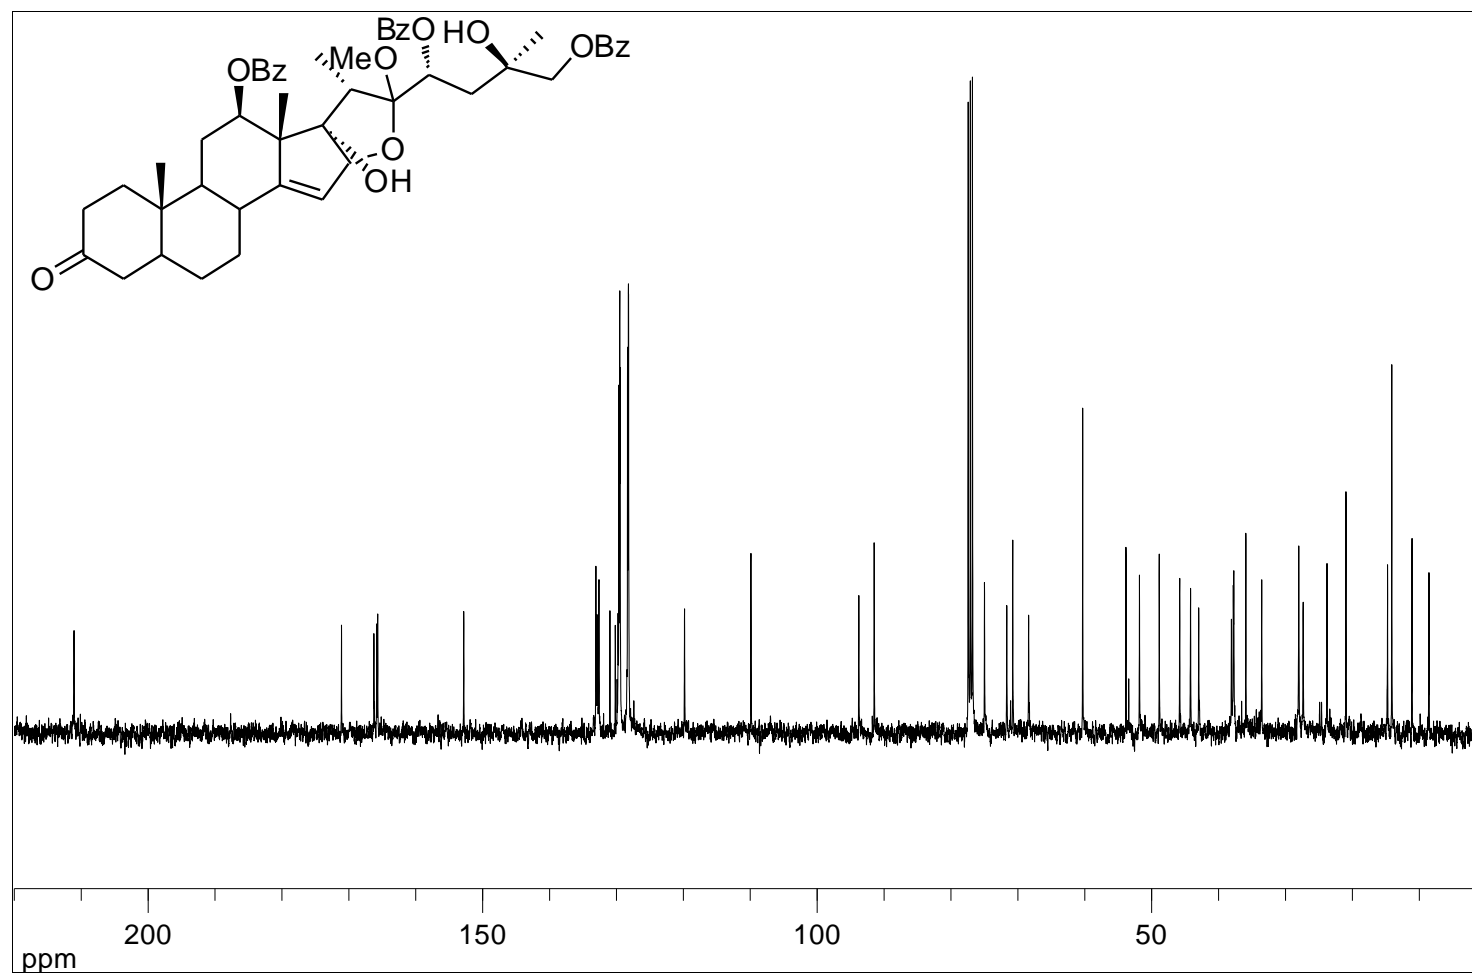 **$^{13}\text{C}$  NMR (125 MHz,  $\text{CDCl}_3$ ) of compound 26**

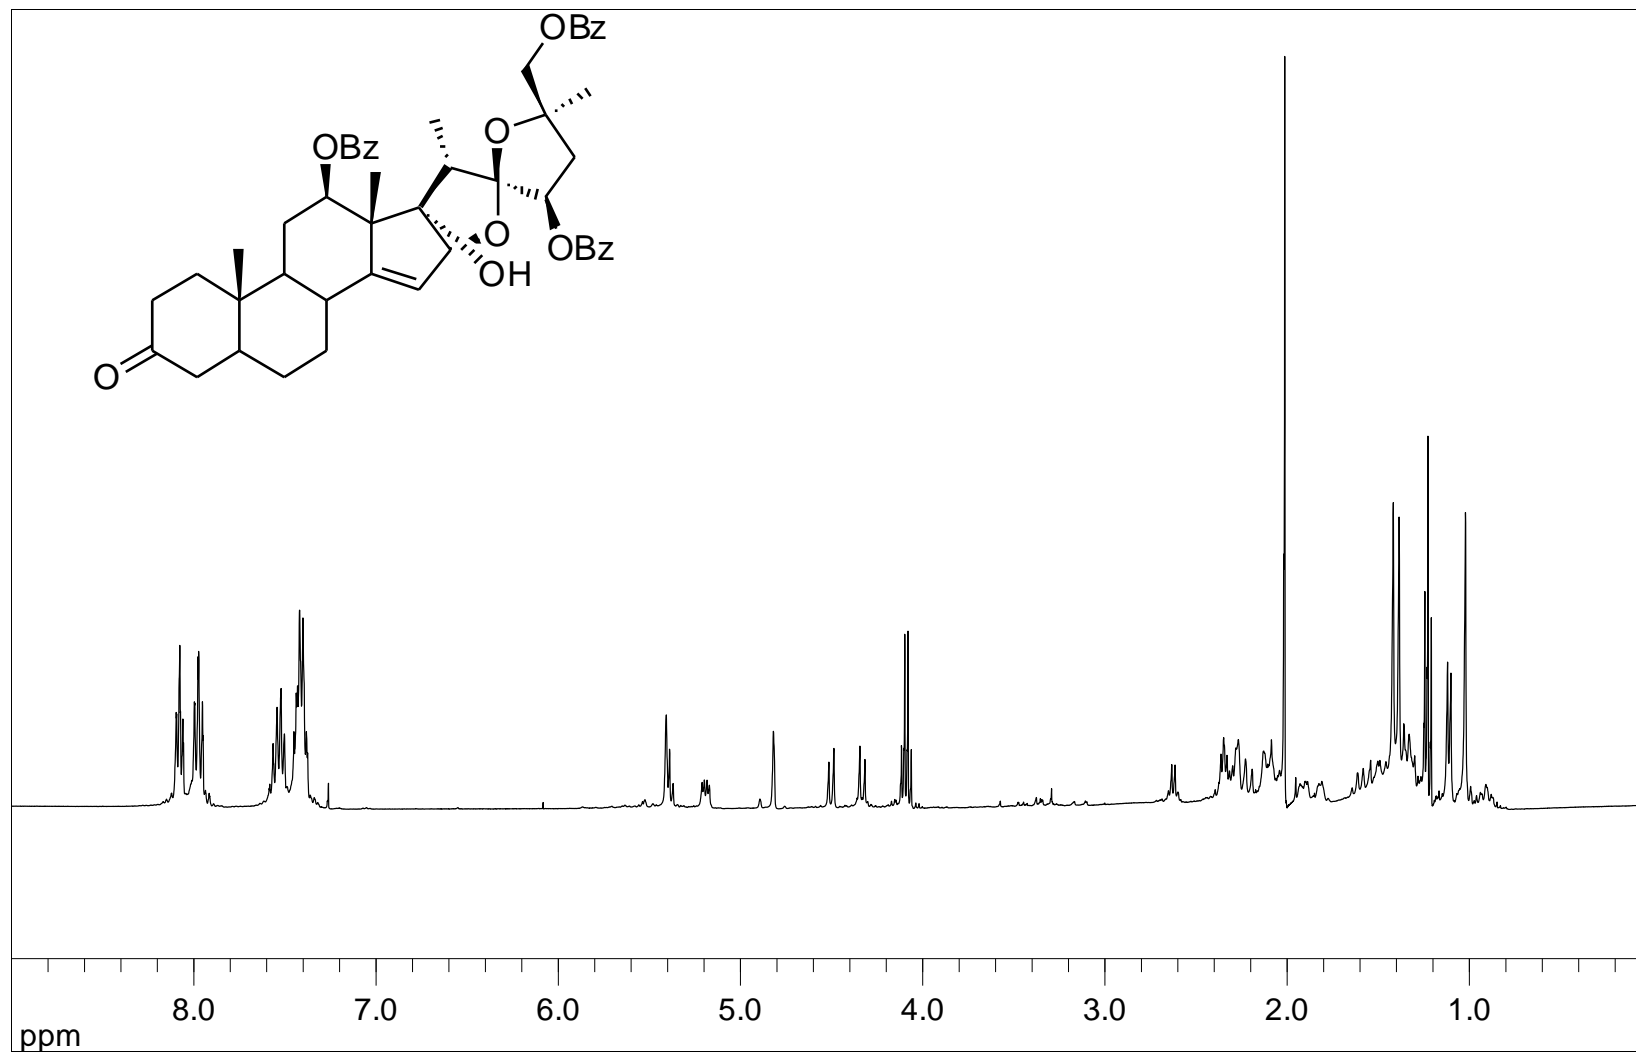

$^1\text{H-NMR}$  (400 MHz,  $\text{CDCl}_3$ ) of compound 27



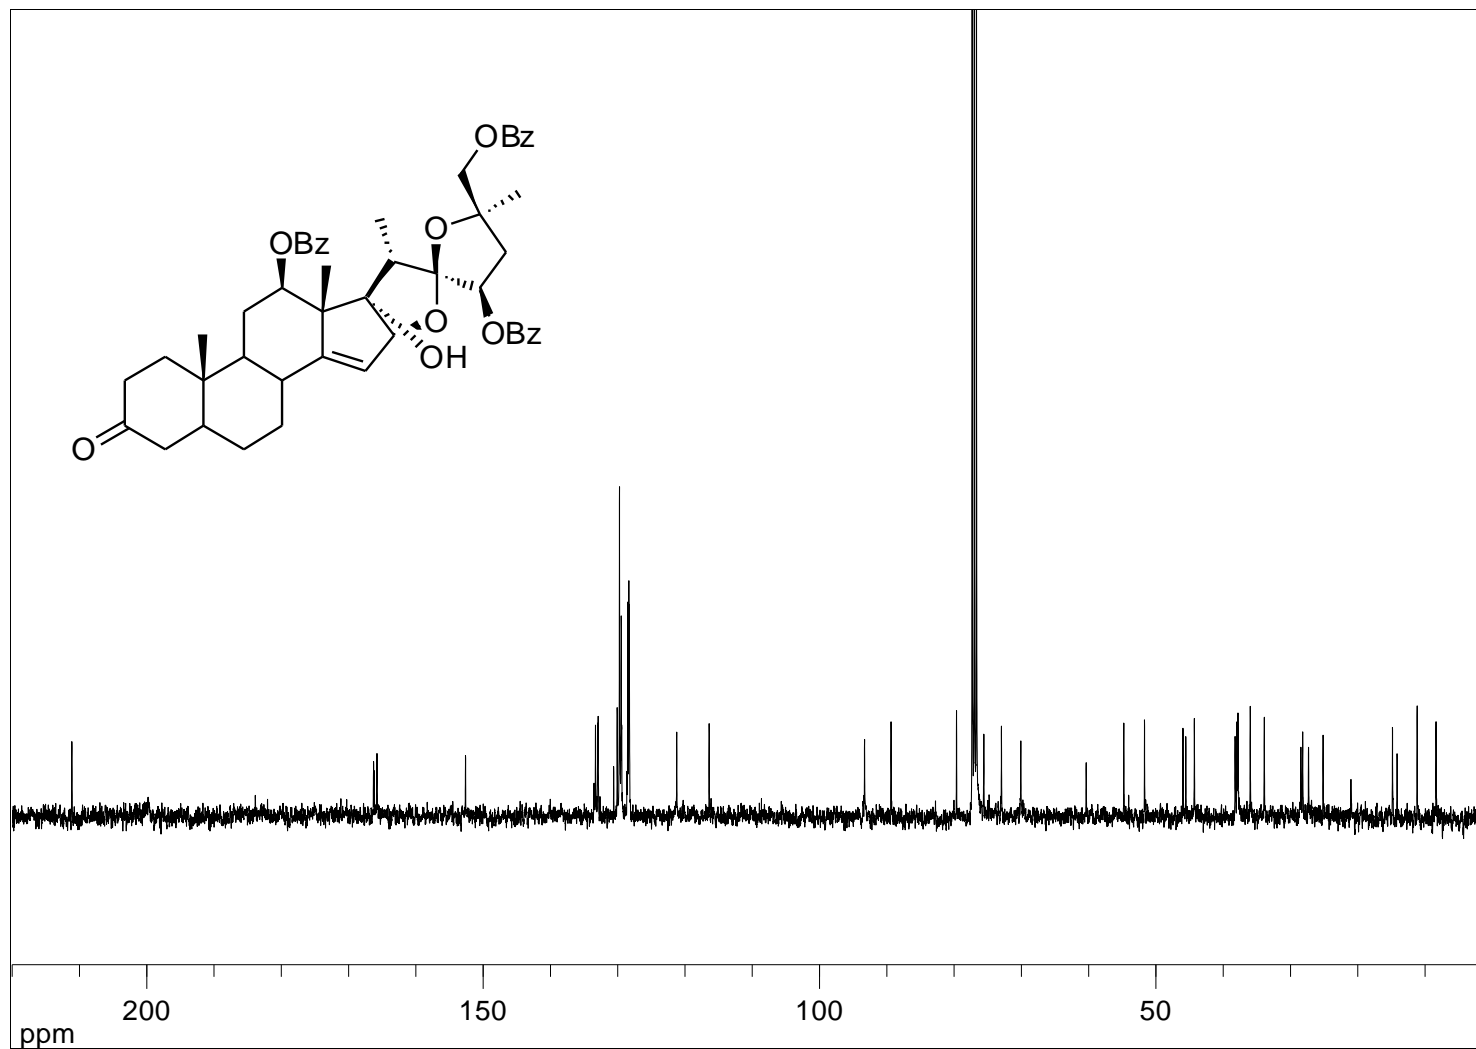

$^{13}\text{C}$  NMR (125 MHz,  $\text{CDCl}_3$ ) of compound 27

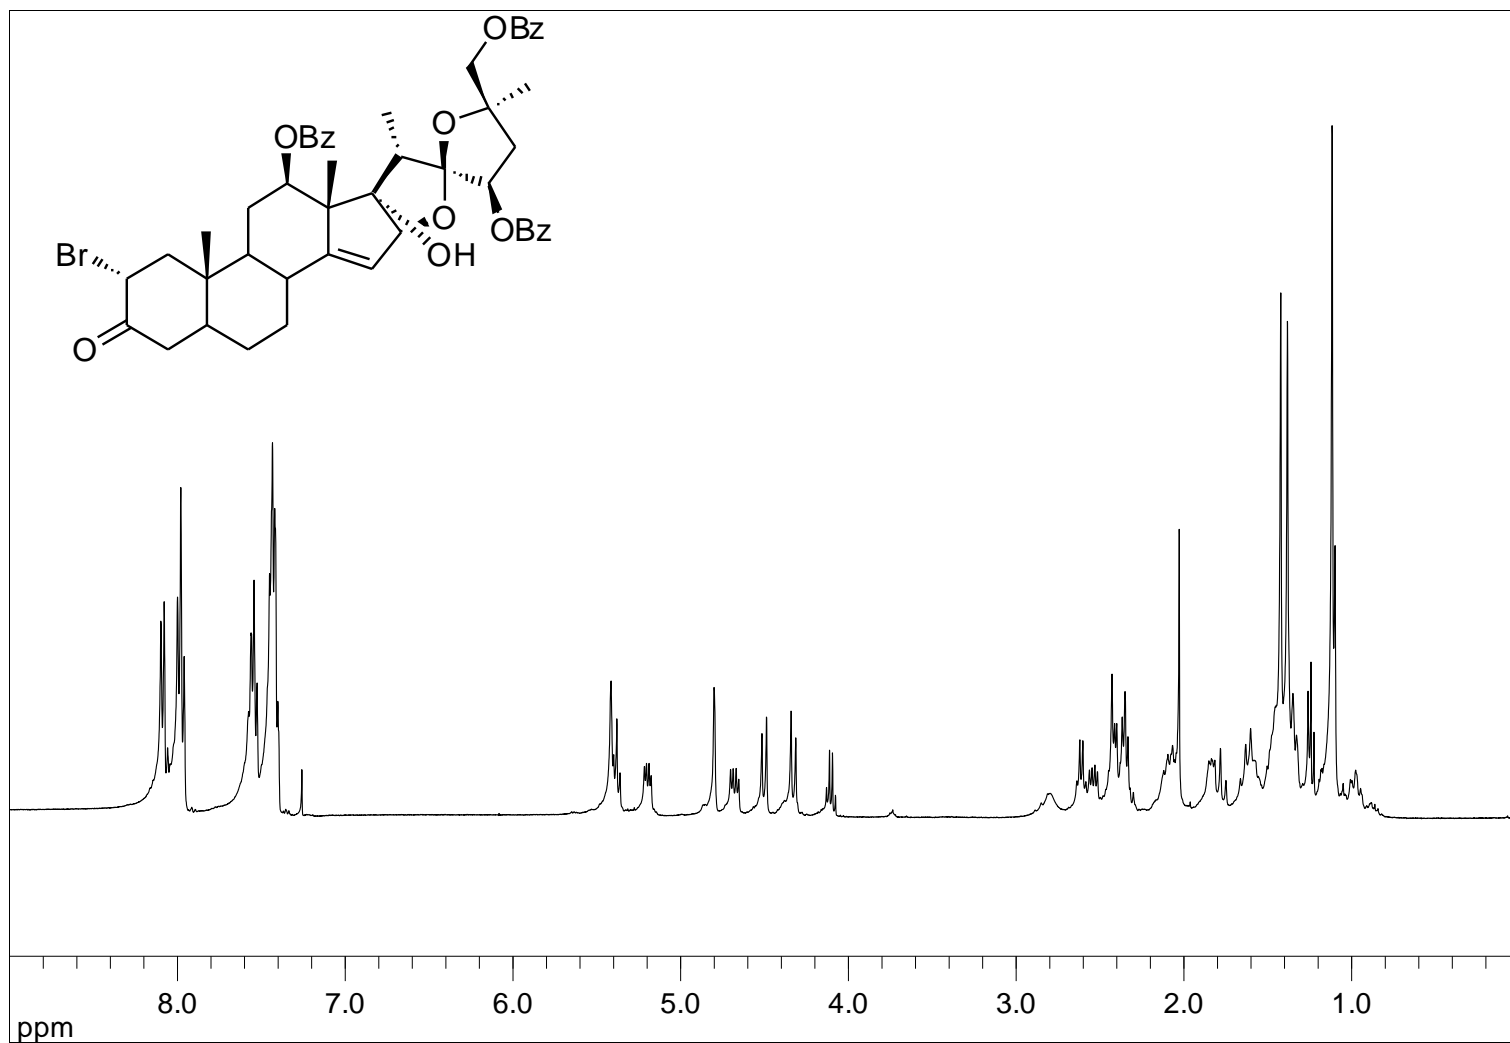

<sup>1</sup>H-NMR (400 MHz, CDCl<sub>3</sub>) of compound 28

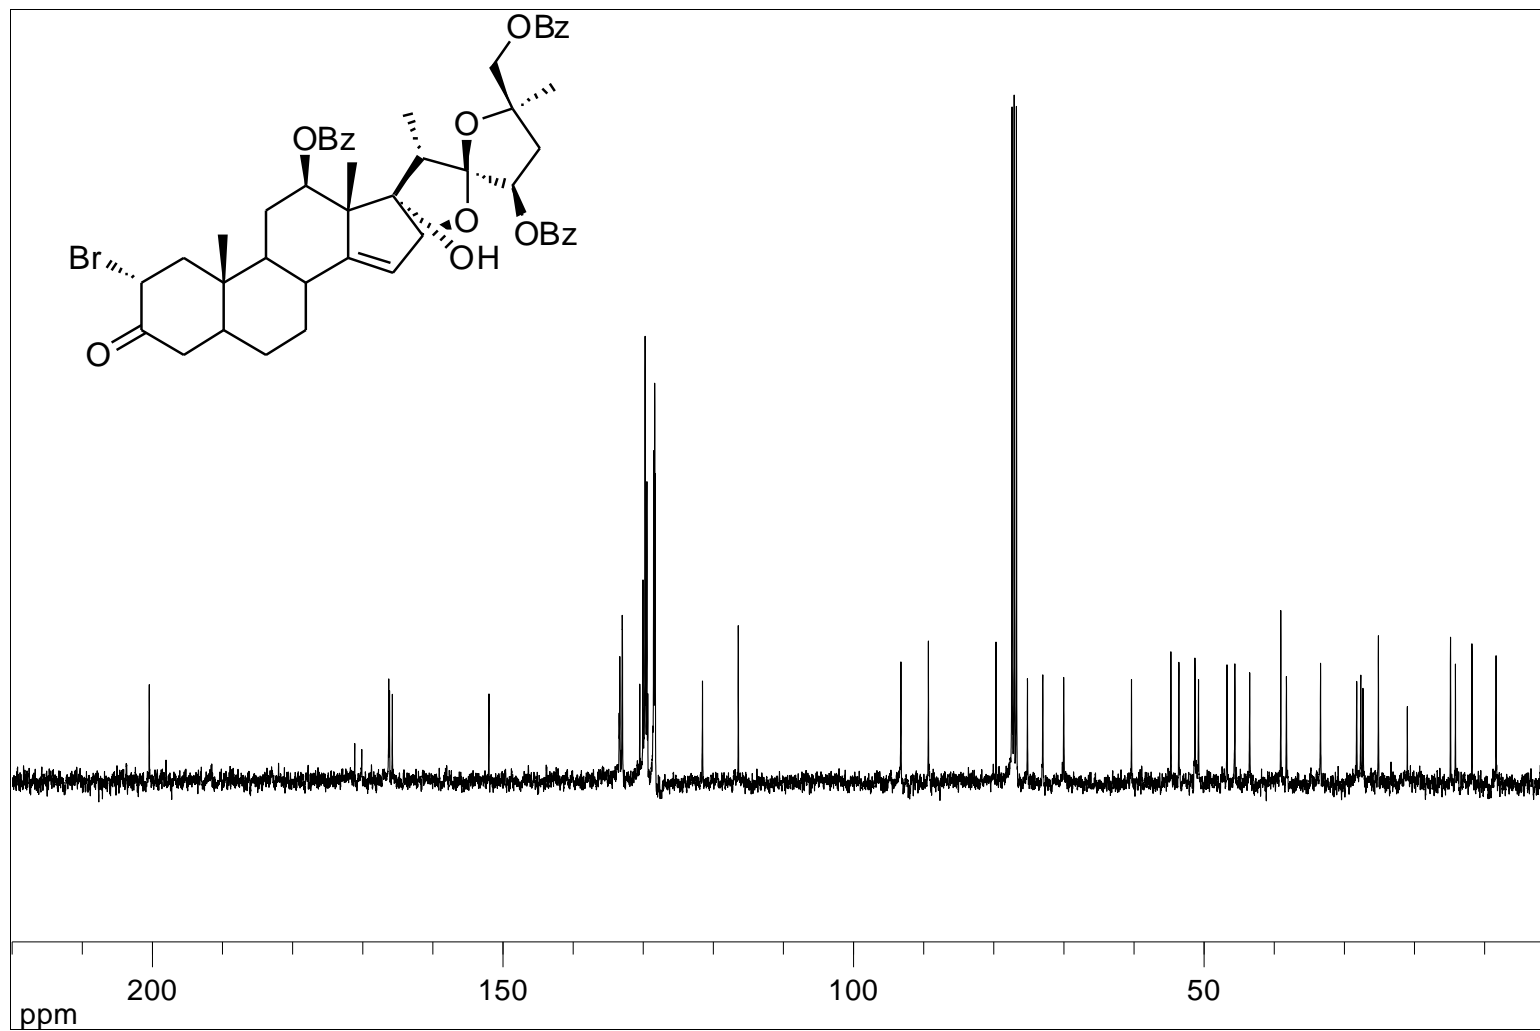 $^{13}\text{C}$  NMR (125 MHz,  $\text{CDCl}_3$ ) of compound 28

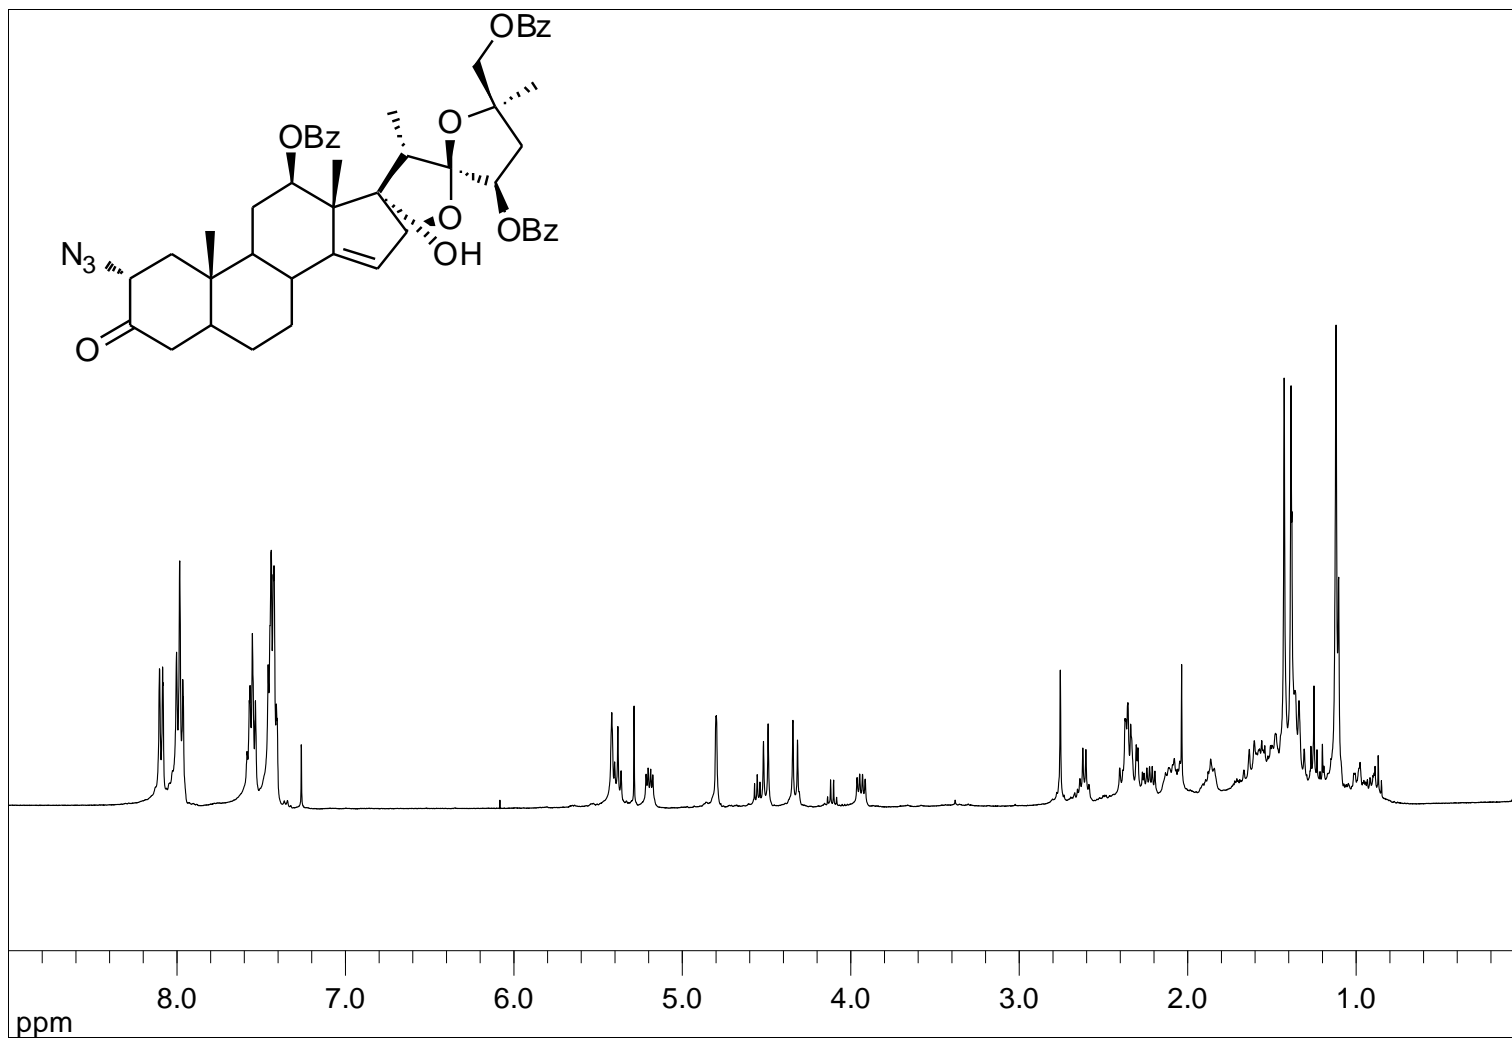

$^1\text{H-NMR}$  (400 MHz,  $\text{CDCl}_3$ ) of compound 29

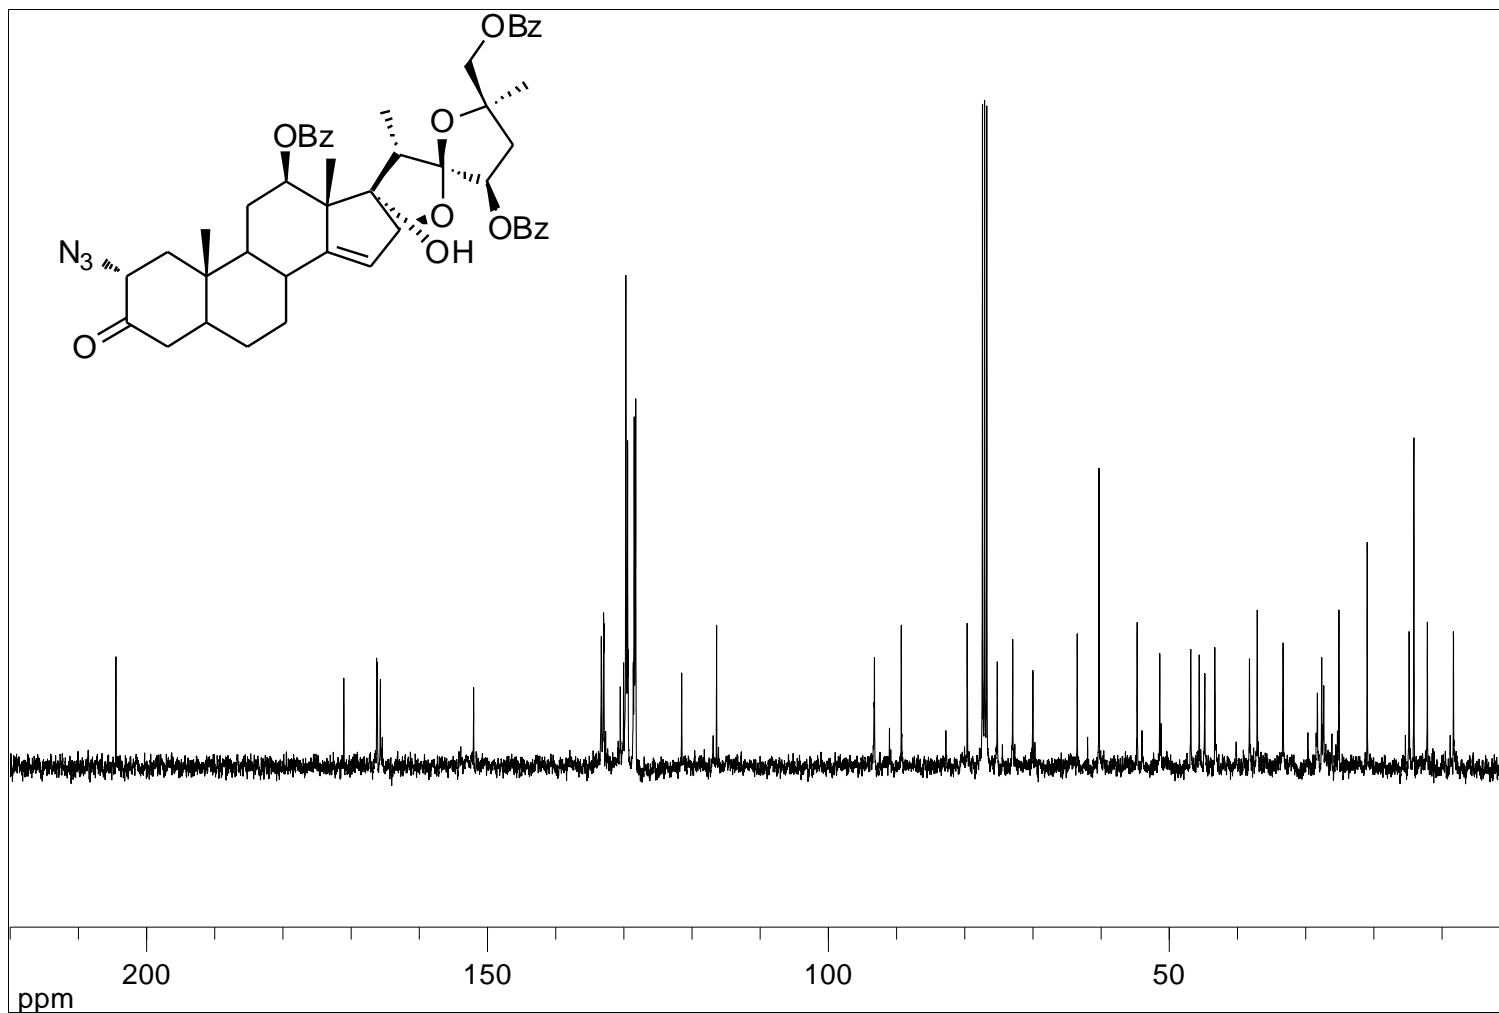

$^{13}\text{C}$  NMR (125 MHz,  $\text{CDCl}_3$ ) of compound 29

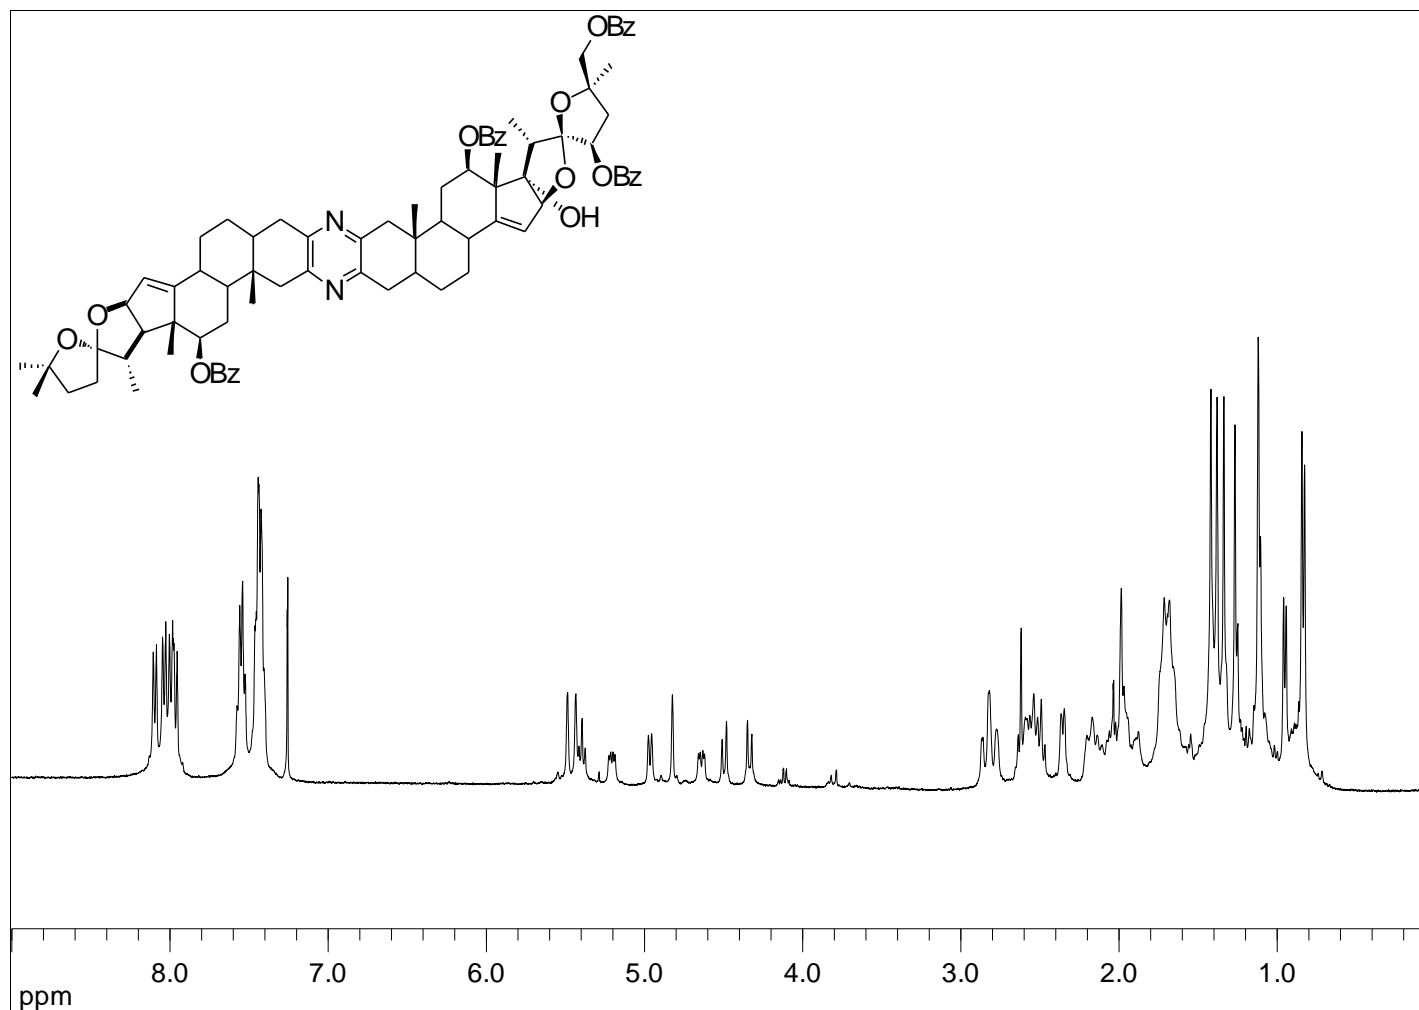

**<sup>1</sup>H-NMR (400 MHz, CDCl<sub>3</sub>) of compound 31**

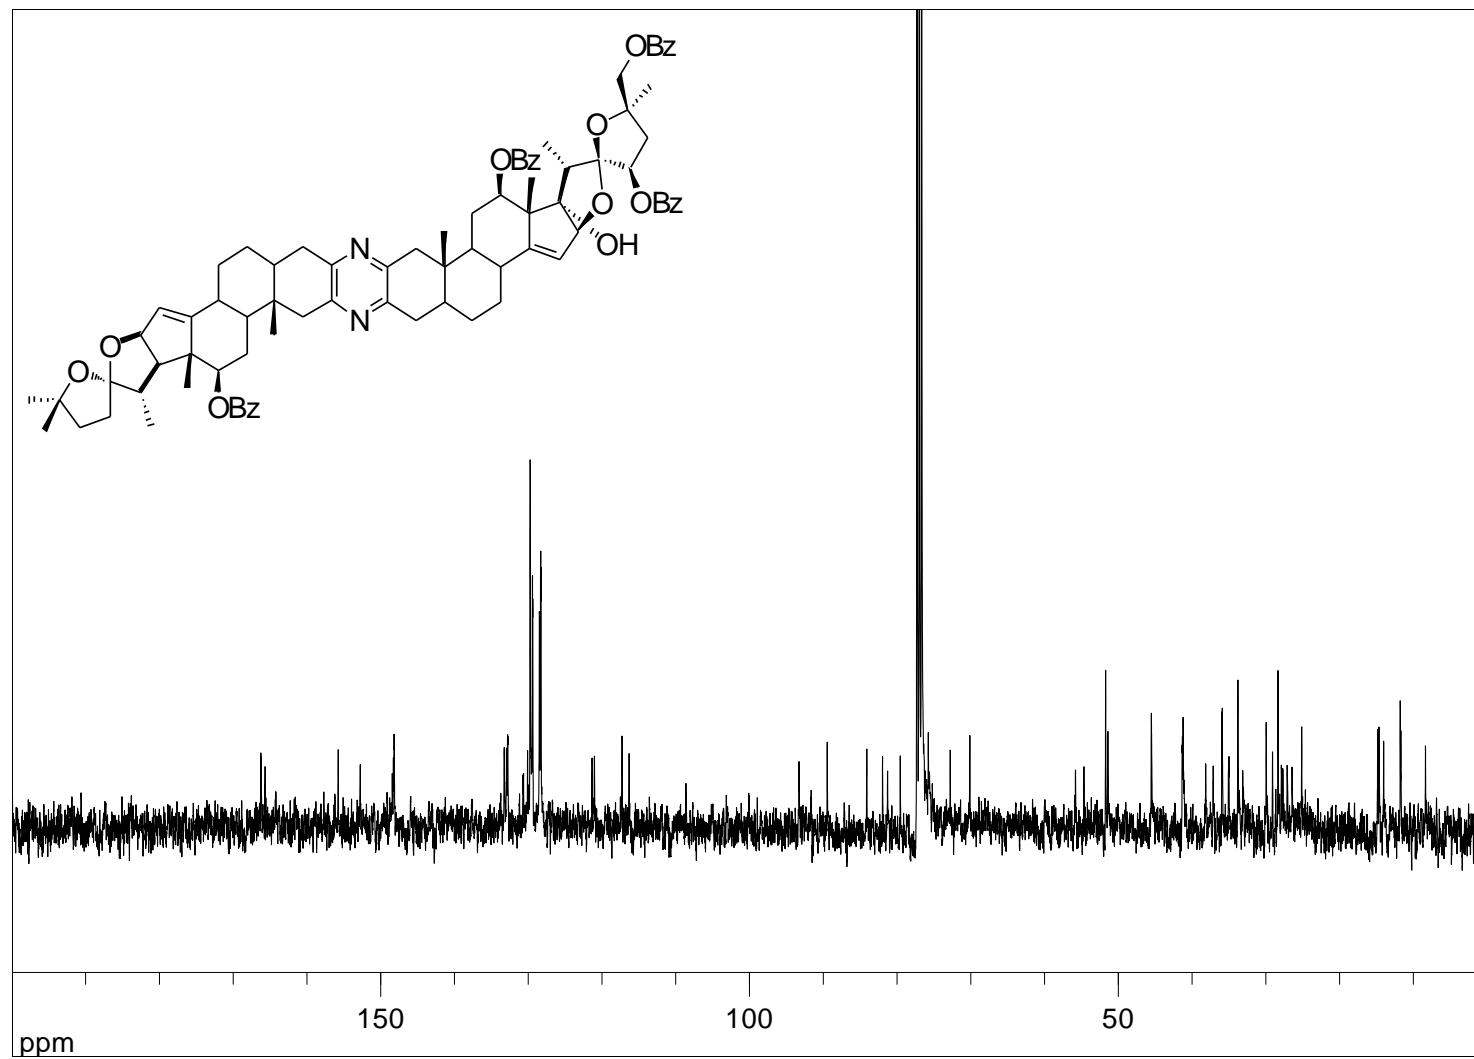

$^{13}\text{C}$  NMR (125 MHz,  $\text{CDCl}_3$ ) of compound 31

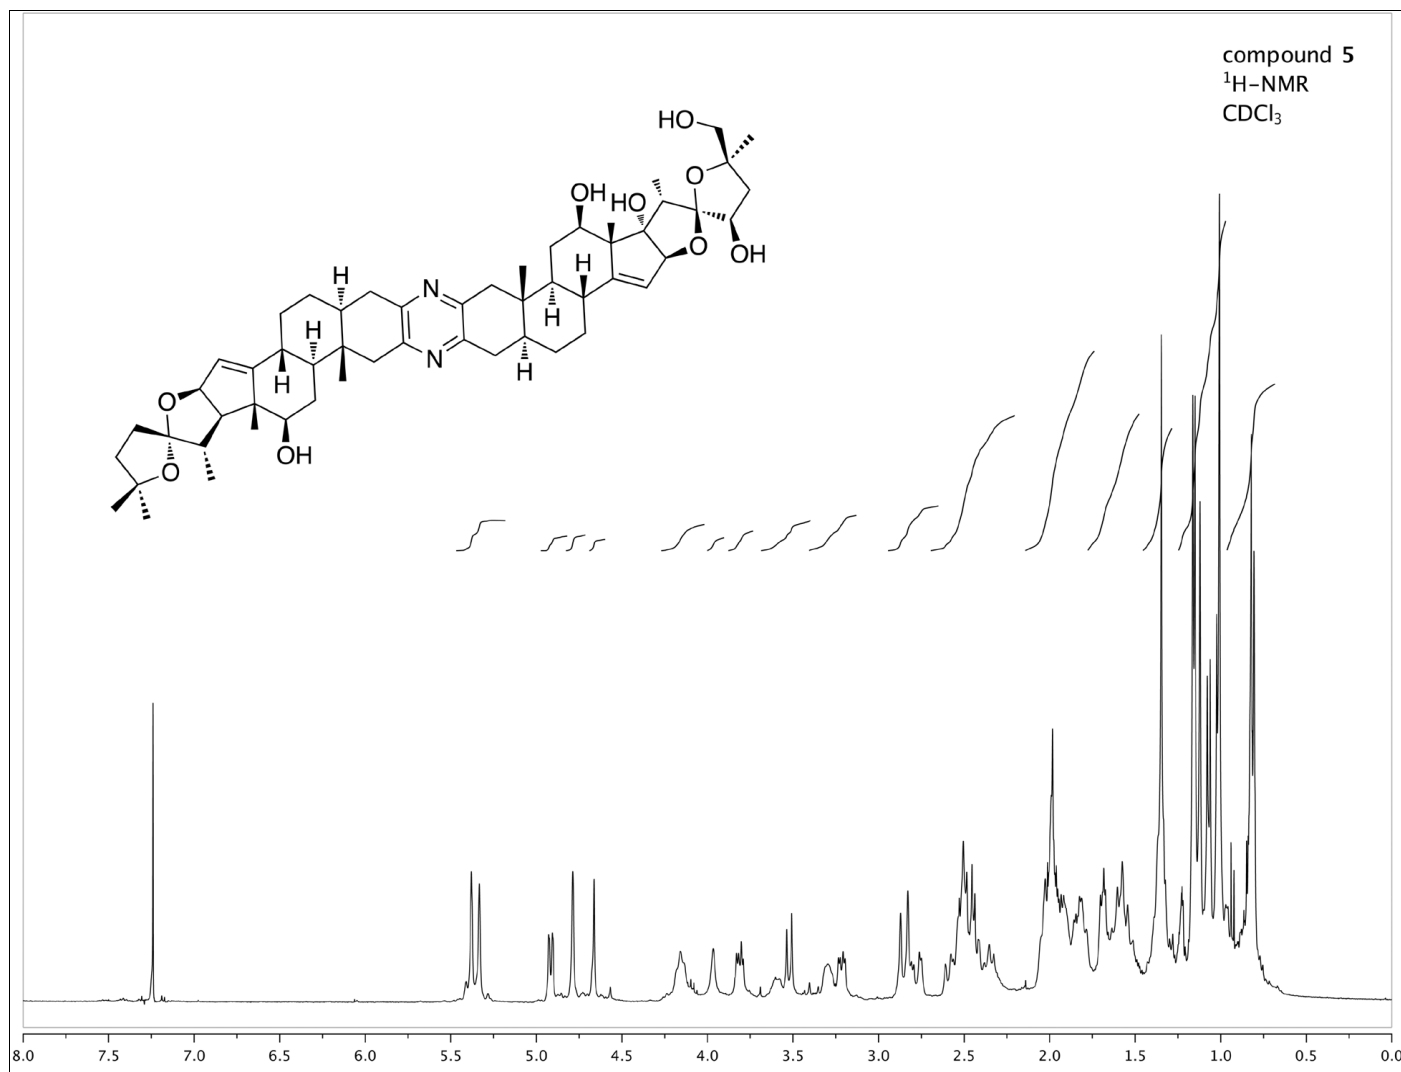

$^1\text{H-NMR}$  (400 MHz,  $\text{CDCl}_3$ ) of compound 5



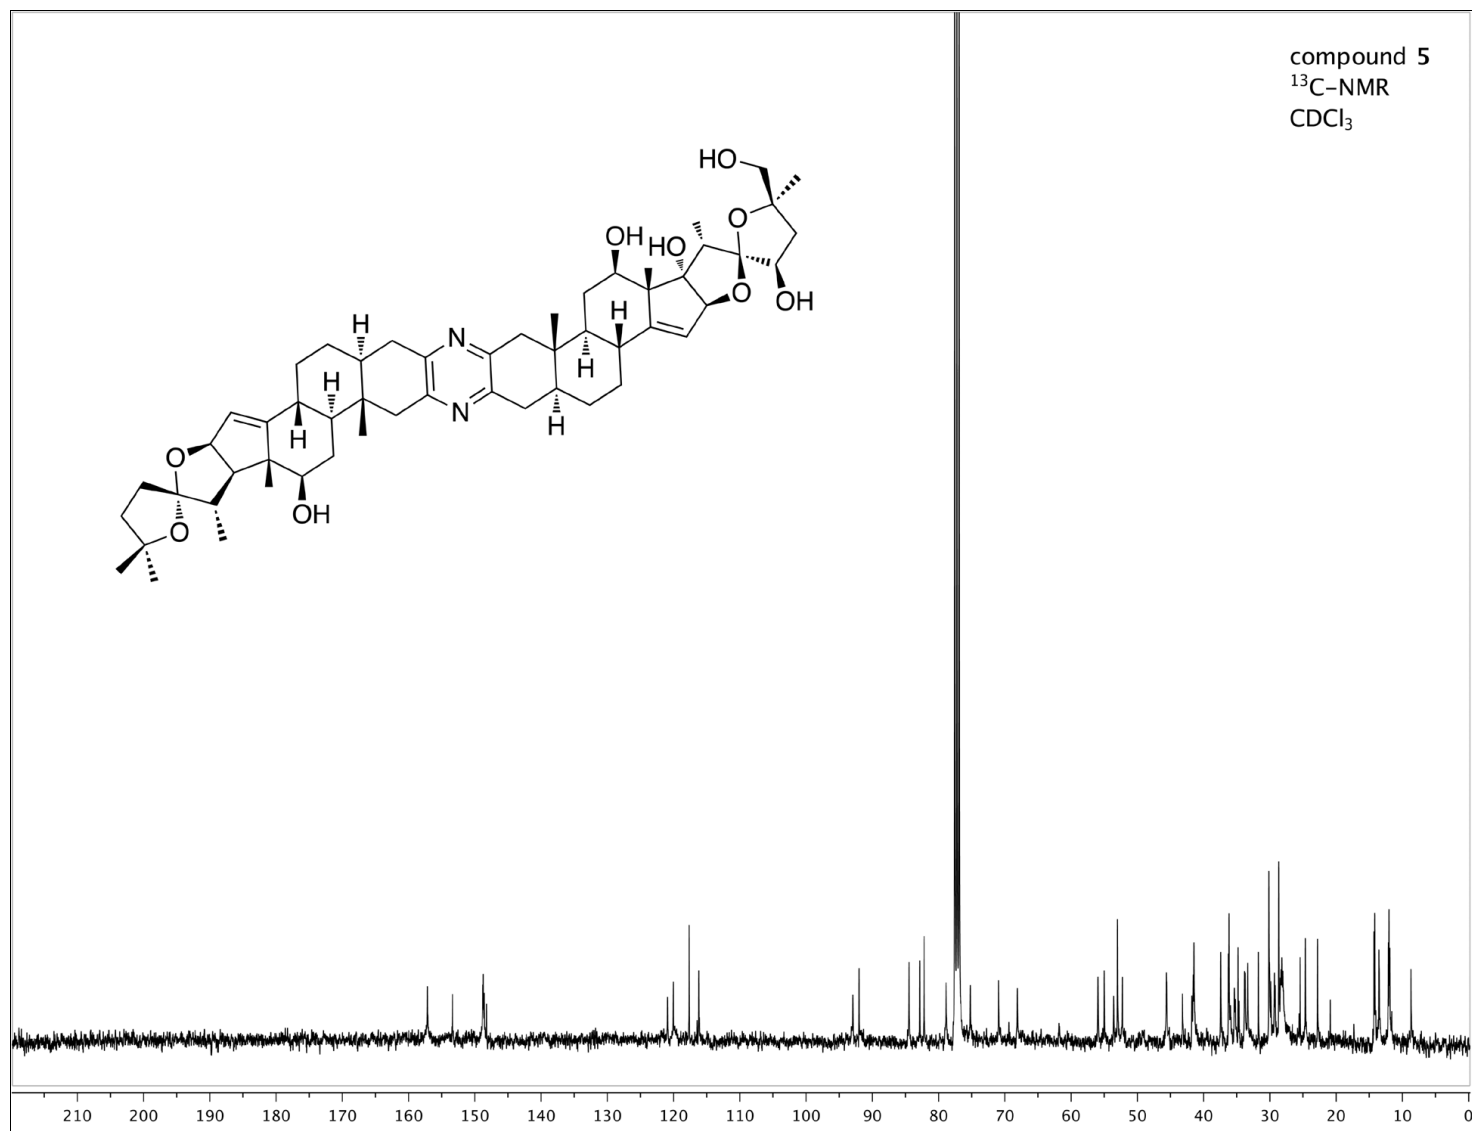

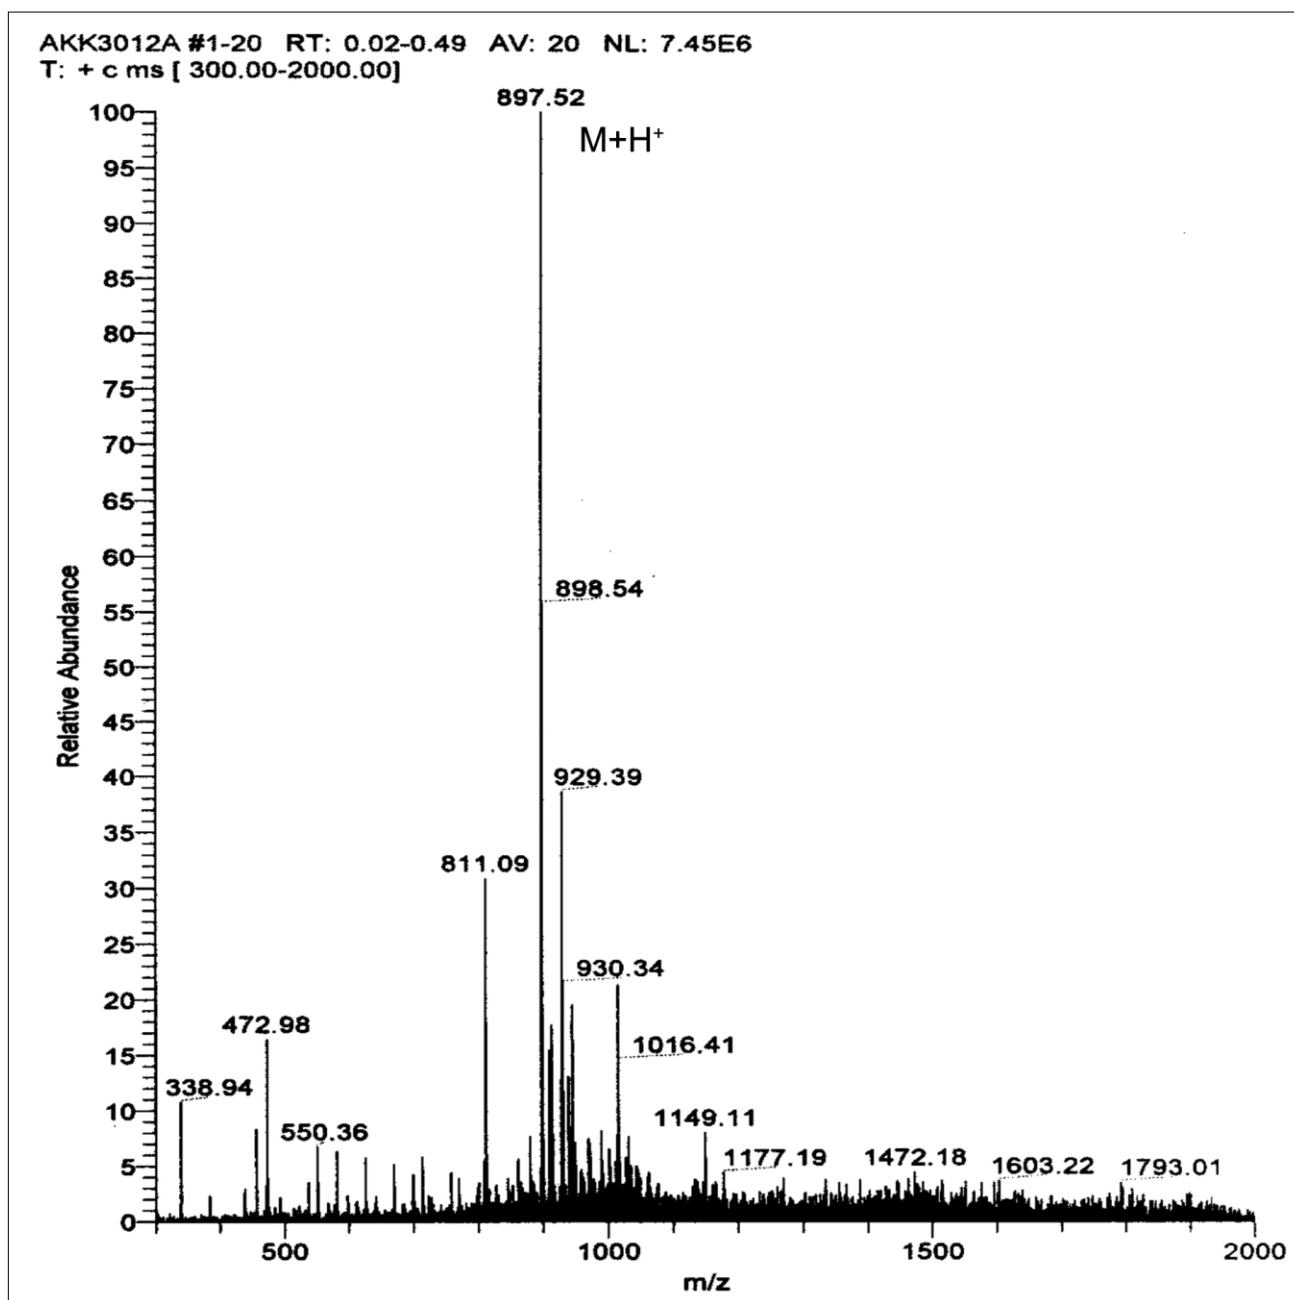

LR-ESI Mass spectral data of 25-*epi* Ritterostatin GN1N, 5. (HRMS also recorded)

V. HPLC data of 25-*epi* Ritterostatin GN1N, 5

Sample Name: 139-1-148  
 Comments : 25-*epi* Ritterostatin GN1N  
 75/25 MeOH/H2O , 1.0mL/min  
 Econosphere C18 5u, 4.6x150mm [606020586.1], no guard

Vial No: 50                      Inj Date: 07/23/2008                      Operator: Douglas Lantrip  
 Inj Vol: 25.0 uL                  Inj Time: 00:36:54 pm                      Acq Meth: CSTATB-RP2.M

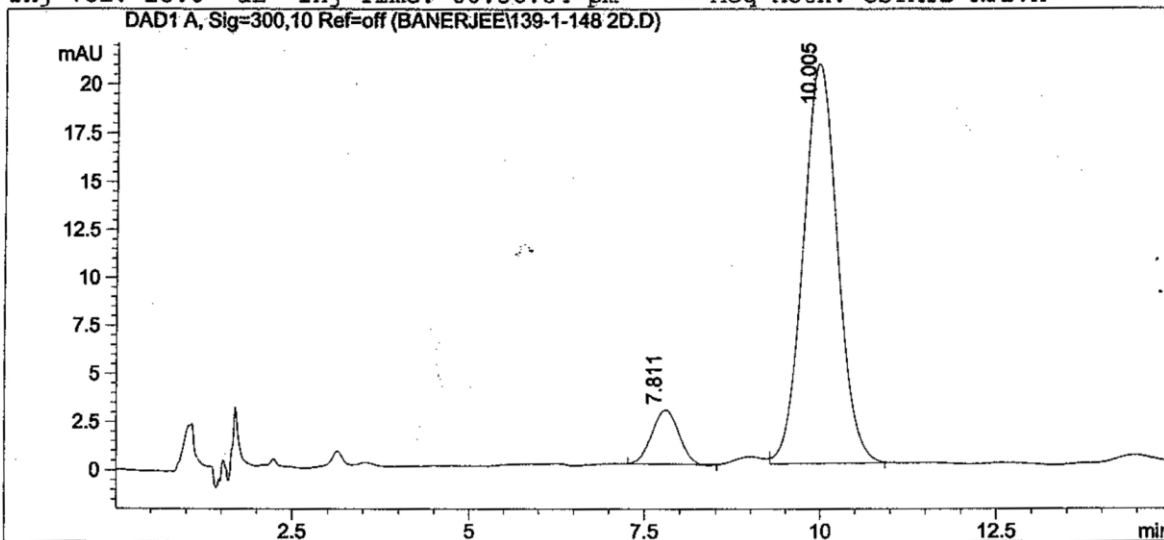

| RT (min) | Area | Area% | Spectra |
|----------|------|-------|---------|
|----------|------|-------|---------|

|      |    |     |  |
|------|----|-----|--|
| 7.81 | 73 | 9.2 |  |
|------|----|-----|--|

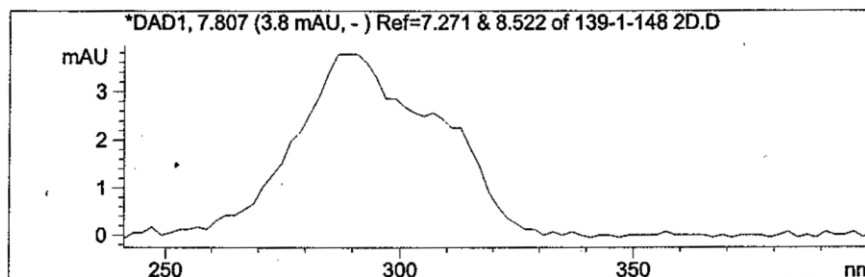

|       |     |      |  |
|-------|-----|------|--|
| 10.01 | 715 | 90.8 |  |
|-------|-----|------|--|

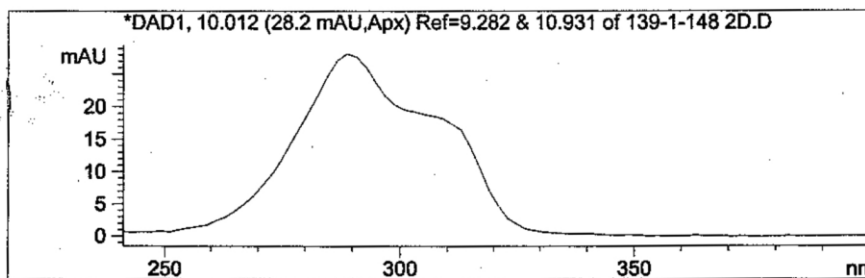

## VI. X-Ray crystal structure data for compound 22:

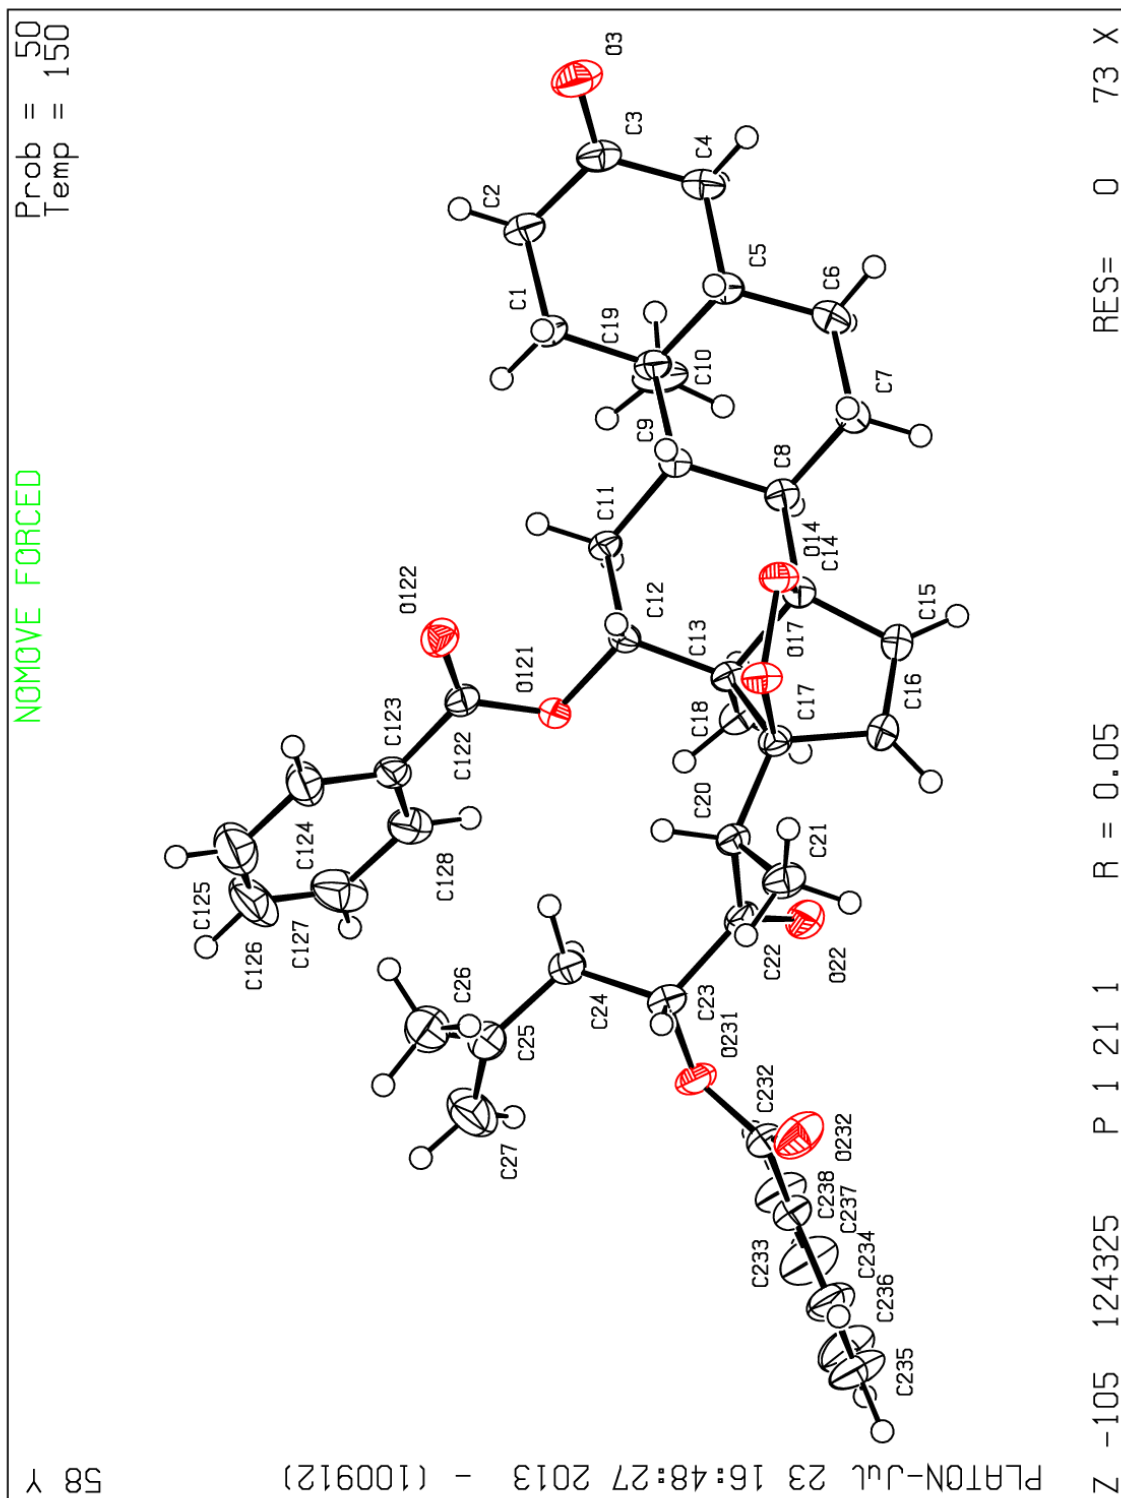

|                        |                |                   |                    |
|------------------------|----------------|-------------------|--------------------|
| Bond precision:        | C-C = 0.0032 Å |                   | Wavelength=0.71073 |
| Cell:                  | a=5.9908 (1)   | b=21.9862 (6)     | c=13.1580 (4)      |
|                        | alpha=90       | beta=94.8749 (10) | gamma=90           |
| Temperature:           | 150 K          |                   |                    |
|                        | Calculated     | Reported          |                    |
| Volume                 | 1726.84 (8)    | 1726.84 (8)       |                    |
| Space group            | P 21           | P 1 21 1          |                    |
| Hall group             | P 2yb          | P 2yb             |                    |
| Moiety formula         | C41 H46 O8     | C41 H46 O8        |                    |
| Sum formula            | C41 H46 O8     | C41 H46 O8        |                    |
| Mr                     | 666.78         | 666.82            |                    |
| Dx, g cm <sup>-3</sup> | 1.282          | 1.282             |                    |
| Z                      | 2              | 2                 |                    |
| Mu (mm <sup>-1</sup> ) | 0.088          | 0.082             |                    |
| F000                   | 712.0          | 712.0             |                    |
| F000'                  | 712.36         |                   |                    |
| h, k, lmax             | 7, 28, 17      | 7, 28, 17         |                    |
| Nref                   | 7923 [ 4065]   | 7290              |                    |
| Tmin, Tmax             | 0.989, 0.993   | 0.968, 0.994      |                    |
| Tmin'                  | 0.969          |                   |                    |

Correction method= MULTI-SCAN

Data completeness= 1.79/0.92      Theta (max)= 27.480

R(reflections)= 0.0490 ( 6058)      wR2(reflections)= 0.0940 ( 7290)

S = 1.061                      Npar= 446

## VI. X-Ray crystal structures for compound 27:

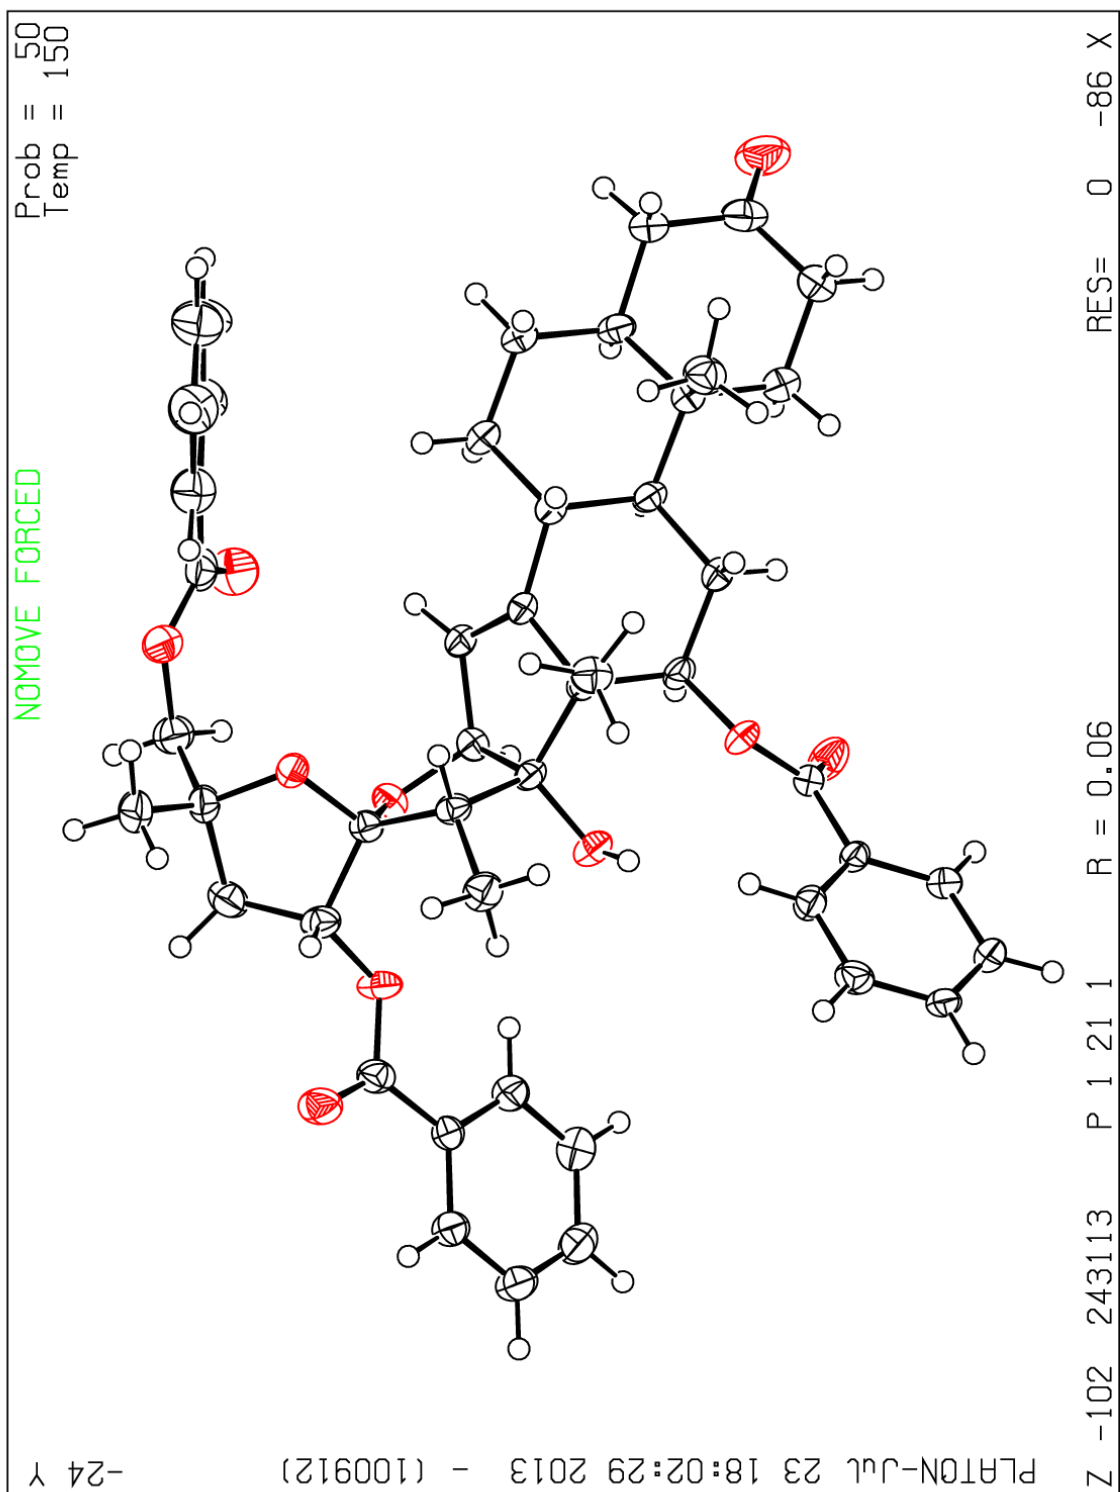

|                        |                |                  |                    |
|------------------------|----------------|------------------|--------------------|
| Bond precision:        | C-C = 0.0044 Å |                  | Wavelength=0.71073 |
| Cell:                  | a=11.2106(3)   | b=6.3133(2)      | c=28.577(1)        |
|                        | alpha=90       | beta=96.8071(12) | gamma=90           |
| Temperature:           | 150 K          |                  |                    |
|                        | Calculated     | Reported         |                    |
| Volume                 | 2008.31(11)    | 2008.30(11)      |                    |
| Space group            | P 21           | P 1 21 1         |                    |
| Hall group             | P 2yb          | P 2yb            |                    |
| Moiety formula         | C48 H52 O10    | C48 H52 O10      |                    |
| Sum formula            | C48 H52 O10    | C48 H52 O10      |                    |
| Mr                     | 788.90         | 788.94           |                    |
| Dx, g cm <sup>-3</sup> | 1.305          | 1.305            |                    |
| Z                      | 2              | 2                |                    |
| Mu (mm <sup>-1</sup> ) | 0.091          | 0.085            |                    |
| F000                   | 840.0          | 840.0            |                    |
| F000'                  | 840.43         |                  |                    |
| h, k, lmax             | 13, 7, 35      | 13, 7, 35        |                    |
| Nref                   | 7881[ 4321]    | 7001             |                    |
| Tmin, Tmax             | 0.982, 0.989   | 0.966, 0.989     |                    |
| Tmin'                  | 0.971          |                  |                    |

Correction method= MULTI-SCAN

Data completeness= 1.62/0.89      Theta(max)= 26.000

R(reflections)= 0.0570( 5560)      wR2(reflections)= 0.1030( 7001)

S = 1.104      Npar= 528
