# Supplementary material
Source: PubMed Central journal article supplement (PMC7511990)

Prob = 50  
Temp = 150

NGMOVE FORCED

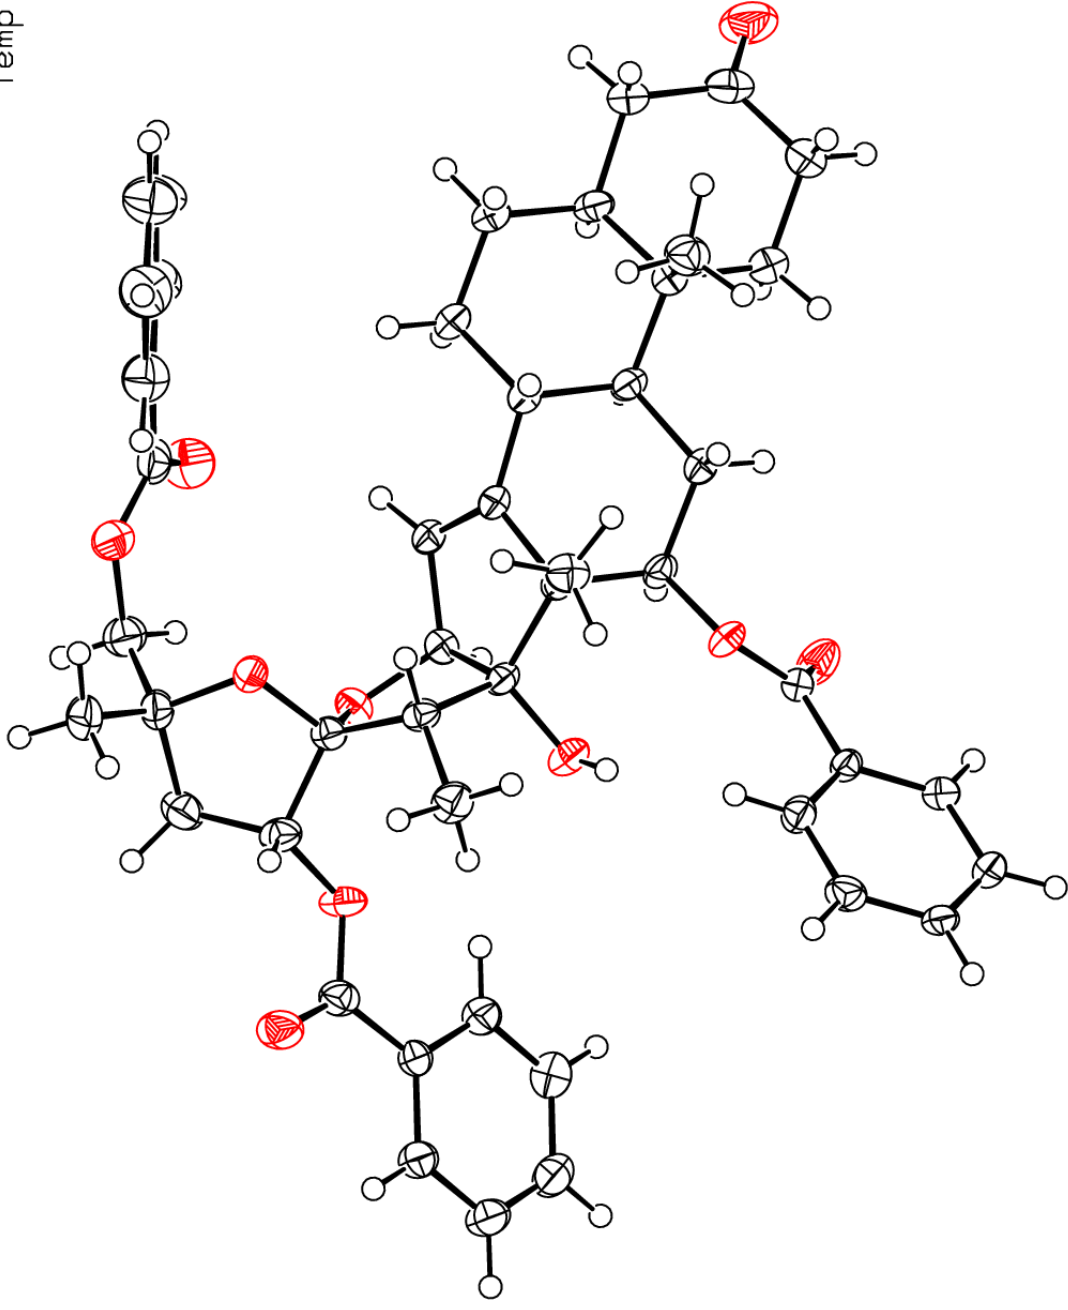

-24 Y

PLATON-JUL 23 18:02:29 2013 - (100912)

Z -102 243113 P 1 21 1 R = 0.06 RES= 0 -86 X

Supplement: NIHMS1626034-supplement-Supporting_info_2.pdf [file NIHMS1626034-supplement-Supporting_info_2.pdf]
